# Supplementary material for: Time-Course Comparative Metabolite Profiling under Osmotic Stress in Tolerant and Sensitive Tibetan Hulless Barley
Source: Hindawi journal article supplement (doi:10.1155/2018/9415409), 2018-12-23
Supplement: f1 [file 9415409.f1.zip]

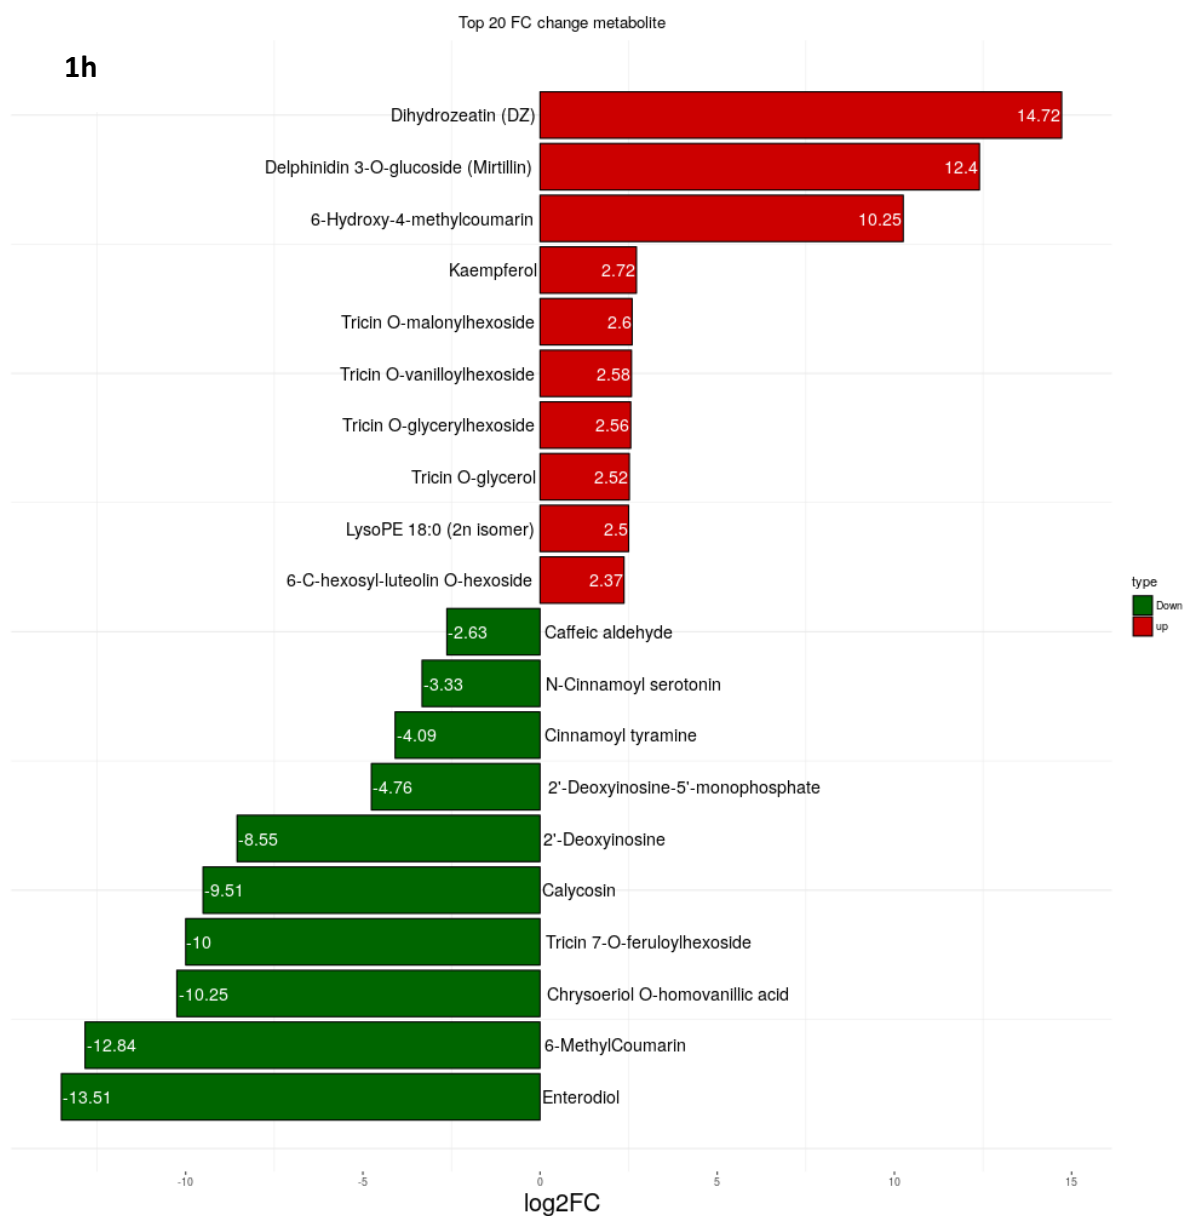

**Supplementary Figure S1:** The top 20 differentially changed metabolites during the different time points in D

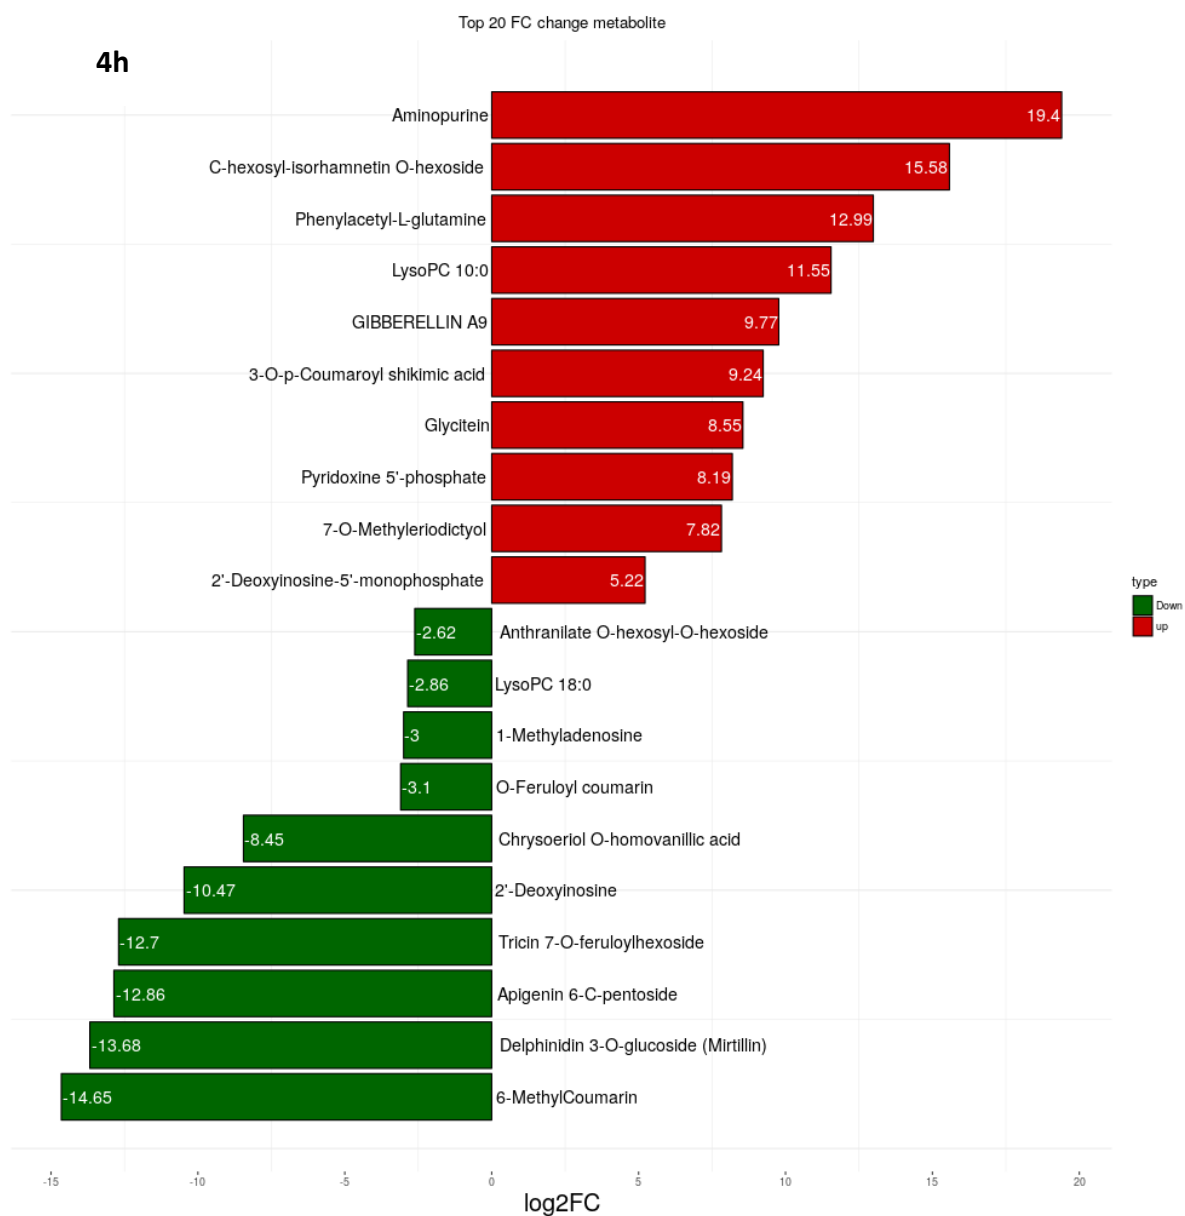

**Supplementary Figure S1:** The top 20 differentially changed metabolites during the different time points in D

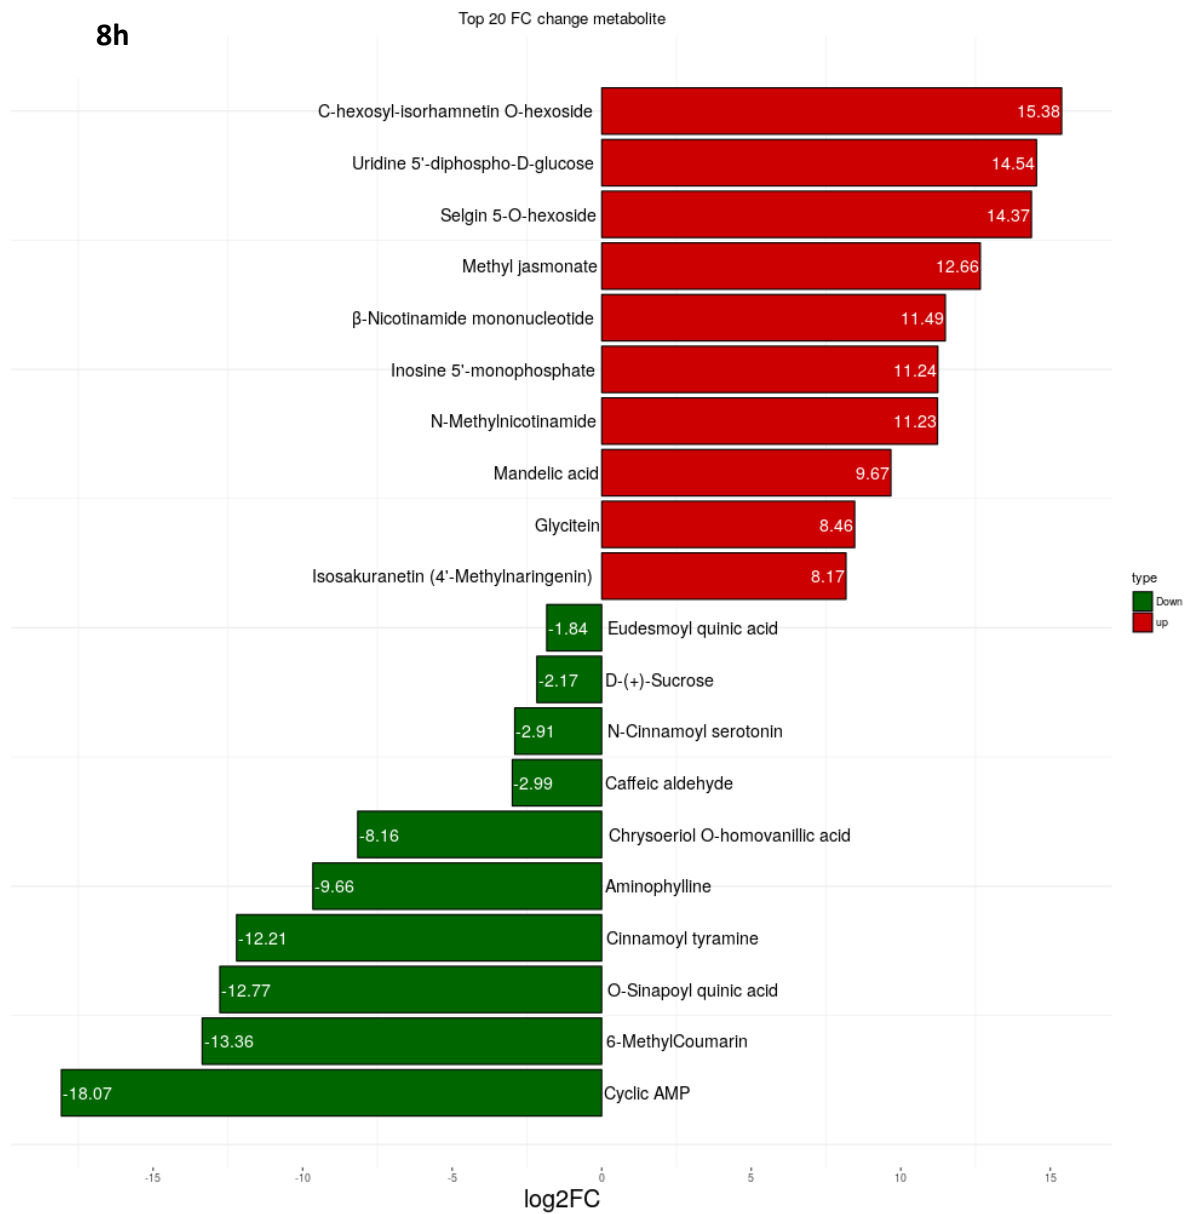

**Supplementary Figure S1:** The top 20 differentially changed metabolites during the different time points in D

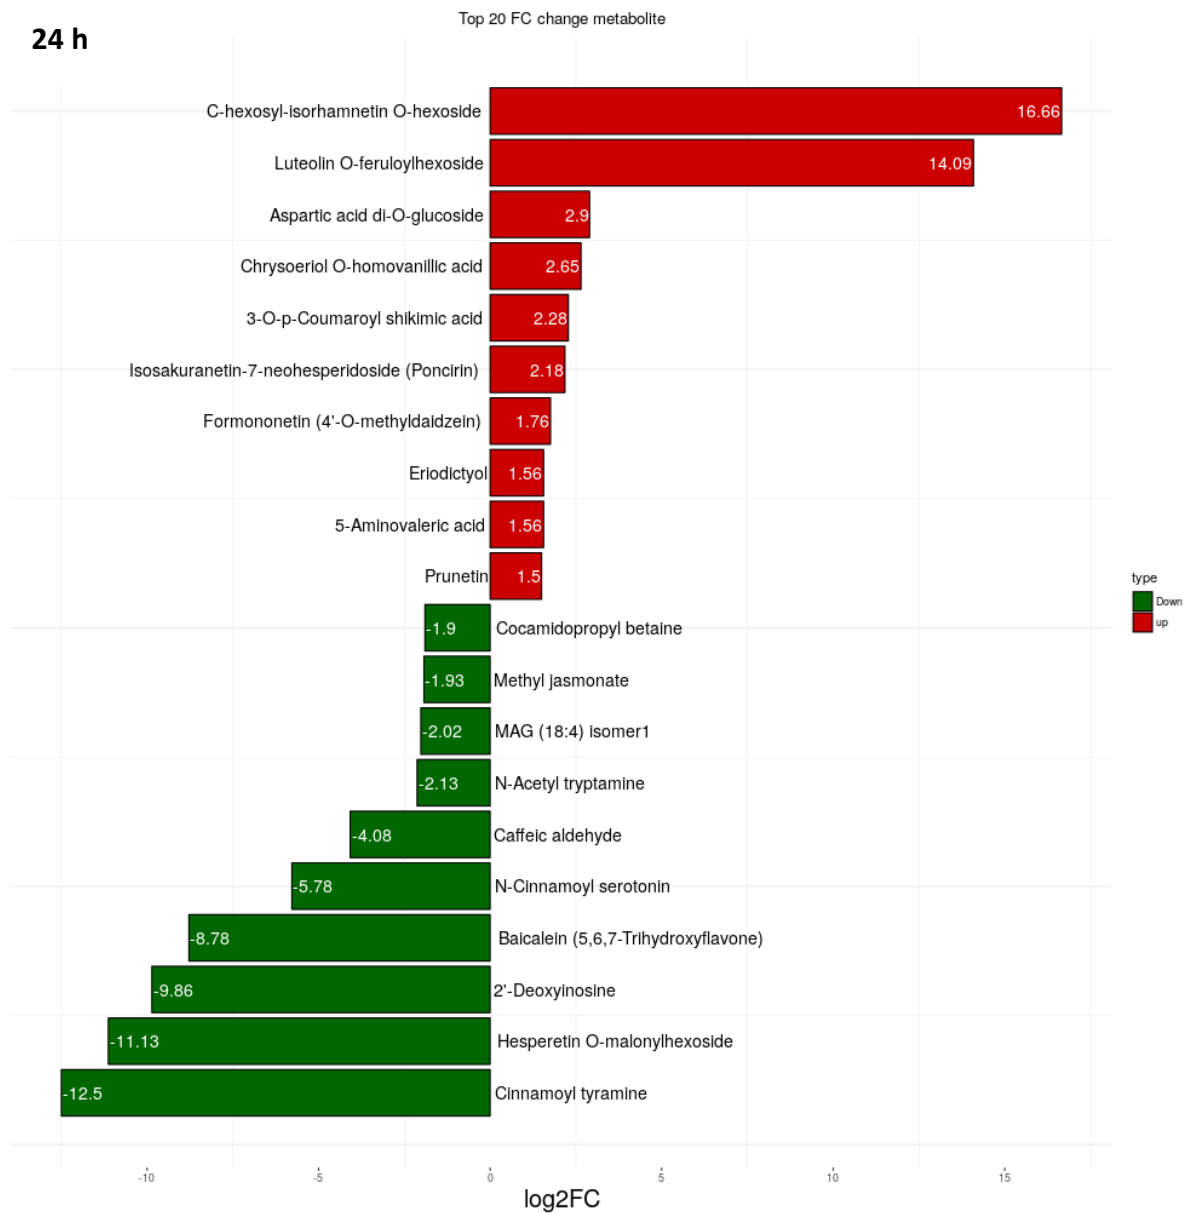

**Supplementary Figure S1:** The top 20 differentially changed metabolites during the different time points in D

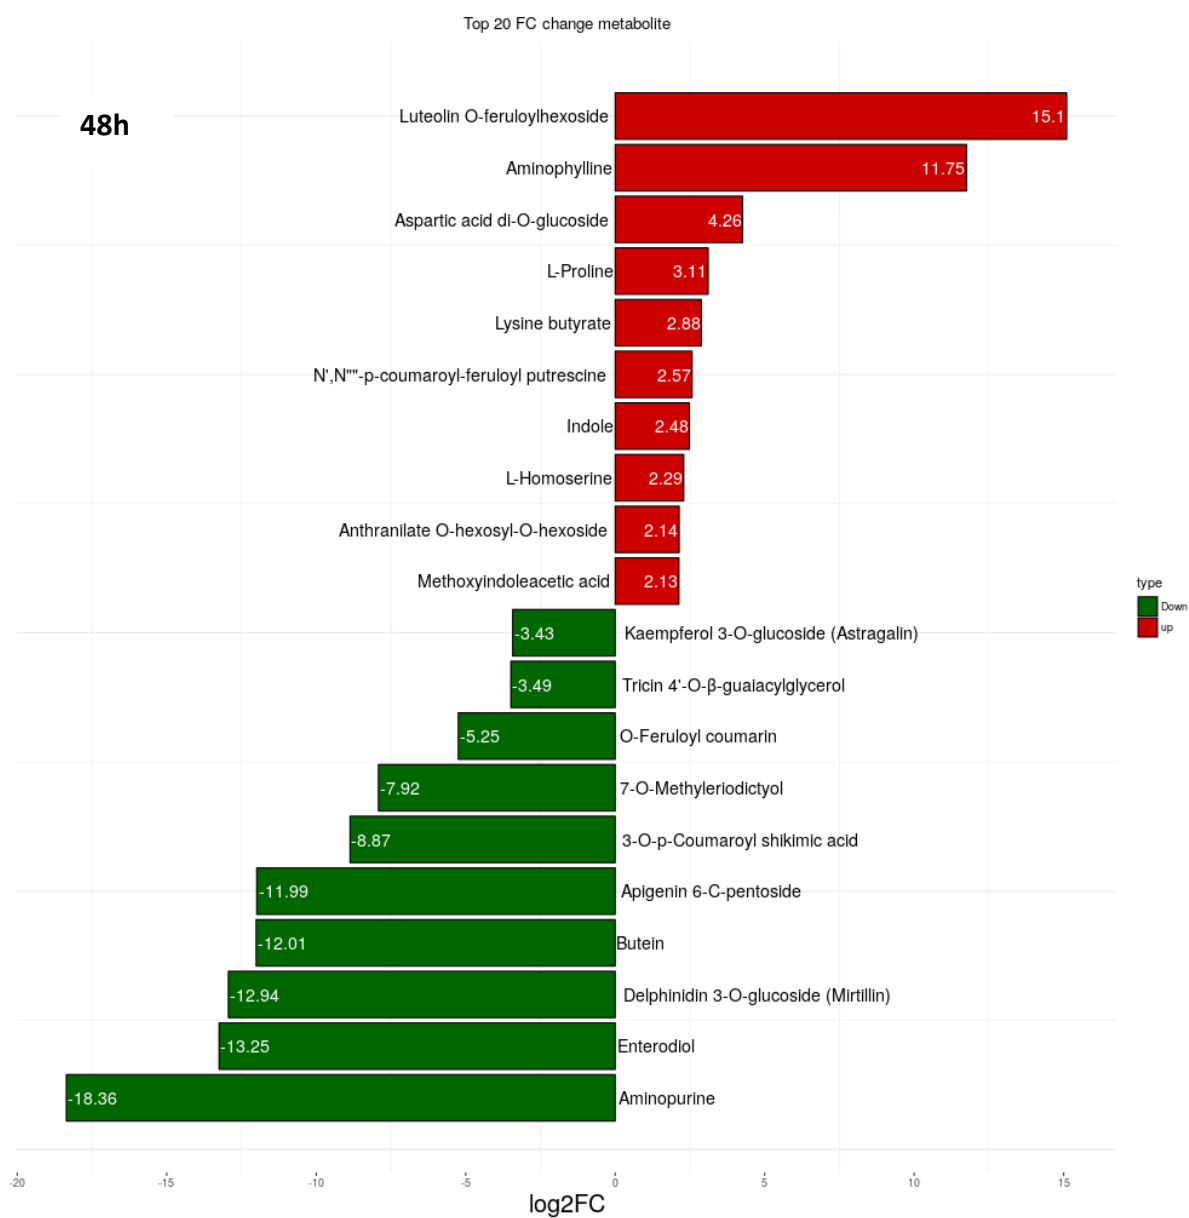

**Supplementary Figure S1:** The top 20 differentially changed metabolites during the different time points in D

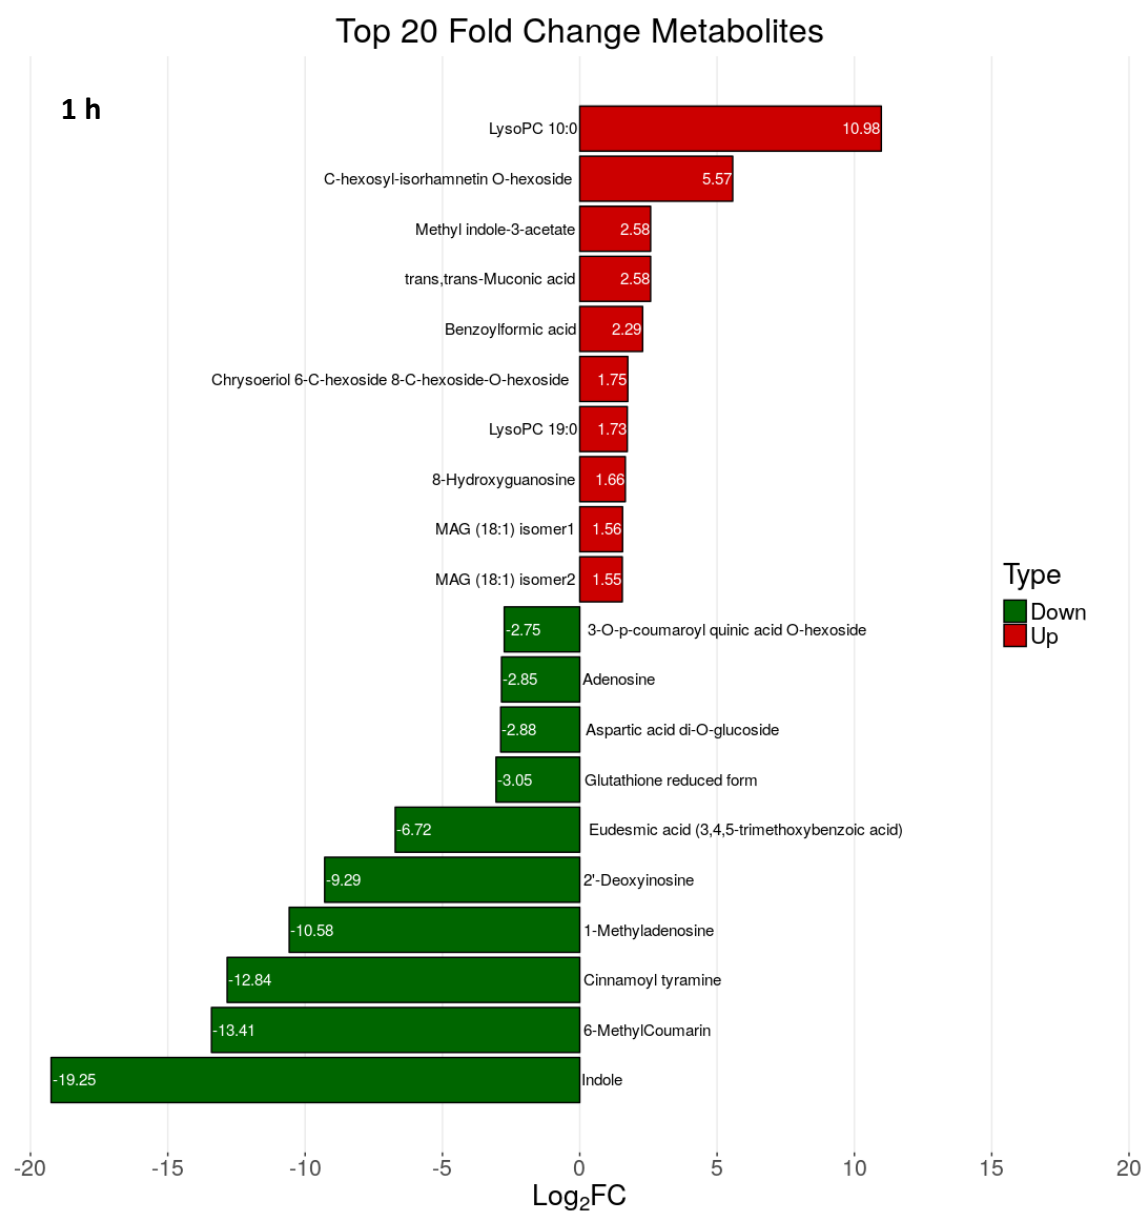

**Supplementary Figure S2:** The top 20 differentially changed metabolites during the different time points in XL

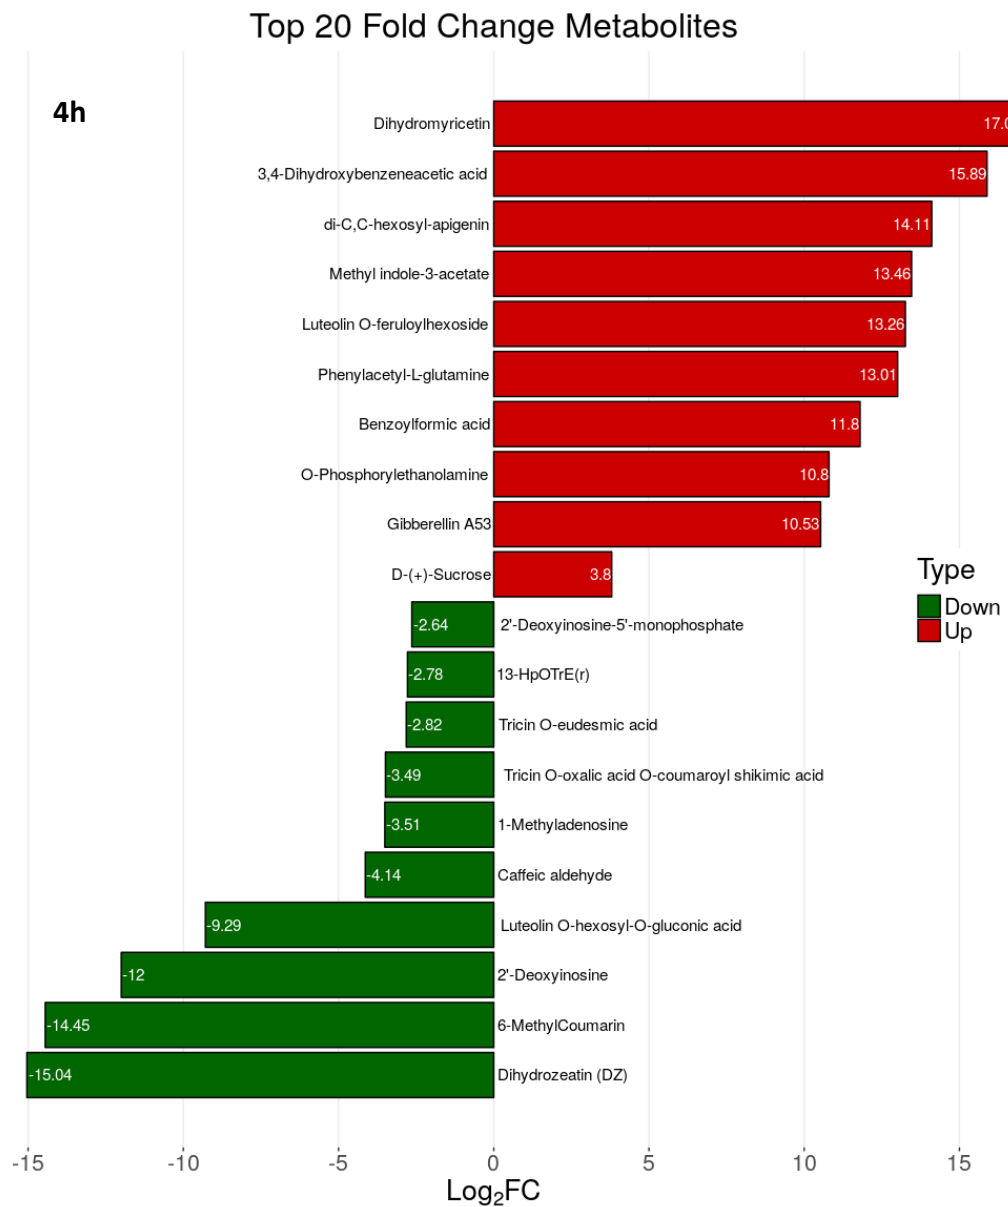

**Supplementary Figure S2:** The top 20 differentially changed metabolites during the different time points in XL

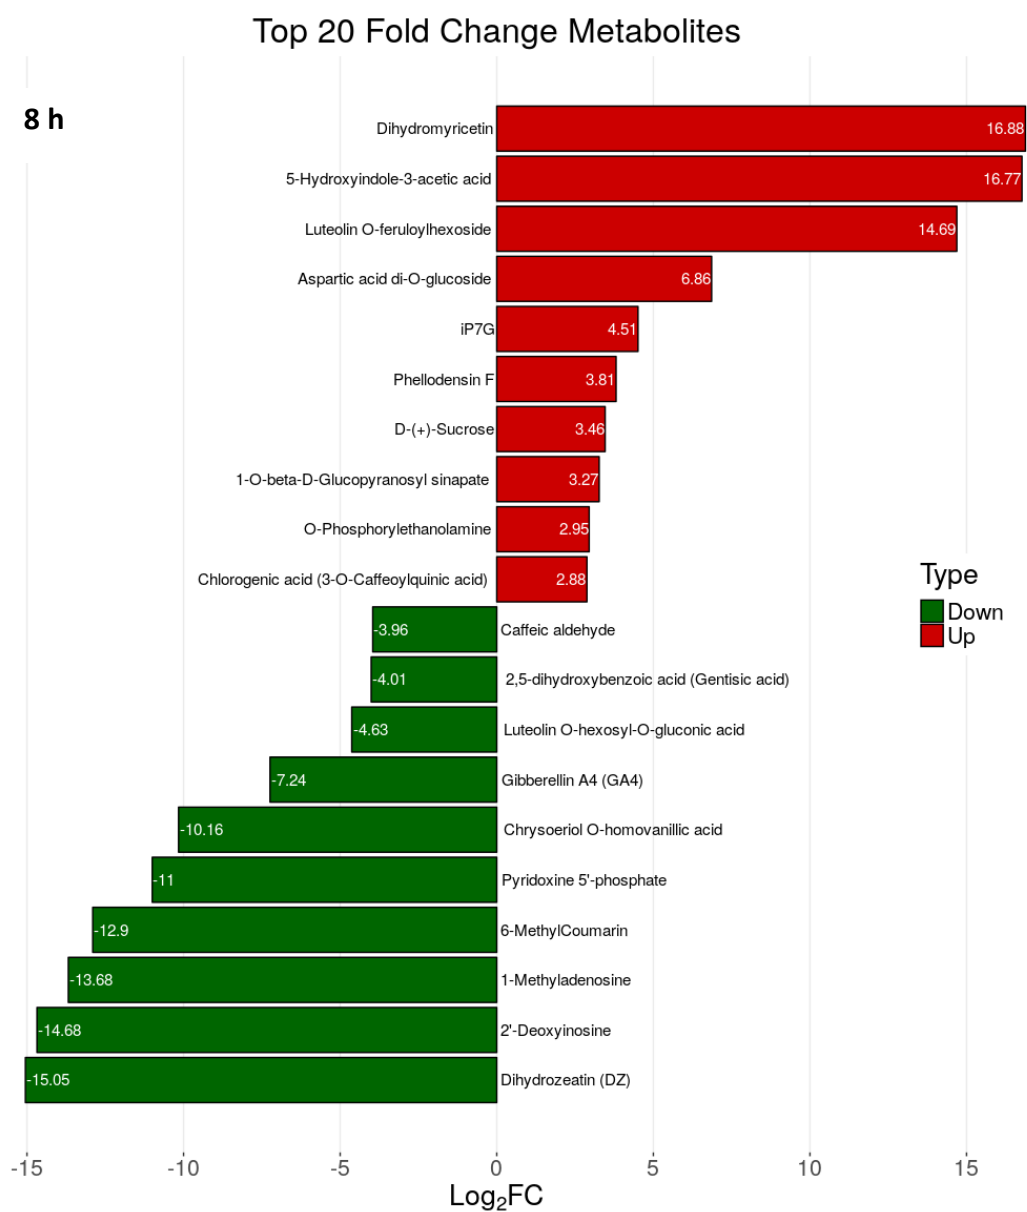

**Supplementary Figure S2:** The top 20 differentially changed metabolites during the different time points in XL



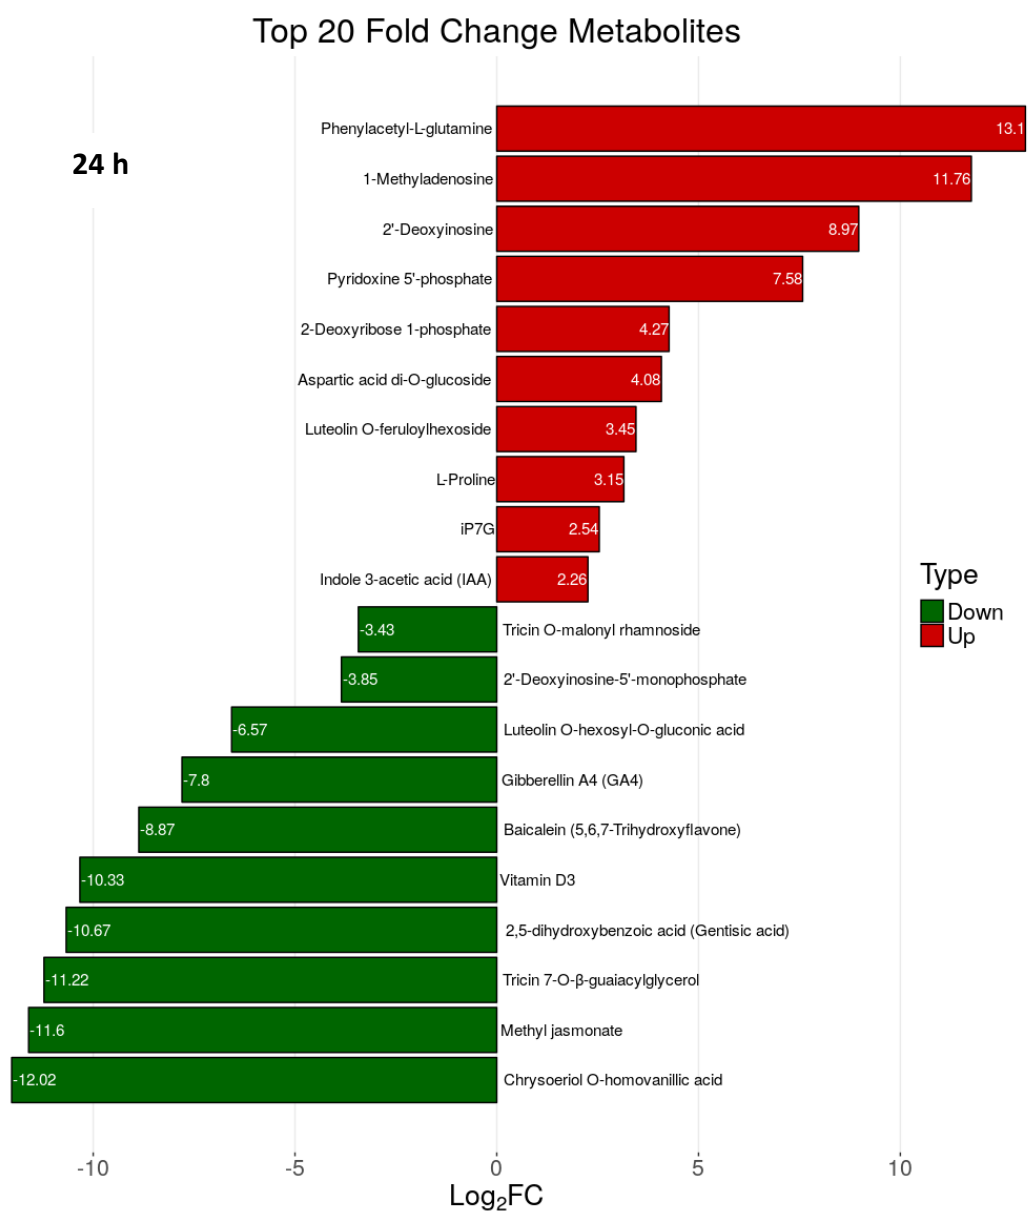

**Supplementary Figure S2:** The top 20 differentially changed metabolites during the different time points in XL

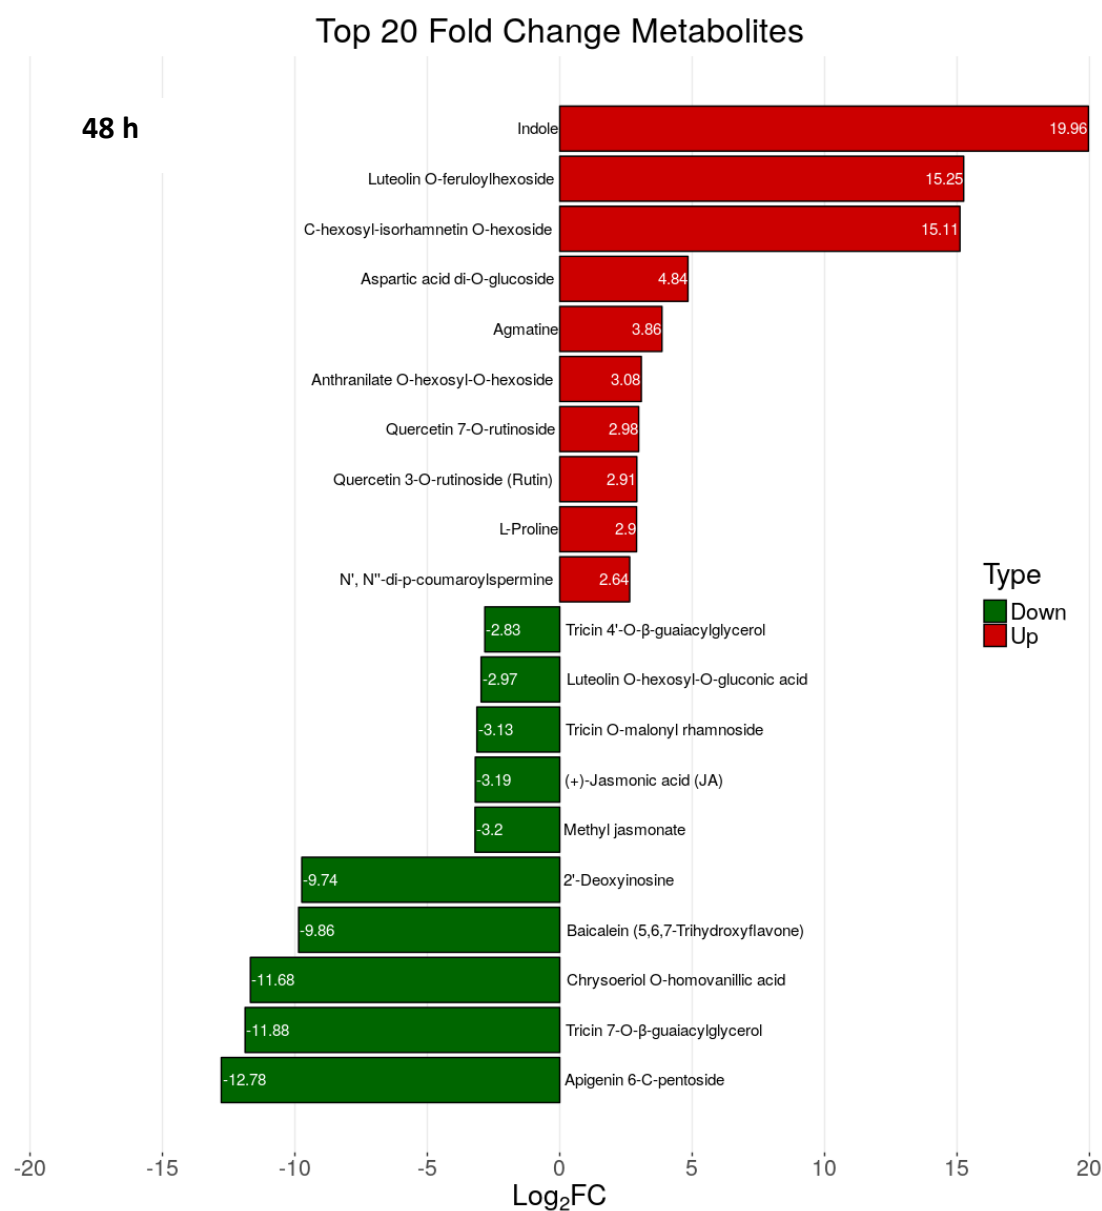

**Supplementary Figure S2:** The top 20 differentially changed metabolites during the different time points in XL

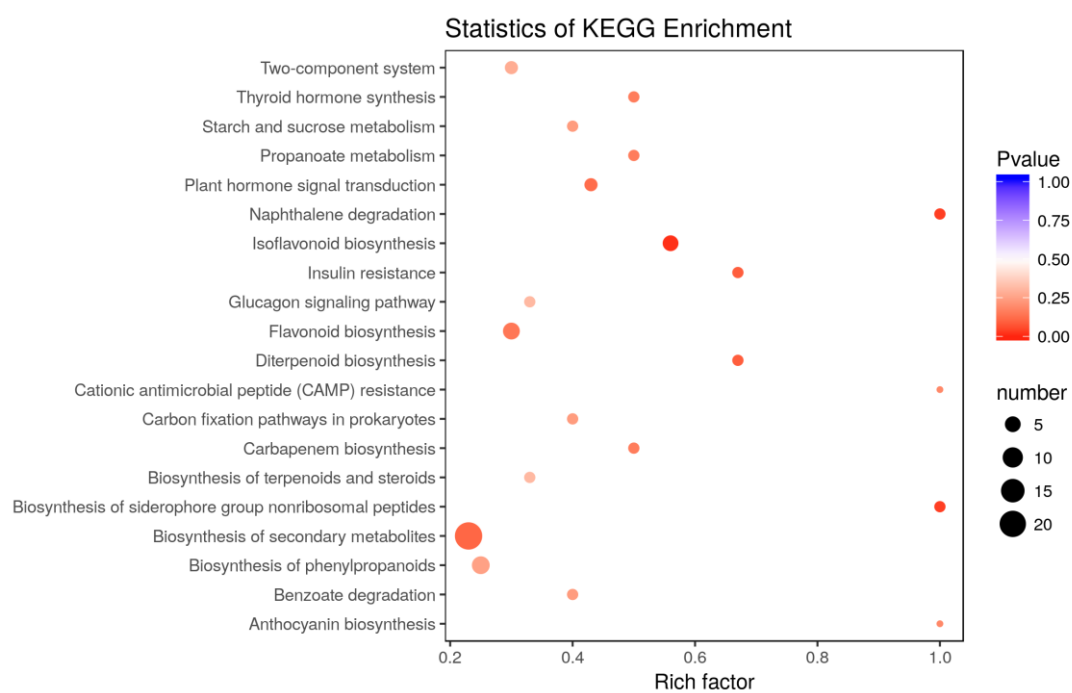

**Supplementary Figure S3: KEGG enrichment of differentially changed metabolites at 1 h between XL and D**

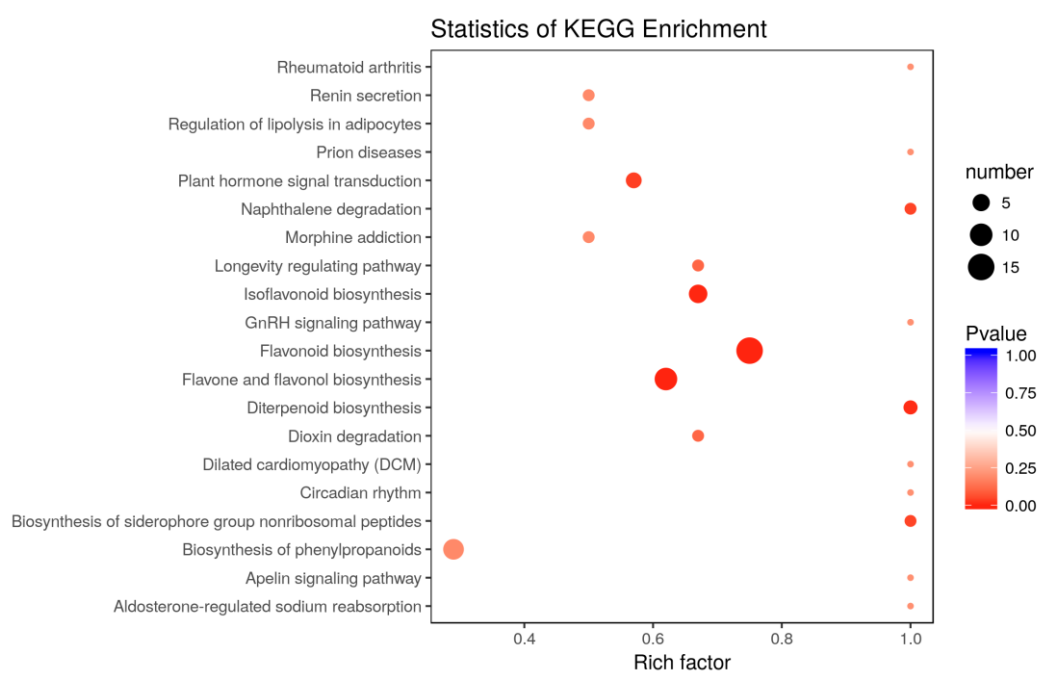

**Supplementary Figure S4:** KEGG enrichment of differentially changed metabolites at 4 h between XL and D

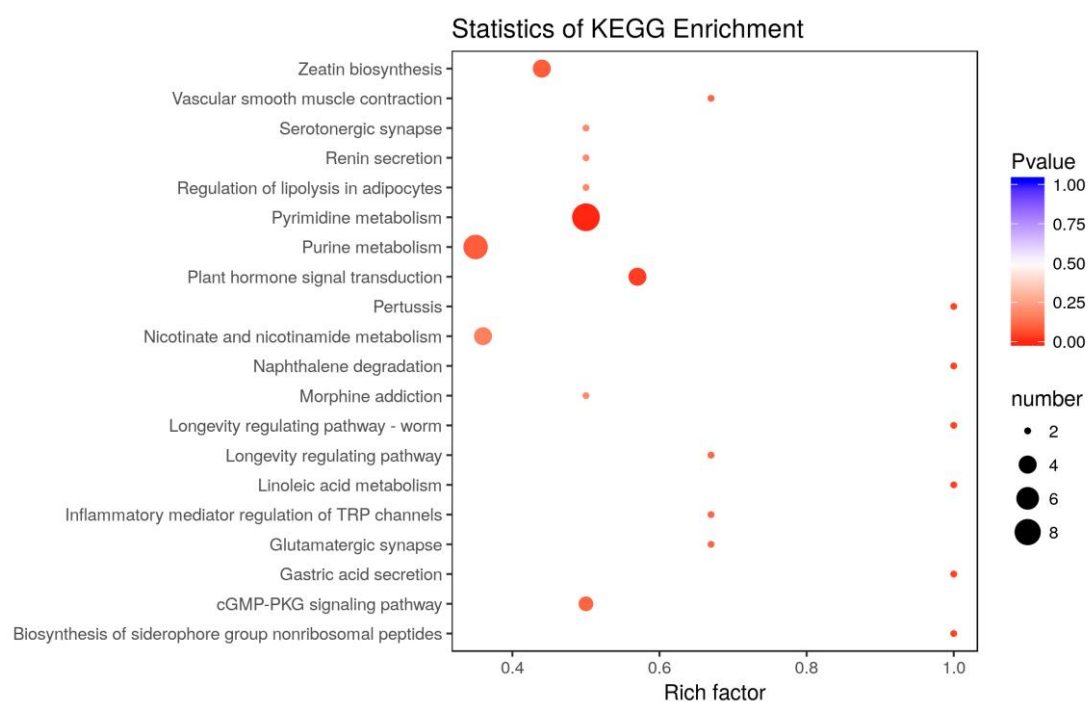

**Supplementary Figure S5:** KEGG enrichment of differentially changed metabolites at 8 h between XL and D

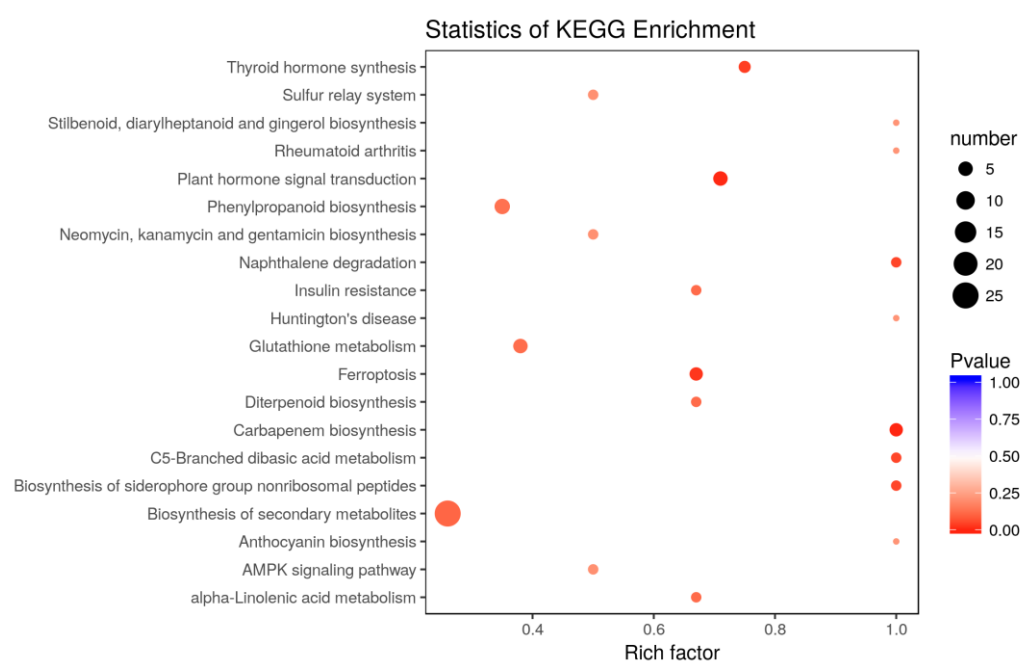

**Supplementary Figure S6:** KEGG enrichment of differentially changed metabolites at 24 h between XL and D

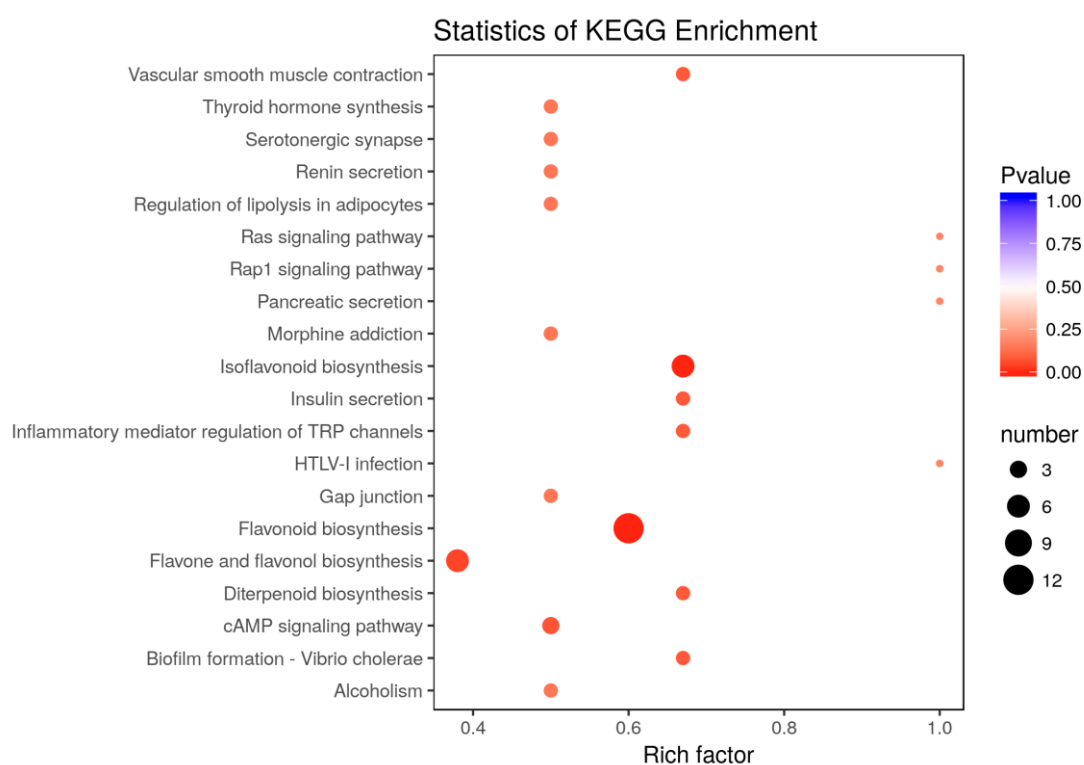

**Supplementary Figure S7:** KEGG enrichment of differentially changed metabolites at 48 h between XL and D
