# Supplementary material for: Time-Course Comparative Metabolite Profiling under Osmotic Stress in Tolerant and Sensitive Tibetan Hulless Barley
Source: Biomed Res Int. 2018 Dec 23;2018:9415409. doi: 10.1155/2018/9415409 (PMC6323448; doi:10.1155/2018/9415409)
Supplement: Supplementary Materials — Supplementary Table S1: list of metabolites composing the core metabolome responsive to osmotic stress in hulless barley. Supplementary Table S2: list of the differentially changed metabolites between XL and D at 1 h. Supplementary Table S3: list of the differentially changed metabolites between XL and D at 4 h. Supplementary Table S4: list of the differentially changed metabolites between XL and D at 8 h. Supplementary Table S5: list of the differentially changed metabolites between XL and D at 24 h. Supplementary Table S6: list of the differentially changed metabolites between XL and D at 48 h. Supplementary Table S7: shared and specific differentially changed metabolites between XL and D at the different time points. Supplementary Figure S1: the top 20 differentially changed metabolites during the different time points in D. Supplementary Figure S2: the top 20 differentially changed metabolites during the different time points in XL. Supplementary Figure S3: KEGG enrichment of differentially changed metabolites at 1 h between XL and D. Supplementary Figure S4: KEGG enrichment of differentially changed metabolites at 4 h between XL and D. Supplementary Figure S5: KEGG enrichment of differentially changed metabolites at 8 h between XL and D. Supplementary Figure S6: KEGG enrichment of differentially changed metabolites at 24 h between XL and D. Supplementary Figure S7: KEGG enrichment of differentially changed metabolites at 48 h between XL and D. [file 9415409.f1.zip › 9415409.f1.xlsx]

## Sheet: Feuil1
Index	Compound	Class
Hov474	Selgin 5-O-hexoside	Flavone
Hov688	O-methylChrysoeriol 5-O-hexoside	Flavone
Hov194	N', N''-di-p-coumaroylspermine	Phenolamides
Hov161	Kaempferide	Flavonol
Hov477	sn-Glycero-3-phosphocholine	Cholines
Hov412	Tricin O-vanilloylhexoside	Flavone
Hov129	Ayanin	Flavonol
Hov686	O-methylChrysoeriol 7-O-hexoside	Flavone
Hov165	Caffeic aldehyde	Hydroxycinnamoyl derivatives
Hov51	Tricin	Flavone
Hov258	MAG (18:4) isomer2	Lipids_Glycerolipids
Hov169	Aminopurine	Others
Hov117	Luteolin O-feruloylhexoside	Flavone C-glycosides
Hov480	Hydroxy-methoxycinnamate	Hydroxycinnamoyl derivatives
Hov481	2-Aminoadipic acid (L-Homoglutamic acid)	Amino acids
Hov482	Aspartic acid di-O-glucoside	Amino acid derivatives
Hov391	Spermidine	Phenolamides
Hov705	N-Sinapoyl agmatine	Phenolamides
Hov664	N',N"-p-coumaroyl-feruloyl putrescine	Phenolamides
Hov260	Agmatine	Phenolamides
Hov171	Nicotinic acid adenine dinucleotide	Nucleotide and its derivates
Hov58	Chrysoeriol 7-O-hexoside	Flavone
Hov269	Chrysoeriol 6-C-hexoside 8-C-hexoside-O-hexoside	Flavone C-glycosides
Hov486	C-hexosyl-isorhamnetin O-hexoside	Flavone C-glycosides
Hov71	C-hexosyl-luteolin O-hexoside	Flavone C-glycosides
Hov272	Luteolin C-hexoside	Flavone C-glycosides
Hov385	di-C,C-hexosyl-apigenin	Flavone C-glycosides
Hov123	Apigenin 6-C-pentoside	Flavone C-glycosides
Hov146	C-hexosyl-apigenin O-cinnamoylhexoside	Flavone C-glycosides
Hov74	Luteolin C-hexosyl-O-rhamnoside O-hexoside	Flavone C-glycosides
Hov118	Tricin 5-O-hexosyl-O-hexoside	Flavone
Hov281	Tricin 7-O-hexosyl-O-hexoside	Flavone
Hov624	Tricin di-O-hexoside	Flavone
Hov175	Tricin O-malonylhexoside	Flavone
Hov2	Tricin 4'-O-(¦Â-guaiacylglyceryl) ether O-hexoside	Flavonolignan
Hov448	Tricin 7-O-¦Â-guaiacylglycerol	Flavonolignan
Hov677	Tricin O-phenylformic acid	Flavone
Hov721	Tricin 4'-O-syringyl alcohol	Flavonolignan
Hov53	Tricin 4'-O-¦Â-guaiacylglycerol	Flavonolignan
Hov80	Azoxystrobin acid	Others
Hov749	D-erythro-Dihydrosphingosine	Others
Hov139	N-Cinnamoyl serotonin	Tryptamine derivatives
Hov288	Methoxyindoleacetic acid	Indole derivatives
Hov723	LysoPC 18:3	Lipids_Glycerophospholipids
Hov724	LysoPC 16:0	Lipids_Glycerophospholipids
Hov767	LysoPC 18:3 (2n isomer)	Lipids_Glycerophospholipids
Hov25	LysoPE 18:0 (2n isomer)	Lipids_Glycerophospholipids
Hov488	LysoPE 18:0	Lipids_Glycerophospholipids
Hov687	Lysine butyrate	Amino acid derivatives
Hov292	Indole	Indole derivatives
Hov207	Tricin 4'-O-(¦Â-guaiacylglyceryl) ether 5-O-hexosyl-O-hexoside	Flavonolignan
Hov293	N-Lauryldiethanolamine	Others
Hov438	Tricin 4'-O-syringic acid	Flavonolignan
Hov182	4-Hydroxysphinganine	Lipids_Fatty acids
Hov296	Phytocassane C	Terpenoids
Hov26	LysoPC 19:0	Lipids_Glycerophospholipids
Hov598	PC 19:2/16:0	Lipids_Glycerophospholipids
Hov298	LysoPC 17:0	Lipids_Glycerophospholipids
Hov826	2-Deoxyribose 1-phosphate	Carbohydrates
Hov830	7-hydroxycoumarin-beta-rhamnoside	Coumarins
Hov836	Anthranilate O-hexosyl-O-hexoside	Benzoic acid derivatives
Hov1139	13-HpOTrE(r)	Lipids_Fatty acids
Hov853	L-Glutamic acid O-glucoside	Amino acid derivatives
Hov1340	Tricin O-malonyl rhamnoside	Flavone
Hov1159	Tricin 4'-O-(syringyl alcohol) ether 5-O-hexoside	Flavonolignan
Hov1277	Tricin O-eudesmic acid	Flavone
Hov892	5-O-p-coumaroyl quinic acid O-hexoside	Quinate and its derivatives
Hov894	3-O-p-coumaroyl quinic acid O-hexoside	Quinate and its derivatives
Hov897	3-O-p-Coumaroyl shikimic acid	Quinate and its derivatives
Hov1233	N-Acetylglucosamine 1-phosphate	Others
Hov782	LysoPE 16:0	Lipids_Glycerophospholipids
Hov908	Glutathione oxidized	Amino acid derivatives
Hov1278	L-Cysteinyl-L-leucylglycyl-L-alanylglycylglycyl-L-alanylglycyl-L-cysteine	Amino acid derivatives
Hov912	Adenosine	Nucleotide and its derivates
Hov205	(+)-Jasmonic acid (JA)	Phytohormones
Hov152	LysoPC 16:0 (2n isomer)	Lipids_Glycerophospholipids
Hov184	LysoPC 18:0	Lipids_Glycerophospholipids
Hov185	LysoPC 20:1 (2n isomer)	Lipids_Glycerophospholipids
Hov186	LysoPC 20:1	Lipids_Glycerophospholipids
Hov784	LysoPE 16:0 (2n isomer)	Lipids_Glycerophospholipids
Hov732	L-Proline	Amino acids
Hov919	L-Threonine	Amino acids
Hov772	L-(+)-Lysine	Amino acids
Hov1260	L-Histidine	Amino acids
Hov715	L-Valine	Amino acids
Hov1169	Cucurbitacin E	Terpenoids
Hov499	5-Aminovaleric acid	Amino acid derivatives
Hov638	¦Â-Nicotinamide mononucleotide	Nucleotide and its derivates
Hov468	Kaempferol	Flavonol
Hov506	Methyl jasmonate	Phytohormones
Hov1348	Sebacate	Organic acids
Hov521	Chrysoeriol	Flavone
Hov219	Kaempferol 3-O-rutinoside (Nicotiflorin)	Flavonol
Hov790	Chlorogenic acid (3-O-Caffeoylquinic acid)	Quinate and its derivatives
Hov976	Glutathione reduced form	Amino acid derivatives
Hov97	6-hydroxynicotinic acid	Vitamins
Hov1240	L-Pipecolic acid	Amino acid derivatives
Hov996	Formononetin (4'-O-methyldaidzein)	Isoflavone
Hov539	Kumatakenin	Flavonol
Hov999	Baicalein (5,6,7-Trihydroxyflavone)	Flavone
Hov1007	Eriodictyol	Flavanone
Hov1009	7-O-Methyleriodictyol	Flavanone
Hov816	Kaempferol 3-O-glucoside (Astragalin)	Flavonol
Hov1013	Coniferyl alcohol	Hydroxycinnamoyl derivatives
Hov331	Acetylcholine	Cholines
Hov1020	D-Erythronolactone	Organic acids
Hov817	Chlorogenic acid methyl ester	Quinate and its derivatives
Hov1024	D(+)-Glucose	Carbohydrates
Hov337	N6-Isopentenyladenine (iP)	Phytohormones
Hov1037	Fumaric acid	Organic acids
Hov1041	D-Arabitol	Alcohols and polyols
Hov656	Hesperetin	Flavanone
Hov737	Dl-Norvaline	Amino acids
Hov1221	Vitamin D3	Vitamins
Hov349	S-(5'-Adenosyl)-L-methionine	Amino acid derivatives
Hov809	Flavin adenine dinucleotide (FAD)	Nucleotide and its derivates
Hov570	Dihydromyricetin	Flavonol
Hov1070	Uridine 5¡¯-diphosphate	Nucleotide and its derivates
Hov1270	Gibberellin A53	Phytohormones
Hov682	L-Palmitoylcarnitine	Others
Hov1077	D-Glucose 6-phosphate	Carbohydrates
Hov360	1-methylguanidine	Nucleotide and its derivates
Hov1167	D-Fructose 6-phosphate	Carbohydrates
Hov1143	Aminophylline	Alkaloids
Hov367	Sissotrin	Isoflavone
Hov1100	Syringetin	Flavonol
Hov592	Butein	Flavanone
Hov214	Cytidine	Nucleotide and its derivates
Hov445	Cinnamoyl tyramine	Tryptamine derivatives
Hov755	Tricin 4'-O-(¦Â-guaiacylglyceryl) ether-O-rutinoside	Flavonolignan
Hov168	DGMG (18:2) isomer3	Lipids_Glycerolipids
Hov745	MAG (18:1) isomer2	Lipids_Glycerolipids
Hov489	N'-Feruloyl putrescine	Phenolamides
Hov451	N-Feruloyl putrescine	Phenolamides
Hov179	Phellodensin F	Others
Hov87	Cocamidopropyl betaine	Others
Hov752	MAG (18:1) isomer1	Lipids_Glycerolipids
Hov845	4-Methoxycinnamic acid	Hydroxycinnamoyl derivatives
Hov1297	2'-Deoxyinosine	Nucleotide and its derivates
Hov1141	Hesperetin O-malonylhexoside	Flavanone
Hov868	Acacetin O-acetyl hexoside	Flavone
Hov881	Chrysoeriol O-homovanillic acid	Flavone
Hov1267	Tricin O-oxalic acid O-coumaroyl shikimic acid	Flavone
Hov1132	1-O-p-Coumaroyl quinic acid	Quinate and its derivatives
Hov895	3-O-p-coumaroyl shikimic acid O-hexoside	Quinate and its derivatives
Hov801	3-O-p-Coumaroyl quinic acid	Quinate and its derivatives
Hov914	LysoPE 14:0 (2n isomer)	Lipids_Glycerophospholipids
Hov493	Thymine	Nucleotide and its derivates
Hov306	Cinnamic acid	Hydroxycinnamoyl derivatives
Hov314	Phloretin	Flavanone
Hov970	D-(+)-Sucrose	Carbohydrates
Hov1328	Gibberellin A4 (GA4)	Phytohormones
Hov810	Isosakuranetin-7-neohesperidoside (Poncirin)	Flavanone
Hov354	3,4-Dihydrocoumarin	Coumarins
Hov650	N-Acetylcysteine	Amino acid derivatives
Hov580	Cyclic AMP	Nucleotide and its derivates
Hov1091	Prunetin	Isoflavone
Hov195	O-Sinapoyl quinic acid	Quinate and its derivatives
Hov158	Naringenin C-hexoside	Flavone C-glycosides
Hov689	Apigenin C-glucoside	Flavone C-glycosides
Hov484	Inosine 5'-monophosphate	Nucleotide and its derivates
Hov42	Isoquinoline	Alkaloids
Hov694	Niacinamide	Vitamins
Hov291	iP7G	Nucleotide and its derivates
Hov728	Oryzalexin E	Terpenoids
Hov834	Myristoleic acid (C14:1)	Lipids_Fatty acids
Hov848	Citramalate	Organic acids
Hov857	Uridine 5'-diphospho-D-glucose	Nucleotide and its derivates
Hov1147	Cyanidin O-syringic acid	Anthocyanins
Hov893	Eudesmoyl quinic acid	Quinate and its derivatives
Hov1280	Pyrrole-2-carboxylic acid	Amino acid derivatives
Hov1300	1-Methylhistidine	Amino acid derivatives
Hov1160	2¨Cfuranoic acid	Organic acids
Hov947	Benzoylformic acid	Organic acids
Hov516	Dl-2-Aminooctanoic acid	Organic acids
Hov517	4-Acetamidobutyric acid	Organic acids
Hov520	Apigenin 5-O-glucoside	Flavone
Hov96	Menaquinone (K2)	Vitamins
Hov316	Pantothenol	Alcohols and polyols
Hov696	Isovitexin	Flavone C-glycosides
Hov330	Indole 3-acetic acid (IAA)	Phytohormones
Hov1031	(+)-cis,trans-Abscisic acid (ABA)	Phytohormones
Hov1140	Citraconic acid	Organic acids
Hov1172	Mandelic acid	Organic acids
Hov472	Luteolin 7-O-glucoside (Cynaroside)	Flavone
Hov1052	3-Hydroxyanthranilic acid	Organic acids
Hov562	Indole-3-carboxaldehyde	Indole derivatives
Hov578	GIBBERELLIN A9	Phytohormones
Hov1084	Calycosin	Isoflavone
Hov1086	Glycitein	Isoflavone
Hov221	Kaempferol 3-O-galactoside (Trifolin)	Flavonol
Hov587	6-MethylCoumarin	Coumarins
Hov1110	Isosakuranetin (4'-Methylnaringenin)	Flavanone
Hov594	Anthranilic acid	Benzoic acid derivatives
Hov65	delta-Tridecalactone	Lipids_Fatty acids
Hov66	LysoPC 16:1	Lipids_Glycerophospholipids
Hov271	Eriodictiol C-hexosyl-O-hexoside	Flavone C-glycosides
Hov75	C-hexosyl-apigenin C-pentoside	Flavone C-glycosides
Hov76	8-C-hexosyl chrysoeriol O-hexoside	Flavone C-glycosides
Hov765	LysoPC 18:2	Lipids_Glycerophospholipids
Hov768	LysoPE 18:2 (2n isomer)	Lipids_Glycerophospholipids
Hov82	LysoPE 18:1	Lipids_Glycerophospholipids
Hov83	LysoPC 18:1	Lipids_Glycerophospholipids
Hov769	MAG (18:2)	Lipids_Glycerolipids
Hov757	LysoPC 10:0	Lipids_Glycerophospholipids
Hov88	LysoPC 15:0	Lipids_Glycerophospholipids
Hov89	LysoPC 18:0 (2n isomer)	Lipids_Glycerophospholipids
Hov730	LysoPC 20:4	Lipids_Glycerophospholipids
Hov661	Phenylacetyl-L-glutamine	Amino acid derivatives
Hov54	Quercetin 3-O-rutinoside (Rutin)	Flavonol
Hov519	Chrysin	Flavone
Hov522	Apigenin	Flavone
Hov1302	Pyridoxine 5'-phosphate	Vitamins
Hov317	1-Methyladenosine	Nucleotide and its derivates
Hov538	L-Methionine methyl ester	Amino acid derivatives
Hov543	Nicotinic Acid Methyl Ester (Methyl Nicotinate)	Vitamins
Hov461	Riboflavin	Vitamins
Hov100	cis-Zeatin (cZ)	Phytohormones
Hov424	Dihydrozeatin (DZ)	Phytohormones
Hov566	N-Acetyl-5-hydroxytryptamine	Tryptamine derivatives
Hov1299	O-Phosphorylethanolamine	Others
Hov595	3,4-Dihydroxy-DL-phenylalanine	Amino acid derivatives
Hov720	Deoxyadenosine	Nucleotide and its derivates
Hov164	Luteolin 6-C-glucoside	Flavone C-glycosides
Hov121	C-pentosyl-chrysoeriol 7-O-feruloylhexoside	Flavone C-glycosides
Hov209	N-Feruloyl spermidine	Phenolamides
Hov657	N-hexosyl-p-coumaroyl putrescine	Phenolamides
Hov170	N',N",N"'-p-coumaroyl-cinnamoyl-caffeoyl spermidine	Phenolamides
Hov692	N-Feruloyl agmatine	Phenolamides
Hov133	N-(4'-O-glycosyl)-feruloyl agmatine	Phenolamides
Hov740	Apigenin 7-O-glucoside (Cosmosiin)	Flavone
Hov39	Apigenin 6-C-hexosyl-8-C-hexosyl-O-hexoside	Flavone C-glycosides
Hov270	6-C-hexosyl-luteolin O-hexoside	Flavone C-glycosides
Hov128	C-hexosyl-luteolin C-pentoside	Flavone C-glycosides
Hov273	6-C-hexosyl-hesperetin O-hexoside	Flavone C-glycosides
Hov43	C-pentosyl apigenin O-salicyloyl hexoside	Flavone C-glycosides
Hov126	8-C-hexosyl-apigenin O-feruloylhexoside	Flavone C-glycosides
Hov174	Chrysoeriol 8-C-hexoside	Flavone C-glycosides
Hov45	6-C-hexosyl-chrysoeriol O-feruloylhexoside	Flavone C-glycosides
Hov154	Quercetin 7-O-rutinoside	Flavonol
Hov36	Anisic acid O-feruloyl hexoside	Others
Hov748	4-Methyl-5-thiazoleethanol	Others
Hov1238	N-p-Coumaroyl hydroxyagmatine	Phenolamides
Hov50	N-Glycyl-L-leucine	Amino acid derivatives
Hov421	D-Pantothenic dcid	Organic acids
Hov1033	L-ascorbate	Vitamins
Hov1040	L-Gulonic-¦Ã-lactone	Carbohydrates
Hov1075	6-Hydroxy-4-methylcoumarin	Coumarins
Hov1168	Deoxyribose 5-phosphate	Nucleotide and its derivates
Hov235	Genistein 7-O-Glucoside (Genistin)	Isoflavone
Hov105	Vitexin 2''-O-beta-L-rhamnoside	Flavone C-glycosides
