# Supplementary material for: Time-Course Comparative Metabolite Profiling under Osmotic Stress in Tolerant and Sensitive Tibetan Hulless Barley
Source: Biomed Res Int. 2018 Dec 23;2018:9415409. doi: 10.1155/2018/9415409 (PMC6323448; doi:10.1155/2018/9415409)
Supplement: Supplementary Materials — Supplementary Table S1: list of metabolites composing the core metabolome responsive to osmotic stress in hulless barley. Supplementary Table S2: list of the differentially changed metabolites between XL and D at 1 h. Supplementary Table S3: list of the differentially changed metabolites between XL and D at 4 h. Supplementary Table S4: list of the differentially changed metabolites between XL and D at 8 h. Supplementary Table S5: list of the differentially changed metabolites between XL and D at 24 h. Supplementary Table S6: list of the differentially changed metabolites between XL and D at 48 h. Supplementary Table S7: shared and specific differentially changed metabolites between XL and D at the different time points. Supplementary Figure S1: the top 20 differentially changed metabolites during the different time points in D. Supplementary Figure S2: the top 20 differentially changed metabolites during the different time points in XL. Supplementary Figure S3: KEGG enrichment of differentially changed metabolites at 1 h between XL and D. Supplementary Figure S4: KEGG enrichment of differentially changed metabolites at 4 h between XL and D. Supplementary Figure S5: KEGG enrichment of differentially changed metabolites at 8 h between XL and D. Supplementary Figure S6: KEGG enrichment of differentially changed metabolites at 24 h between XL and D. Supplementary Figure S7: KEGG enrichment of differentially changed metabolites at 48 h between XL and D. [file 9415409.f1.zip › 9415409.f2.xlsx]

## Sheet: Feuil1
Index	Compounds	Class	DS_1h_1	DS_1h_2	DS_1h_3	XLS_1h_1	XLS_1h_2	XLS_1h_3	VIP	Fold_Change	LogFC	type
Hov191	N-Caffeoyl agmatine	Phenolamides	1180000	1040000	1020000	395000	532000	327000	1.24916	0.387037	-1.36946	down
Hov474	Selgin 5-O-hexoside	Flavone	9	9	552000	1950000	2570000	4900000	3.40017	17.0647	4.09294	up
Hov741	Chrysoeriol 5-O-hexoside	Flavone	7780000	8430000	7770000	19300000	16900000	41700000	1.28697	3.24854	1.69979	up
Hov243	N-sinapoyl cadaverine	Phenolamides	51800	104000	118000	991000	506000	170000	1.48336	6.08839	2.60606	up
Hov445	Cinnamoyl tyramine	Tryptamine derivatives	13000	18100	124000	9	9	9	3.68592	0.000174081	-12.488	down
Hov129	Ayanin	Flavonol	259000	575000	441000	1190000	859000	2760000	1.32561	3.77176	1.91524	up
Hov825	E-3,4,5'-Trihydroxy-3'-glucopyranosylstilbene	Others	16900	19200	19600	10200	3750	7190	1.24254	0.379533	-1.3977	down
Hov230	Isorhamnetin O-hexoside	Flavonol	1340000	1330000	1170000	3000000	2170000	3580000	1.13001	2.27865	1.18818	up
Hov223	Benzamide	Others	3040000	3470000	6100000	9170000	7510000	15000000	1.14384	2.51229	1.329	up
Hov406	N-Acetyl tryptamine	Phenolamides	830000	1630000	1530000	2480000	2390000	5070000	1.10022	2.49123	1.31686	up
Hov691	O-Feruloyl coumarin	Coumarins	158000	155000	99900	7400000	13600000	10200000	2.69352	75.5631	6.23961	up
Hov257	Sinapoylcholine	Cholines	425000	453000	446000	1710000	987000	1120000	1.28242	2.88293	1.52754	up
Hov377	O-Feruloyl 4-hydroxylcoumarin	Coumarins	4340000	4510000	7130000	1900000	1860000	1970000	1.2715	0.358573	-1.47966	down
Hov52	N-(4'-O-glycosyl)-p-coumaroyl agmatine	Phenolamides	35700000	31500000	30100000	12100000	13000000	7420000	1.34366	0.334224	-1.58111	down
Hov144	Malvidin	Anthocyanins	700000	936000	1380000	1550000	4100000	3130000	1.19611	2.91114	1.54158	up
Hov264	Syringetin 5-O-hexoside	Flavone	858000	722000	678000	2500000	1750000	3860000	1.39775	3.59167	1.84466	up
Hov232	Isorhamnetin 5-O-hexoside	Flavonol	1340000	1370000	1150000	3050000	2390000	4320000	1.19268	2.5285	1.33828	up
Hov268	Syringetin 7-O-hexoside	Flavone	901000	773000	693000	2740000	1880000	4580000	1.42817	3.88678	1.95857	up
Hov135	6-C-hexosyl luteolin O-pentoside	Flavone C-glycosides	396000	375000	602000	9	9	9	4.2712	1.9665e-05	-15.634	down
Hov763	C-hexosyl-apigenin O-pentoside	Flavone C-glycosides	7930000	11100000	10900000	9	9	9	4.84421	9.02105e-07	-20.0802	down
Hov385	di-C,C-hexosyl-apigenin	Flavone C-glycosides	26800000	24200000	37800000	9	9	9	5.02834	3.04054e-07	-21.6492	down
Hov123	Apigenin 6-C-pentoside	Flavone C-glycosides	104000	71100	9	198000	119000	125000	1.77408	2.52414	1.33579	up
Hov118	Tricin 5-O-hexosyl-O-hexoside	Flavone	1590000	1610000	1450000	4650000	2440000	6790000	1.2155	2.98495	1.5777	up
Hov281	Tricin 7-O-hexosyl-O-hexoside	Flavone	4910000	4650000	4640000	17300000	7440000	8130000	1.02161	2.31479	1.21088	up
Hov130	Tricin 7-O-feruloylhexoside	Flavone	9	9	9	56100	51100	101000	3.87471	7711.11	12.9127	up
Hov448	Tricin 7-O-¦Â-guaiacylglycerol	Flavonolignan	212000	165000	246000	40000	44800	34000	1.65809	0.19069	-2.3907	down
Hov749	D-erythro-Dihydrosphingosine	Others	7610000	12400000	7370000	24800000	10600000	51100000	1.09532	3.15924	1.65958	up
Hov139	N-Cinnamoyl serotonin	Tryptamine derivatives	679000	3950000	16200000	205000	935000	414000	1.61575	0.0746075	-3.74454	down
Hov37	N-Feruloyl tryptamine	Tryptamine derivatives	378000	344000	278000	2010000	2970000	2630000	1.84197	7.61	2.9279	up
Hov42	Isoquinoline	Alkaloids	1480000	1860000	6360000	1200000	522000	1420000	1.07071	0.323918	-1.6263	down
Hov292	Indole	Indole derivatives	1590000	2820000	9	9	9	9	3.10083	6.12244e-06	-17.3175	down
Hov830	7-hydroxycoumarin-beta-rhamnoside	Coumarins	221000	383000	440000	211000	5800	198000	1.2736	0.397318	-1.33163	down
Hov831	3,4-Dimethoxycinnamic acid	Hydroxycinnamoyl derivatives	48200	60700	48000	53100	2490	20900	1.13897	0.487508	-1.0365	down
Hov1153	Argininosuccinate	Organic acids	28200	30500	33400	8740	1050	8740	1.63626	0.201194	-2.31334	down
Hov845	4-Methoxycinnamic acid	Hydroxycinnamoyl derivatives	9810	143000	22400	52700	9	6450	1.60583	0.337646	-1.56642	down
Hov848	Citramalate	Organic acids	62900	26200	80400	47700	9	17800	1.67384	0.386484	-1.37152	down
Hov1126	Protocatechuic acid O-glucoside	Catechin derivatives	12600000	22200000	16000000	3510000	1570000	4520000	1.64258	0.188976	-2.40372	down
Hov788	2,5-dihydroxy benzoic acid O-hexside	Benzoic acid derivatives	9820000	12600000	8300000	2720000	1320000	3090000	1.53867	0.232096	-2.1072	down
Hov858	Gallic acid O-Hexoside	Benzoic acid derivatives	7530000	8470000	6570000	2180000	1200000	1890000	1.55329	0.233496	-2.09853	down
Hov1141	Hesperetin O-malonylhexoside	Flavanone	9	9	9	251000	28800	275000	3.99024	20548.1	14.3267	up
Hov1275	Acetyl-eriodictyol O-hexoside	Flavone	182000	203000	185000	113000	9	55400	1.88362	0.295454	-1.75899	down
Hov869	Luteolin O-hexosyl-O-gluconic acid	Flavone	9	9	3550	9	9	9	1.25413	0.00756726	-7.04601	down
Hov873	Chrysoeriol O-hexosyl-O-hexosyl-O-Glucuronic acid	Flavone	1430000	1150000	1730000	938000	43400	642000	1.28423	0.376659	-1.40867	down
Hov881	Chrysoeriol O-homovanillic acid	Flavone	9	9	9	7650	18600	2660	3.33161	1070.74	10.0644	up
Hov893	Eudesmoyl quinic acid	Quinate and its derivatives	56200	52200	33500	16500	29900	14900	1.10807	0.431994	-1.21092	down
Hov1132	1-O-p-Coumaroyl quinic acid	Quinate and its derivatives	7310	19800	13100	160000	9	3780	1.04071	4.07334	2.02621	up
Hov895	3-O-p-coumaroyl shikimic acid O-hexoside	Quinate and its derivatives	60100	125000	102000	48800	18600	60200	1.03887	0.444444	-1.16993	down
Hov897	3-O-p-Coumaroyl shikimic acid	Quinate and its derivatives	5200	13700	7050	7220	2060	9	1.6267	0.357958	-1.48214	down
Hov898	Glucarate O-Phosphoric acid	Carbohydrates	370000	217000	527000	258000	9	163000	1.80363	0.377925	-1.40383	down
Hov901	Esculetin O-quinacyl esculetin O-quinic acid	Coumarins	6810000	11100000	13200000	3920000	15500	2600000	1.76406	0.210077	-2.25101	down
Hov902	Diethyl phosphate	Organic acids	198000	175000	143000	74700	6120	98300	1.3161	0.347132	-1.52644	down
Hov1308	N-p-Coumaroyl hydroxydehydroagmatine	Phenolamides	483000	465000	219000	4660000	3670000	8760000	2.09416	14.6444	3.87228	up
Hov1278	L-Cysteinyl-L-leucylglycyl-L-alanylglycylglycyl-L-alanylglycyl-L-cysteine	Amino acid derivatives	23500	57500	46000	12100	9	22200	1.7805	0.27015	-1.88817	down
Hov1197	4-Hydroxy-7-methoxycoumarin-beta-rhamnoside	Coumarins	14000	25100	28700	14100	9	13000	1.58075	0.399838	-1.32251	down
Hov184	LysoPC 18:0	Lipids_Glycerophospholipids	2610000	3610000	3470000	7710000	6390000	7400000	1.13667	2.21878	1.14977	up
Hov732	L-Proline	Amino acids	899000	9	27000000	3070000	699000	743000	1.24425	0.161726	-2.62837	down
Hov493	Thymine	Nucleotide and its derivates	1100000	1090000	2300000	167000	215000	340000	1.69491	0.160802	-2.63664	down
Hov1280	Pyrrole-2-carboxylic acid	Amino acid derivatives	12300	14300	9420	8510	9	9	2.47547	0.236757	-2.07852	down
Hov499	5-Aminovaleric acid	Amino acid derivatives	47800	9	59500	151000	115000	65500	1.78128	3.08921	1.62724	up
Hov661	Phenylacetyl-L-glutamine	Amino acid derivatives	45200	76200	487000	66900	9	55800	1.76873	0.201691	-2.30978	down
Hov506	Methyl jasmonate	Phytohormones	71500	201000	67400	9	73700	58900	1.64904	0.390141	-1.35793	down
Hov1348	Sebacate	Organic acids	1930	9	6280	2430	9	9	1.14197	0.297846	-1.74736	down
Hov311	Naringenin	Flavanone	381000	299000	273000	1590000	862000	1760000	1.52754	4.41973	2.14396	up
Hov96	Menaquinone (K2)	Vitamins	3020000	1650000	2530000	4460000	35200000	6090000	1.33881	6.35417	2.6677	up
Hov976	Glutathione reduced form	Amino acid derivatives	99400	187000	144000	60400	9	46400	1.89594	0.248162	-2.01064	down
Hov316	Pantothenol	Alcohols and polyols	166000	190000	265000	79700	82300	64500	1.27104	0.364734	-1.45508	down
Hov986	Xanthosine	Nucleotide and its derivates	3550000	3880000	7640000	2410000	162000	2440000	1.30643	0.332581	-1.58822	down
Hov1240	L-Pipecolic acid	Amino acid derivatives	37100	22800	183000	65900	9	42800	1.46993	0.447546	-1.15989	down
Hov317	1-Methyladenosine	Nucleotide and its derivates	13200	11800	9	9	9	9	2.37054	0.00107961	-9.85527	down
Hov60	Delphinidin 3-O-glucoside (Mirtillin)	Anthocyanins	9	9	146000	436000	555000	390000	3.0938	9.45774	3.2415	up
Hov539	Kumatakenin	Flavonol	307000	384000	412000	1530000	1690000	3420000	1.67446	6.01995	2.58975	up
Hov999	Baicalein (5,6,7-Trihydroxyflavone)	Flavone	4250	9	9	3580	1520	4320	2.07757	2.20712	1.14217	up
Hov323	Acacetin	Flavone	32700	47600	30000	156000	128000	307000	1.60836	5.35811	2.42173	up
Hov805	Hesperetin 5-O-glucoside	Flavanone	36300	25500	44600	124000	39100	228000	1.15138	3.67575	1.87804	up
Hov1009	7-O-Methyleriodictyol	Flavanone	9	9	1590	4430	9	5570	1.30284	6.2245	2.63796	up
Hov1013	Coniferyl alcohol	Hydroxycinnamoyl derivatives	29600	57200	45700	30300	9	9	2.68083	0.228815	-2.12775	down
Hov806	Salicylic acid (SA)	Phytohormones	2830000	4560000	6010000	1240000	9	865000	2.2408	0.15709	-2.67033	down
Hov542	sakuranetin	Flavone	433000	347000	381000	1420000	987000	3740000	1.50505	5.29457	2.40451	up
Hov1021	2,5-dihydroxybenzoic acid (Gentisic acid)	Benzoic acid derivatives	14800	12500	12200	13800	9	9	2.41542	0.349823	-1.5153	down
Hov1030	2-Hydroxybutanoic acid	Organic acids	74600	91800	218000	72300	9	65200	1.71981	0.357724	-1.48308	down
Hov780	Citric acid	Organic acids	54800000	31800000	65400000	52200000	722000	18400000	1.25211	0.469224	-1.09165	down
Hov424	Dihydrozeatin (DZ)	Phytohormones	9	9	728000	9	9	9	1.7244	3.7087e-05	-14.7187	down
Hov1328	Gibberellin A4 (GA4)	Phytohormones	1290	1200	2730	9	9	1950	1.96193	0.377011	-1.40732	down
Hov1140	Citraconic acid	Organic acids	299000	500000	1450000	656000	9	310000	1.76158	0.429528	-1.21918	down
Hov656	Hesperetin	Flavanone	155000	53900	95800	908000	919000	2060000	2.03661	12.7568	3.6732	up
Hov760	Phenethylamine	Others	2730000	3000000	5200000	7830000	6510000	12800000	1.13849	2.48307	1.31213	up
Hov558	(5-L-Glutamyl)-L-amino acid	Amino acid derivatives	165000	110000	475000	758000	562000	357000	1.04978	2.236	1.16092	up
Hov1050	3,4-Dihydroxybenzeneacetic acid	Organic acids	659000	641000	745000	388000	9	453000	1.83394	0.411251	-1.28191	down
Hov1051	3-Hydroxypropanoic acid	Organic acids	10200	12000	13900	8820	9	8390	1.47611	0.476981	-1.068	down
Hov625	Enterodiol	Alcohols and polyols	9	9	9	126000	113000	171000	4.0269	15185.2	13.8904	up
Hov776	N-Methyltryptamine	Tryptamine derivatives	21900000	18700000	14900000	75800000	95300000	160000000	1.69214	5.96577	2.57671	up
Hov1057	2,3-Dihydroxybenzoic acid	Organic acids	42700	72700	63500	9	9	42300	2.676	0.236546	-2.07981	down
Hov1207	(+)-Dihydrojasmonic acid	Phytohormones	31500	73600	87600	56600	9	36700	1.57776	0.484219	-1.04627	down
Hov809	Flavin adenine dinucleotide (FAD)	Nucleotide and its derivates	482000	502000	367000	206000	32200	264000	1.23574	0.371725	-1.42769	down
Hov1299	O-Phosphorylethanolamine	Others	18500	17200	20000	6390	16700	4320	1.04637	0.492101	-1.02297	down
Hov353	Naringenin chalcone	Flavanone	349000	250000	293000	1360000	705000	1400000	1.44888	3.88453	1.95774	up
Hov1070	Uridine 5¡¯-diphosphate	Nucleotide and its derivates	30400	40600	23000	20300	9	13800	1.65583	0.362862	-1.46251	down
Hov650	N-Acetylcysteine	Amino acid derivatives	264000	272000	385000	597000	456000	917000	1.01998	2.13898	1.09692	up
Hov578	GIBBERELLIN A9	Phytohormones	9	9	102000	9	9	9	1.5673	0.000264659	-11.8836	down
Hov811	Quercetin 4'-O-glucoside (Spiraeoside)	Flavonol	18000	28800	35200	101000	30600	241000	1.20946	4.5439	2.18393	up
Hov1077	D-Glucose 6-phosphate	Carbohydrates	1220000	1400000	1040000	523000	9	355000	2.04938	0.239893	-2.05954	down
Hov1186	Uridine 5'-monophosphate	Nucleotide and its derivates	1100000	901000	1270000	563000	311000	486000	1.17532	0.415775	-1.26613	down
Hov1189	N-acetylglycine	Amino acid derivatives	9	9	14500	11500	4070	17800	2.22357	2.29853	1.20071	up
Hov1081	trans,trans-Muconic acid	Organic acids	1710000	1480000	763000	1880000	14800000	1640000	1.01239	4.63445	2.2124	up
Hov812	Quercetin 3-O-glucoside (Isotrifoliin)	Flavonol	20900	35300	52600	102000	37100	242000	1.07952	3.50276	1.80849	up
Hov105	Vitexin 2''-O-beta-L-rhamnoside	Flavone C-glycosides	4140000	5480000	6110000	495000	154000	353000	2.16092	0.0636999	-3.97256	down
Hov1084	Calycosin	Isoflavone	9	9	9	7530	9	15200	2.3772	842.185	9.71799	up
Hov361	Biochanin A	Isoflavone	22400	37000	25600	124000	94600	229000	1.59899	5.26588	2.39668	up
Hov1086	Glycitein	Isoflavone	2890	9	9	7590	9	14200	1.43012	7.49622	2.90616	up
Hov799	Afzelechin (3,5,7,4'-Tetrahydroxyflavan)	Flavanone	228000	371000	383000	107000	18500	78000	1.59773	0.20723	-2.27069	down
Hov1093	Tricetin	Flavone	9	9	9	8240	9	23100	2.41821	1161.07	10.1812	up
Hov1167	D-Fructose 6-phosphate	Carbohydrates	348000	400000	296000	154000	9	100000	1.9713	0.243304	-2.03917	down
Hov1143	Aminophylline	Alkaloids	11600	9	9	37500	5880	13600	2.48578	4.90446	2.29409	up
Hov367	Sissotrin	Isoflavone	67600	72700	44300	220000	95800	184000	1.17741	2.70748	1.43695	up
Hov1104	Eudesmic acid (3,4,5-trimethoxybenzoic acid)	Benzoic acid derivatives	24700	18100	18700	9	9	9	3.60686	0.000439024	-11.1534	down
Hov1107	Sinapinaldehyde	Hydroxycinnamoyl derivatives	174000	214000	233000	123000	21400	138000	1.0813	0.45475	-1.13685	down
Hov593	Butin	Flavone	409000	277000	357000	1560000	864000	1530000	1.44885	3.79099	1.92257	up
Hov374	Pantetheine	Vitamins	6310000	7780000	7900000	2170000	2860000	9	2.20691	0.228741	-2.12821	down
