# Supplementary material for: Time-Course Comparative Metabolite Profiling under Osmotic Stress in Tolerant and Sensitive Tibetan Hulless Barley
Source: Biomed Res Int. 2018 Dec 23;2018:9415409. doi: 10.1155/2018/9415409 (PMC6323448; doi:10.1155/2018/9415409)
Supplement: Supplementary Materials — Supplementary Table S1: list of metabolites composing the core metabolome responsive to osmotic stress in hulless barley. Supplementary Table S2: list of the differentially changed metabolites between XL and D at 1 h. Supplementary Table S3: list of the differentially changed metabolites between XL and D at 4 h. Supplementary Table S4: list of the differentially changed metabolites between XL and D at 8 h. Supplementary Table S5: list of the differentially changed metabolites between XL and D at 24 h. Supplementary Table S6: list of the differentially changed metabolites between XL and D at 48 h. Supplementary Table S7: shared and specific differentially changed metabolites between XL and D at the different time points. Supplementary Figure S1: the top 20 differentially changed metabolites during the different time points in D. Supplementary Figure S2: the top 20 differentially changed metabolites during the different time points in XL. Supplementary Figure S3: KEGG enrichment of differentially changed metabolites at 1 h between XL and D. Supplementary Figure S4: KEGG enrichment of differentially changed metabolites at 4 h between XL and D. Supplementary Figure S5: KEGG enrichment of differentially changed metabolites at 8 h between XL and D. Supplementary Figure S6: KEGG enrichment of differentially changed metabolites at 24 h between XL and D. Supplementary Figure S7: KEGG enrichment of differentially changed metabolites at 48 h between XL and D. [file 9415409.f1.zip › 9415409.f3.xlsx]

## Sheet: Feuil1
Index	Compounds	Class	DS_4h_1	DS_4h_2	DS_4h_3	XLS_4h_1	XLS_4h_2	XLS_4h_3	VIP	Fold_Change	LogFC	type
Hov474	Selgin 5-O-hexoside	Flavone	9	342000	530000	2550000	6690000	4860000	2.29792	16.1696	4.01521	up
Hov741	Chrysoeriol 5-O-hexoside	Flavone	832000	8570000	9040000	17900000	16700000	35100000	1.30986	3.77942	1.91816	up
Hov161	Kaempferide	Flavonol	124000	605000	466000	1410000	1340000	927000	1.20327	3.07699	1.62152	up
Hov412	Tricin O-vanilloylhexoside	Flavone	41800	325000	264000	778000	792000	457000	1.2239	3.21338	1.68409	up
Hov61	3',4',5'-Dihydrotricetin O-hexosyl-O-hexoside	Flavone	16000	177000	184000	331000	330000	244000	1.07527	2.40053	1.26335	up
Hov129	Ayanin	Flavonol	16300	790000	626000	1130000	985000	1660000	1.21799	2.63562	1.39814	up
Hov164	Luteolin 6-C-glucoside	Flavone C-glycosides	151000	756000	850000	1250000	2380000	984000	1.04076	2.62607	1.3929	up
Hov121	C-pentosyl-chrysoeriol 7-O-feruloylhexoside	Flavone C-glycosides	514000	4810000	3430000	6100000	7390000	7500000	1.06941	2.39776	1.26169	up
Hov823	Velutin	Flavone	105000	83300	108000	450000	511000	320000	1.41023	4.32332	2.11214	up
Hov63	Tricin O-glycerylhexoside	Flavone	159000	431000	412000	1050000	2640000	830000	1.31541	4.51098	2.17344	up
Hov230	Isorhamnetin O-hexoside	Flavonol	223000	1010000	925000	2330000	2740000	3120000	1.33834	3.79518	1.92417	up
Hov406	N-Acetyl tryptamine	Phenolamides	165000	979000	1850000	1660000	3280000	5360000	1.2184	3.44021	1.7825	up
Hov165	Caffeic aldehyde	Hydroxycinnamoyl derivatives	310000	327000	110000	61200	47600	72700	1.2675	0.242972	-2.04114	down
Hov691	O-Feruloyl coumarin	Coumarins	9	200000	117000	37500000	15100000	8770000	2.93875	193.591	7.59687	up
Hov51	Tricin	Flavone	3400000	22700000	18200000	44900000	64200000	36400000	1.23767	3.28442	1.71564	up
Hov745	MAG (18:1) isomer2	Lipids_Glycerolipids	308000	1300000	3960000	5020000	3230000	5460000	1.11396	2.46228	1.3	up
Hov259	2-Aminoethylphosphonate	Others	9	96700	143000	162000	305000	206000	1.64725	2.80757	1.48932	up
Hov209	N-Feruloyl spermidine	Phenolamides	1830000	16000000	24100000	39400000	50700000	30200000	1.18413	2.86907	1.52058	up
Hov117	Luteolin O-feruloylhexoside	Flavone C-glycosides	9	9	9	68100	74900	122000	3.58651	9814.81	13.2607	up
Hov261	Adenosine 3'-monophosphate	Nucleotide and its derivates	134000	355000	219000	569000	650000	457000	1.04958	2.36723	1.2432	up
Hov144	Malvidin	Anthocyanins	234000	1290000	1750000	4380000	1790000	2690000	1.07426	2.70617	1.43625	up
Hov172	Peonidin	Anthocyanins	148000	442000	384000	994000	1070000	839000	1.20084	2.98049	1.57555	up
Hov264	Syringetin 5-O-hexoside	Flavone	97900	429000	640000	1840000	1550000	2150000	1.46279	4.74762	2.24721	up
Hov265	Apigenin O-hexosyl-O-pentoside	Flavone	4900000	17600000	12000000	33000000	32500000	33200000	1.18236	2.86087	1.51645	up
Hov21	Chrysoeriol O-hexosyl-O-rutinoside	Flavone	32300	228000	217000	362000	346000	393000	1.03245	2.30673	1.20585	up
Hov232	Isorhamnetin 5-O-hexoside	Flavonol	235000	1230000	928000	2330000	2860000	3530000	1.31089	3.64396	1.86551	up
Hov746	Chrysoeriol 7-O-rutinoside	Flavone	810000	4240000	4100000	9020000	8620000	7620000	1.14681	2.76066	1.46501	up
Hov57	Chrysoeriol O-hexosyl-O-pentoside	Flavone	5030000	24600000	15500000	56500000	51500000	42500000	1.26881	3.33481	1.7376	up
Hov268	Syringetin 7-O-hexoside	Flavone	92300	459000	743000	2700000	1870000	2750000	1.55066	5.65557	2.49967	up
Hov70	Chrysoeriol O-hexosyl-O-hexoside	Flavone	44500	335000	260000	696000	679000	598000	1.22581	3.08522	1.62537	up
Hov740	Apigenin 7-O-glucoside (Cosmosiin)	Flavone	262000	2940000	3060000	5440000	7870000	6150000	1.23742	3.10763	1.63582	up
Hov58	Chrysoeriol 7-O-hexoside	Flavone	422000	1860000	2310000	6130000	8990000	6840000	1.46009	4.78223	2.25768	up
Hov269	Chrysoeriol 6-C-hexoside 8-C-hexoside-O-hexoside	Flavone C-glycosides	35200	95600	103000	1060000	1010000	556000	1.82105	11.2318	3.48952	up
Hov486	C-hexosyl-isorhamnetin O-hexoside	Flavone C-glycosides	259000	851000	214000	9	260000	9	2.68521	0.196388	-2.34822	down
Hov135	6-C-hexosyl luteolin O-pentoside	Flavone C-glycosides	21300	218000	185000	9	9	9	3.58501	6.36342e-05	-13.9398	down
Hov272	Luteolin C-hexoside	Flavone C-glycosides	176000	711000	853000	1400000	2350000	967000	1.06305	2.71092	1.43878	up
Hov763	C-hexosyl-apigenin O-pentoside	Flavone C-glycosides	653000	3490000	3190000	9	9	9	4.14604	3.68199e-06	-18.0511	down
Hov385	di-C,C-hexosyl-apigenin	Flavone C-glycosides	1140000	15800000	10100000	478000	9	9	3.30759	0.0176782	-5.82189	down
Hov275	Chrysoeriol C-hexosyl-O-rhamnoside	Flavone C-glycosides	543000	3080000	2820000	6980000	6110000	5730000	1.18347	2.921	1.54646	up
Hov399	6-C-hexosyl-apigenin O-sinapoylhexoside	Flavone C-glycosides	1470000	7410000	9410000	14700000	16700000	14700000	1.08996	2.5205	1.33371	up
Hov277	6-C-hexosyl-apigenin O-feruloylhexoside	Flavone C-glycosides	75200	419000	402000	699000	649000	650000	1.00116	2.22941	1.15666	up
Hov123	Apigenin 6-C-pentoside	Flavone C-glycosides	9	9	9	148000	207000	93400	3.68388	16607.4	14.0195	up
Hov444	8-C-hexosyl-chrysoeriol O-feruloylhexoside	Flavone C-glycosides	512000	4350000	6110000	15100000	14700000	10000000	1.32183	3.62742	1.85894	up
Hov440	C-hexosyl-chrysoeriol O-sinapoylhexoside	Flavone C-glycosides	946000	4960000	4590000	10600000	12800000	5950000	1.10374	2.7963	1.48352	up
Hov126	8-C-hexosyl-apigenin O-feruloylhexoside	Flavone C-glycosides	525000	5290000	3360000	6270000	7580000	6990000	1.03963	2.27139	1.18358	up
Hov146	C-hexosyl-apigenin O-cinnamoylhexoside	Flavone C-glycosides	9	39300	39300	95800	65700	62400	1.58182	2.84827	1.51009	up
Hov74	Luteolin C-hexosyl-O-rhamnoside O-hexoside	Flavone C-glycosides	63000	310000	271000	2360000	2830000	698000	1.65188	9.14286	3.19265	up
Hov75	C-hexosyl-apigenin C-pentoside	Flavone C-glycosides	503000	1720000	2980000	3470000	4640000	3690000	1.0135	2.26792	1.18137	up
Hov142	C-hexosyl-chrysoeriol O-rutinoside	Flavone C-glycosides	15100	41000	29500	110000	54900	62400	1.07169	2.65537	1.40891	up
Hov76	8-C-hexosyl chrysoeriol O-hexoside	Flavone C-glycosides	276000	652000	584000	1200000	1470000	997000	1.05942	2.42526	1.27814	up
Hov174	Chrysoeriol 8-C-hexoside	Flavone C-glycosides	310000	1350000	2640000	6590000	7690000	4730000	1.42737	4.42093	2.14435	up
Hov118	Tricin 5-O-hexosyl-O-hexoside	Flavone	162000	881000	962000	3840000	4110000	4100000	1.58449	6.00998	2.58736	up
Hov281	Tricin 7-O-hexosyl-O-hexoside	Flavone	641000	1650000	1900000	7830000	18100000	7500000	1.64518	7.97662	2.99578	up
Hov419	Tricin 4'-O-(¦Â-guaiacylglyceryl) ether 5-O-hexoside	Flavonolignan	179000	281000	278000	673000	903000	449000	1.11461	2.7439	1.45623	up
Hov624	Tricin di-O-hexoside	Flavone	76700	384000	412000	1630000	2690000	1340000	1.58719	6.48562	2.69724	up
Hov175	Tricin O-malonylhexoside	Flavone	229000	964000	1210000	6570000	6530000	2190000	1.51579	6.36288	2.66968	up
Hov2	Tricin 4'-O-(¦Â-guaiacylglyceryl) ether O-hexoside	Flavonolignan	596000	5650000	8090000	23600000	28500000	13500000	1.43063	4.57589	2.19405	up
Hov130	Tricin 7-O-feruloylhexoside	Flavone	9	9	9	149000	155000	60600	3.63596	13503.7	13.7211	up
Hov427	Tricin O-glycerol	Flavone	359000	2640000	2780000	7770000	12300000	6290000	1.41842	4.56134	2.18946	up
Hov34	Tricin 5-O-rutinoside	Flavone	1400000	8900000	7050000	12600000	16100000	13200000	1.05766	2.41499	1.27201	up
Hov79	Tricin 7-O-hexoside	Flavone	1990000	9950000	9850000	24500000	52000000	33800000	1.46061	5.06196	2.33969	up
Hov756	Tricin O-sinapoylhexoside	Flavone	144000	1330000	540000	1320000	2800000	907000	1.01274	2.49603	1.31963	up
Hov201	Tricin O-hexosyl-O-syringin alcohol	Flavone	1400000	12500000	14200000	25500000	35000000	19900000	1.16562	2.86121	1.51663	up
Hov677	Tricin O-phenylformic acid	Flavone	103000	775000	801000	1270000	1380000	1140000	1.01968	2.2573	1.1746	up
Hov721	Tricin 4'-O-syringyl alcohol	Flavonolignan	397000	2070000	1890000	3330000	5440000	3200000	1.11523	2.7473	1.45802	up
Hov722	N-Feruloyl serotonin	Tryptamine derivatives	253000	6490000	11200000	6360000	22300000	14100000	1.08438	2.3831	1.25284	up
Hov37	N-Feruloyl tryptamine	Tryptamine derivatives	42400	528000	486000	2990000	2220000	1640000	1.61475	6.48429	2.69695	up
Hov42	Isoquinoline	Alkaloids	107000	229000	1940000	526000	2320000	1940000	1.00302	2.10281	1.07232	up
Hov25	LysoPE 18:0 (2n isomer)	Lipids_Glycerophospholipids	5610	36600	43700	32500	123000	85500	1.03159	2.80526	1.48814	up
Hov488	LysoPE 18:0	Lipids_Glycerophospholipids	129000	786000	494000	1910000	943000	947000	1.07941	2.69695	1.43133	up
Hov291	iP7G	Nucleotide and its derivates	132000	170000	67900	385000	1300000	573000	1.48203	6.10435	2.60984	up
Hov177	Adenosine 5'-monophosphate	Nucleotide and its derivates	42000	394000	194000	536000	597000	377000	1.06686	2.39683	1.26112	up
Hov292	Indole	Indole derivatives	3490000	9	9	4770000	3120000	2850000	2.9181	3.07735	1.62169	up
Hov179	Phellodensin F	Others	9	9	92900	133000	556000	193000	2.73481	9.49224	3.24675	up
Hov207	Tricin 4'-O-(¦Â-guaiacylglyceryl) ether 5-O-hexosyl-O-hexoside	Flavonolignan	90500	327000	437000	2260000	3730000	2000000	1.75562	9.3505	3.22504	up
Hov757	LysoPC 10:0	Lipids_Glycerophospholipids	9	81200	9	63000	9	151000	1.236	2.63499	1.3978	up
Hov26	LysoPC 19:0	Lipids_Glycerophospholipids	51800	1880000	677000	3090000	562000	5080000	1.11714	3.34713	1.74293	up
Hov752	MAG (18:1) isomer1	Lipids_Glycerolipids	325000	1470000	4050000	5030000	3650000	5680000	1.11192	2.4568	1.29678	up
Hov828	Syringaldehyde O-glucoside	Others	53700	35300	45900	282000	168000	103000	1.30351	4.09933	2.03539	up
Hov836	Anthranilate O-hexosyl-O-hexoside	Benzoic acid derivatives	9	1380	2560	10900	24500	10400	1.96362	11.5979	3.53579	up
Hov841	9-HOTrE	Lipids_Fatty acids	4980000	1240000	964000	667000	588000	720000	1.00154	0.274916	-1.86293	down
Hov846	12,13-EODE	Lipids_Fatty acids	425000	197000	145000	118000	89000	62900	1.04284	0.35189	-1.5068	down
Hov847	13-HPODE	Lipids_Fatty acids	2820000	853000	1050000	624000	269000	390000	1.18005	0.271649	-1.88018	down
Hov1126	Protocatechuic acid O-glucoside	Catechin derivatives	28400000	23400000	12100000	11500000	5140000	4290000	1.15492	0.327543	-1.61024	down
Hov855	Kynurenic acid O-hexside	Organic acids	281000	188000	231000	1390000	1270000	1110000	1.53202	5.38571	2.42914	up
Hov860	Disinapoyl hexoside	Hydroxycinnamoyl derivatives	599000	678000	420000	209000	126000	132000	1.31554	0.275192	-1.86149	down
Hov1141	Hesperetin O-malonylhexoside	Flavanone	9	9	9	66500	162000	153000	3.64842	14129.6	13.7864	up
Hov869	Luteolin O-hexosyl-O-gluconic acid	Flavone	9	10100	5510	9	9	9	2.10705	0.00172866	-9.17613	down
Hov881	Chrysoeriol O-homovanillic acid	Flavone	9	9	9	7020	4970	10600	3.06096	836.667	9.70851	up
Hov882	Eriodictyol C-hexoside	Flavone C-glycosides	9	9	14700	27300	36200	19100	2.3949	5.61218	2.48856	up
Hov892	5-O-p-coumaroyl quinic acid O-hexoside	Quinate and its derivatives	19400	6640	15200	83600	148000	18400	1.28914	6.06208	2.59981	up
Hov894	3-O-p-coumaroyl quinic acid O-hexoside	Quinate and its derivatives	18800	12300	15100	148000	161000	34200	1.48819	7.42857	2.89308	up
Hov1132	1-O-p-Coumaroyl quinic acid	Quinate and its derivatives	16500	14700	9630	136000	140000	9720	1.13467	6.9978	2.8069	up
Hov801	3-O-p-Coumaroyl quinic acid	Quinate and its derivatives	15700	13400	12600	80000	64300	16500	1.10712	3.85612	1.94715	up
Hov897	3-O-p-Coumaroyl shikimic acid	Quinate and its derivatives	6540	9	9760	13600	23800	9590	1.45121	2.88123	1.52669	up
Hov898	Glucarate O-Phosphoric acid	Carbohydrates	144000	111000	9	249000	386000	336000	1.78265	3.80771	1.92892	up
Hov903	2-Isopropylmalate	Organic acids	577000	1740000	673000	3660000	2500000	1910000	1.11247	2.699	1.43242	up
Hov1308	N-p-Coumaroyl hydroxydehydroagmatine	Phenolamides	741000	496000	557000	12800000	4380000	4960000	1.79657	12.3411	3.6254	up
Hov1278	L-Cysteinyl-L-leucylglycyl-L-alanylglycylglycyl-L-alanylglycyl-L-cysteine	Amino acid derivatives	84200	40000	37100	20800	8410	24500	1.12544	0.332982	-1.58648	down
Hov1197	4-Hydroxy-7-methoxycoumarin-beta-rhamnoside	Coumarins	27000	32600	25100	5970	9020	14700	1.18043	0.350531	-1.51238	down
Hov184	LysoPC 18:0	Lipids_Glycerophospholipids	307000	4050000	2460000	7190000	5170000	3780000	1.05314	2.36761	1.24343	up
Hov106	Hesperetin 7-O-neohesperidoside (Neohesperidin)	Flavanone	42800	123000	158000	411000	489000	463000	1.40208	4.20939	2.07361	up
Hov405	Purine	Nucleotide and its derivates	368000	3930000	4330000	6960000	9180000	5520000	1.0946	2.51043	1.32794	up
Hov1169	Cucurbitacin E	Terpenoids	19300	12300	10700	3740	4800	7780	1.08287	0.385816	-1.37402	down
Hov499	5-Aminovaleric acid	Amino acid derivatives	9	63600	48800	103000	88100	96200	1.57284	2.55585	1.3538	up
Hov468	Kaempferol	Flavonol	3210	11800	11600	42300	60000	46500	1.53919	5.59188	2.48333	up
Hov506	Methyl jasmonate	Phytohormones	9	66800	87300	9	67400	9	1.19907	0.43747	-1.19275	down
Hov509	N-Acetyl-l-leucine	Amino acid derivatives	38500	225000	255000	349000	496000	590000	1.13211	2.7676	1.46863	up
Hov631	Naringenin 7-O-neohesperidoside (Naringin)	Flavanone	19200	99200	93900	261000	334000	196000	1.31191	3.72586	1.89757	up
Hov521	Chrysoeriol	Flavone	113000	469000	286000	892000	1140000	598000	1.18006	3.02995	1.5993	up
Hov310	Apigenin 7-rutinoside (Isorhoifolin)	Flavone	913000	3230000	3930000	8850000	9210000	7510000	1.23387	3.16735	1.66328	up
Hov219	Kaempferol 3-O-rutinoside (Nicotiflorin)	Flavonol	52100	228000	295000	536000	851000	494000	1.22974	3.27074	1.70962	up
Hov94	Naringenin 7-O-glucoside (Prunin)	Flavanone	126000	301000	279000	638000	653000	688000	1.17439	2.80312	1.48703	up
Hov311	Naringenin	Flavanone	36700	205000	605000	900000	1660000	1420000	1.49204	4.7006	2.23285	up
Hov522	Apigenin	Flavone	35200	207000	131000	412000	558000	311000	1.26635	3.43248	1.77925	up
Hov1289	3,4,5-Trimethoxycinnamic acid	Hydroxycinnamoyl derivatives	39200	25400	24600	8920	9510	9540	1.24205	0.313565	-1.67316	down
Hov119	N-Methylnicotinamide	Nicotinic acid derivatives	9	56300	32300	61000	82000	100000	1.58774	2.74239	1.45543	up
Hov970	D-(+)-Sucrose	Carbohydrates	103000	19100	19700	91800	298000	201000	1.35114	4.16643	2.05881	up
Hov60	Delphinidin 3-O-glucoside (Mirtillin)	Anthocyanins	9	9	9	632000	438000	394000	3.90922	54222.2	15.7266	up
Hov539	Kumatakenin	Flavonol	36900	398000	554000	2640000	2580000	1810000	1.67323	7.10891	2.82963	up
Hov999	Baicalein (5,6,7-Trihydroxyflavone)	Flavone	15900	7930	9360	4770	9	5000	1.51483	0.294637	-1.76299	down
Hov323	Acacetin	Flavone	7380	75500	54900	158000	208000	170000	1.36712	3.89026	1.95987	up
Hov1007	Eriodictyol	Flavanone	2480	9	3930	11500	27700	15400	1.85473	8.506	3.08848	up
Hov805	Hesperetin 5-O-glucoside	Flavanone	52900	32400	77400	160000	184000	169000	1.2479	3.15304	1.65674	up
Hov1012	Arctiin	Others	188000	111000	127000	41800	48000	53600	1.19481	0.33662	-1.57081	down
Hov330	Indole 3-acetic acid (IAA)	Phytohormones	9	138000	221000	176000	367000	298000	1.60264	2.34256	1.22809	up
Hov806	Salicylic acid (SA)	Phytohormones	7370000	8750000	6850000	3240000	2200000	1650000	1.268	0.308663	-1.69589	down
Hov542	sakuranetin	Flavone	48000	400000	930000	1120000	2910000	2490000	1.45582	4.73149	2.2423	up
Hov543	Nicotinic Acid Methyl Ester (Methyl Nicotinate)	Vitamins	9	67400	187000	159000	187000	188000	1.58279	2.09898	1.06969	up
Hov1021	2,5-dihydroxybenzoic acid (Gentisic acid)	Benzoic acid derivatives	16600	30100	20700	14200	12800	9	1.45284	0.400727	-1.31931	down
Hov424	Dihydrozeatin (DZ)	Phytohormones	9	85100	64200	9	9	9	2.44262	0.000180833	-12.4331	down
Hov1328	Gibberellin A4 (GA4)	Phytohormones	2940	2910	1810	1870	1000	9	1.33873	0.375849	-1.41178	down
Hov383	Orotic acid	Vitamins	9	663000	1040000	1610000	1800000	1570000	1.79345	2.92424	1.54806	up
Hov1040	L-Gulonic-¦Ã-lactone	Carbohydrates	17300	43400	11200	7580	9	22100	1.42977	0.412921	-1.27606	down
Hov656	Hesperetin	Flavanone	17800	138000	315000	1010000	1650000	1610000	1.79302	9.06967	3.18105	up
Hov472	Luteolin 7-O-glucoside (Cynaroside)	Flavone	9	611000	252000	883000	841000	1100000	1.81312	3.27227	1.71029	up
Hov558	(5-L-Glutamyl)-L-amino acid	Amino acid derivatives	59400	211000	252000	297000	829000	738000	1.21204	3.56815	1.83518	up
Hov776	N-Methyltryptamine	Tryptamine derivatives	1890000	18400000	24000000	83400000	70900000	106000000	1.57915	5.87717	2.55512	up
Hov1221	Vitamin D3	Vitamins	15500	8850	6010	9	9	6660	2.20369	0.21996	-2.18468	down
Hov1057	2,3-Dihydroxybenzoic acid	Organic acids	113000	77600	58000	50900	43400	9	1.55956	0.37936	-1.39836	down
Hov349	S-(5'-Adenosyl)-L-methionine	Amino acid derivatives	1110000	18200000	17600000	27800000	33400000	27700000	1.10611	2.40856	1.26817	up
Hov570	Dihydromyricetin	Flavonol	57200	306000	338000	759000	1540000	1310000	1.47432	5.14689	2.3637	up
Hov1064	Hesperetin 7-rutinoside (Hesperidin)	Flavanone	24900	19400	28100	67200	102000	81100	1.29684	3.45718	1.7896	up
Hov353	Naringenin chalcone	Flavanone	51300	213000	510000	744000	1370000	1310000	1.42764	4.42206	2.14472	up
Hov1270	Gibberellin A53	Phytohormones	9	9	10500	11400	8240	20400	2.20596	3.80681	1.92858	up
Hov578	GIBBERELLIN A9	Phytohormones	9	23500	9	43100	9	23200	1.17947	2.8195	1.49544	up
Hov811	Quercetin 4'-O-glucoside (Spiraeoside)	Flavonol	41400	25800	57500	150000	155000	162000	1.34849	3.74499	1.90496	up
Hov682	L-Palmitoylcarnitine	Others	9	21900	10200	44200	25500	14200	1.47026	2.61297	1.38569	up
Hov1078	D-Sedoheptuiose 7-phosphate	Carbohydrates	140000	127000	9	241000	331000	294000	1.72713	3.24334	1.69748	up
Hov580	Cyclic AMP	Nucleotide and its derivates	9	1110000	9	5380000	1760000	2090000	3.02793	8.31518	3.05575	up
Hov235	Genistein 7-O-Glucoside (Genistin)	Isoflavone	225000	2390000	2420000	4520000	6890000	4800000	1.2507	3.21946	1.68682	up
Hov812	Quercetin 3-O-glucoside (Isotrifoliin)	Flavonol	56400	34800	54400	149000	192000	168000	1.31122	3.49588	1.80566	up
Hov361	Biochanin A	Isoflavone	9	65300	49000	120000	161000	136000	1.71122	3.64801	1.86711	up
Hov1086	Glycitein	Isoflavone	9	4880	5230	8010	9000	10700	1.43315	2.73841	1.45334	up
Hov221	Kaempferol 3-O-galactoside (Trifolin)	Flavonol	128000	588000	337000	965000	806000	1470000	1.19503	3.07787	1.62193	up
Hov799	Afzelechin (3,5,7,4'-Tetrahydroxyflavan)	Flavanone	597000	502000	532000	259000	132000	219000	1.15372	0.374004	-1.41888	down
Hov1093	Tricetin	Flavone	9	9	9	6460	17600	14800	3.17371	1439.26	10.4911	up
Hov586	8-Hydroxy-2-deoxyguanosine	Nucleotide and its derivates	14300	193000	68500	266000	100000	367000	1.06414	2.65772	1.41019	up
Hov1143	Aminophylline	Alkaloids	18400	9	6980	21400	21900	15000	1.44192	2.29627	1.19929	up
Hov367	Sissotrin	Isoflavone	9	108000	133000	109000	205000	183000	1.52468	2.06216	1.04416	up
Hov1104	Eudesmic acid (3,4,5-trimethoxybenzoic acid)	Benzoic acid derivatives	33500	37000	26000	9	9	9	3.3877	0.000279793	-11.8034	down
Hov592	Butein	Flavanone	9	97600	73700	116000	139000	93900	1.5072	2.03667	1.02621	up
Hov1109	Homoeriodictyol	Flavanone	19500	15600	28400	74800	114000	111000	1.45439	4.72126	2.23917	up
Hov593	Butin	Flavone	36600	231000	575000	827000	1550000	1390000	1.45238	4.47069	2.1605	up
Hov374	Pantetheine	Vitamins	9	9000000	8590000	3130000	2750000	1730000	1.26016	0.432632	-1.20879	down
Hov594	Anthranilic acid	Benzoic acid derivatives	9	284000	317000	757000	385000	820000	1.74553	3.26451	1.70687	up
Hov376	2-(dimethylamino)guanosine	Nucleotide and its derivates	976000	3530000	1310000	4450000	5660000	4610000	1.11234	2.53095	1.33968	up
