# Supplementary material for: Time-Course Comparative Metabolite Profiling under Osmotic Stress in Tolerant and Sensitive Tibetan Hulless Barley
Source: Biomed Res Int. 2018 Dec 23;2018:9415409. doi: 10.1155/2018/9415409 (PMC6323448; doi:10.1155/2018/9415409)
Supplement: Supplementary Materials — Supplementary Table S1: list of metabolites composing the core metabolome responsive to osmotic stress in hulless barley. Supplementary Table S2: list of the differentially changed metabolites between XL and D at 1 h. Supplementary Table S3: list of the differentially changed metabolites between XL and D at 4 h. Supplementary Table S4: list of the differentially changed metabolites between XL and D at 8 h. Supplementary Table S5: list of the differentially changed metabolites between XL and D at 24 h. Supplementary Table S6: list of the differentially changed metabolites between XL and D at 48 h. Supplementary Table S7: shared and specific differentially changed metabolites between XL and D at the different time points. Supplementary Figure S1: the top 20 differentially changed metabolites during the different time points in D. Supplementary Figure S2: the top 20 differentially changed metabolites during the different time points in XL. Supplementary Figure S3: KEGG enrichment of differentially changed metabolites at 1 h between XL and D. Supplementary Figure S4: KEGG enrichment of differentially changed metabolites at 4 h between XL and D. Supplementary Figure S5: KEGG enrichment of differentially changed metabolites at 8 h between XL and D. Supplementary Figure S6: KEGG enrichment of differentially changed metabolites at 24 h between XL and D. Supplementary Figure S7: KEGG enrichment of differentially changed metabolites at 48 h between XL and D. [file 9415409.f1.zip › 9415409.f4.xlsx]

## Sheet: Feuil1
Index	Compounds	Class	DS_8h_1	DS_8h_2	DS_8h_3	XLS_8h_1	XLS_8h_2	XLS_8h_3	VIP	Fold_Change	LogFC	type
Hov195	O-Sinapoyl quinic acid	Quinate and its derivatives	9	9	9	132000	152000	161000	2.98507	16481.5	14.0086	up
Hov474	Selgin 5-O-hexoside	Flavone	141000	432000	9	4990000	2800000	4120000	1.94396	20.785	4.37747	up
Hov741	Chrysoeriol 5-O-hexoside	Flavone	3590000	3030000	3550000	24800000	23300000	29600000	1.363	7.64012	2.93359	up
Hov412	Tricin O-vanilloylhexoside	Flavone	754000	1080000	803000	189000	126000	174000	1.23245	0.185438	-2.43099	down
Hov61	3',4',5'-Dihydrotricetin O-hexosyl-O-hexoside	Flavone	122000	9	54900	165000	254000	287000	1.43986	3.99075	1.99666	up
Hov755	Tricin 4'-O-(¦Â-guaiacylglyceryl) ether-O-rutinoside	Flavonolignan	114000	185000	167000	14000	31300	26500	1.29504	0.154077	-2.69827	down
Hov823	Velutin	Flavone	57000	79100	98200	540000	415000	491000	1.28776	6.17157	2.62564	up
Hov825	E-3,4,5'-Trihydroxy-3'-glucopyranosylstilbene	Others	9	9	9	5490	5580	9240	2.45855	752.222	9.55502	up
Hov230	Isorhamnetin O-hexoside	Flavonol	684000	480000	684000	2990000	2010000	2600000	1.12483	4.11255	2.04003	up
Hov380	3-Hydroxykynurenine	Amino acid derivatives	341000	596000	371000	1600000	1430000	1740000	1.08167	3.64679	1.86663	up
Hov406	N-Acetyl tryptamine	Phenolamides	888000	1250000	769000	3800000	7260000	4320000	1.20292	5.29068	2.40345	up
Hov66	LysoPC 16:1	Lipids_Glycerophospholipids	37200000	33500000	42400000	1340000	1680000	5510000	1.5611	0.07542	-3.72891	down
Hov479	N2-methylguanosine	Nucleotide and its derivates	20100000	28400000	23900000	2310000	2860000	3420000	1.39317	0.118646	-3.07526	down
Hov691	O-Feruloyl coumarin	Coumarins	161000	7260000	118000	16400000	14900000	11600000	1.53913	5.69041	2.50853	up
Hov169	Aminopurine	Others	9	9	9	6970000	12100000	13900000	3.58082	1.22111e+06	20.2198	up
Hov117	Luteolin O-feruloylhexoside	Flavone C-glycosides	9	9	9	311000	257000	144000	3.04813	26370.4	14.6866	up
Hov480	Hydroxy-methoxycinnamate	Hydroxycinnamoyl derivatives	817000	547000	327000	11500000	5400000	9680000	1.57211	15.7185	3.97439	up
Hov482	Aspartic acid di-O-glucoside	Amino acid derivatives	3350	40200	94800	4960000	6950000	647000	1.97468	90.7626	6.50403	up
Hov664	N',N""-p-coumaroyl-feruloyl putrescine	Phenolamides	1100000	1390000	3020000	357000	731000	97700	1.12486	0.215191	-2.21631	down
Hov171	Nicotinic acid adenine dinucleotide	Nucleotide and its derivates	15500	54900	127000	578000	486000	140000	1.19547	6.09929	2.60864	up
Hov144	Malvidin	Anthocyanins	600000	1200000	690000	6650000	4620000	2990000	1.22612	5.72691	2.51776	up
Hov264	Syringetin 5-O-hexoside	Flavone	321000	300000	272000	1360000	2160000	1220000	1.21181	5.30795	2.40815	up
Hov232	Isorhamnetin 5-O-hexoside	Flavonol	829000	457000	768000	2760000	2060000	3190000	1.09643	3.89971	1.96337	up
Hov268	Syringetin 7-O-hexoside	Flavone	368000	314000	327000	1980000	2860000	1620000	1.28476	6.40238	2.67861	up
Hov486	C-hexosyl-isorhamnetin O-hexoside	Flavone C-glycosides	853000	9	298000	9	9	9	2.17255	2.34577e-05	-15.3796	down
Hov135	6-C-hexosyl luteolin O-pentoside	Flavone C-glycosides	129000	58800	93500	9	9	9	2.90463	9.59829e-05	-13.3469	down
Hov763	C-hexosyl-apigenin O-pentoside	Flavone C-glycosides	2320000	1860000	2530000	9	9	9	3.37594	4.02385e-06	-17.923	down
Hov385	di-C,C-hexosyl-apigenin	Flavone C-glycosides	8390000	1680000	6810000	9	9	9	3.46805	1.59953e-06	-19.2539	down
Hov118	Tricin 5-O-hexosyl-O-hexoside	Flavone	549000	560000	476000	3220000	4010000	4020000	1.33746	7.09779	2.82737	up
Hov281	Tricin 7-O-hexosyl-O-hexoside	Flavone	454000	585000	398000	5020000	3180000	7250000	1.44573	10.7516	3.42647	up
Hov130	Tricin 7-O-feruloylhexoside	Flavone	9	54900	9	96900	106000	109000	2.09628	5.67938	2.50573	up
Hov79	Tricin 7-O-hexoside	Flavone	7060000	6270000	6770000	23100000	23300000	19800000	1.0425	3.29353	1.71964	up
Hov448	Tricin 7-O-¦Â-guaiacylglycerol	Flavonolignan	49600	47400	91200	10100	9	21800	1.47111	0.169548	-2.56023	down
Hov283	O-Feruloyl quinic acid	Quinate and its derivatives	356000	934000	238000	1310000	2450000	1640000	1.04025	3.53403	1.82131	up
Hov749	D-erythro-Dihydrosphingosine	Others	30600000	28100000	95700000	1820000	2670000	21700000	1.26788	0.169624	-2.55958	down
Hov722	N-Feruloyl serotonin	Tryptamine derivatives	5690000	8450000	7780000	29000000	86400000	11900000	1.02095	5.80748	2.53791	up
Hov37	N-Feruloyl tryptamine	Tryptamine derivatives	251000	9	347000	2690000	2550000	1970000	1.78609	12.0567	3.59176	up
Hov694	Niacinamide	Vitamins	4520000	4250000	3690000	17900000	17100000	12200000	1.09028	3.78812	1.92148	up
Hov723	LysoPC 18:3	Lipids_Glycerophospholipids	20000000	22500000	23200000	1920000	2240000	8820000	1.23511	0.197565	-2.3396	down
Hov724	LysoPC 16:0	Lipids_Glycerophospholipids	39000000	41800000	43900000	4810000	4870000	20400000	1.15246	0.241219	-2.05158	down
Hov751	LysoPE 14:0	Lipids_Glycerophospholipids	17800000	22600000	24400000	1610000	1750000	8180000	1.27891	0.178086	-2.48935	down
Hov289	LysoPC 14:0	Lipids_Glycerophospholipids	24000000	25100000	35600000	5030000	6200000	10900000	1.08907	0.261275	-1.93636	down
Hov768	LysoPE 18:2 (2n isomer)	Lipids_Glycerophospholipids	28200000	22000000	29200000	6900000	5340000	8150000	1.10633	0.256801	-1.96128	down
Hov25	LysoPE 18:0 (2n isomer)	Lipids_Glycerophospholipids	286000	296000	622000	13000	13600	59400	1.55743	0.0714286	-3.80735	down
Hov83	LysoPC 18:1	Lipids_Glycerophospholipids	63000000	67700000	78400000	21800000	25800000	18600000	1.02011	0.316595	-1.65929	down
Hov488	LysoPE 18:0	Lipids_Glycerophospholipids	5040000	5280000	7470000	137000	159000	947000	1.61046	0.0698707	-3.83917	down
Hov3	Punicic acid	Lipids_Fatty acids	5630000	8640000	8180000	1390000	2450000	1510000	1.12874	0.238307	-2.0691	down
Hov84	trans-zeatin 9-O-glucoside	Phytohormones	9	9	9	368000	641000	696000	3.17897	63148.1	15.9465	up
Hov291	iP7G	Nucleotide and its derivates	9	26400	66500	1910000	4440000	1020000	2.16335	79.3249	6.3097	up
Hov179	Phellodensin F	Others	9	9	9	349000	169000	222000	3.05511	27407.4	14.7423	up
Hov207	Tricin 4'-O-(¦Â-guaiacylglyceryl) ether 5-O-hexosyl-O-hexoside	Flavonolignan	261000	266000	180000	1150000	651000	1660000	1.14544	4.89533	2.29141	up
Hov181	Octadecadien-6-ynoic acid	Lipids_Fatty acids	21100000	60100000	42000000	5640000	6990000	7720000	1.2174	0.165179	-2.5979	down
Hov757	LysoPC 10:0	Lipids_Glycerophospholipids	96600	119000	161000	9	54700	9	2.14016	0.145295	-2.78295	down
Hov182	4-Hydroxysphinganine	Lipids_Fatty acids	145000000	167000000	249000000	17400000	25700000	77300000	1.17624	0.214617	-2.22017	down
Hov296	Phytocassane C	Terpenoids	20400000	23600000	42800000	2450000	3590000	11000000	1.1956	0.196313	-2.34877	down
Hov297	LysoPC 15:1	Lipids_Glycerophospholipids	1470000	1490000	1770000	412000	313000	608000	1.06745	0.281818	-1.82716	down
Hov88	LysoPC 15:0	Lipids_Glycerophospholipids	177000000	172000000	238000000	12800000	19700000	43400000	1.37135	0.129302	-2.95119	down
Hov598	PC 19:2/16:0	Lipids_Glycerophospholipids	748000	730000	696000	26900	37900	298000	1.35835	0.166881	-2.58311	down
Hov298	LysoPC 17:0	Lipids_Glycerophospholipids	72100000	86800000	125000000	2080000	2990000	12300000	1.62869	0.0611835	-4.03071	down
Hov826	2-Deoxyribose 1-phosphate	Carbohydrates	7220	22800	9	36900	42300	16500	1.28361	3.18692	1.67216	up
Hov827	5-O-Feruloyl quinic acid glucoside	Quinate and its derivatives	50500	100000	55100	318000	346000	269000	1.17066	4.53794	2.18204	up
Hov830	7-hydroxycoumarin-beta-rhamnoside	Coumarins	393000	405000	326000	74100	185000	104000	1.00075	0.323043	-1.6302	down
Hov836	Anthranilate O-hexosyl-O-hexoside	Benzoic acid derivatives	3580	5040	1950	22700	13800	25500	1.24809	5.86566	2.55229	up
Hov838	4-hydroxycoumarin di-glucoside	Coumarins	8990	9	9780	13000	9500	21100	1.11602	2.32174	1.21521	up
Hov839	9,10-EODE	Lipids_Fatty acids	24000000	41000000	37100000	5730000	7760000	4990000	1.23181	0.180999	-2.46595	down
Hov841	9-HOTrE	Lipids_Fatty acids	2580000	5600000	4980000	410000	807000	899000	1.25455	0.16079	-2.63675	down
Hov842	9-KODE	Lipids_Fatty acids	442000	602000	488000	113000	190000	168000	1.02506	0.307441	-1.70162	down
Hov1139	13-HpOTrE(r)	Lipids_Fatty acids	98900	382000	92000	25600	9920	18800	1.34459	0.0948158	-3.39873	down
Hov846	12,13-EODE	Lipids_Fatty acids	466000	643000	462000	97300	152000	110000	1.15152	0.228708	-2.12842	down
Hov847	13-HPODE	Lipids_Fatty acids	2220000	4980000	5360000	401000	618000	366000	1.37878	0.110271	-3.18088	down
Hov849	3-O-Feruloyl quinic acid glucoside	Quinate and its derivatives	9	91700	46800	249000	279000	248000	1.53088	5.60252	2.48608	up
Hov1185	L-Glutamine O-hexside	Amino acid derivatives	70100	134000	117000	20600	22900	16200	1.21211	0.185923	-2.42722	down
Hov857	Uridine 5'-diphospho-D-glucose	Nucleotide and its derivates	273000	175000	196000	2410000	1920000	4340000	1.51497	13.4627	3.7509	up
Hov781	1-O-beta-D-Glucopyranosyl sinapate	Hydroxycinnamoyl derivatives	801000	372000	194000	10500000	11200000	16500000	1.7592	27.9444	4.80449	up
Hov1297	2'-Deoxyinosine	Nucleotide and its derivates	195000	257000	251000	9	9	9	3.05391	3.84068e-05	-14.6683	down
Hov1141	Hesperetin O-malonylhexoside	Flavanone	9	9	9	64300	99100	163000	2.92391	12088.9	13.5614	up
Hov1275	Acetyl-eriodictyol O-hexoside	Flavone	137000	124000	140000	33000	21100	60400	1.0593	0.285536	-1.80825	down
Hov869	Luteolin O-hexosyl-O-gluconic acid	Flavone	24100	33800	39600	9	9	2600	2.22221	0.0268513	-5.21887	down
Hov882	Eriodictyol C-hexoside	Flavone C-glycosides	9	11600	11900	28200	17600	35500	1.27141	3.45825	1.79004	up
Hov885	Tricin O-saccharic acid	Flavone	73800	123000	44300	273000	223000	334000	1.03958	3.44255	1.78348	up
Hov1142	Tricin 5-O-hexoside	Flavone	17900	18100	16300	61400	88700	63900	1.12333	4.09178	2.03273	up
Hov1159	Tricin 4'-O-(syringyl alcohol) ether 5-O-hexoside	Flavonolignan	620000	443000	592000	123000	67700	265000	1.06835	0.275347	-1.86067	down
Hov892	5-O-p-coumaroyl quinic acid O-hexoside	Quinate and its derivatives	5950	6090	8580	84300	57300	31900	1.34972	8.41416	3.07282	up
Hov893	Eudesmoyl quinic acid	Quinate and its derivatives	9	23400	9	42800	29200	31400	1.94029	4.41541	2.14255	up
Hov894	3-O-p-coumaroyl quinic acid O-hexoside	Quinate and its derivatives	8820	14800	11300	194000	88500	55100	1.36303	9.66781	3.27319	up
Hov1132	1-O-p-Coumaroyl quinic acid	Quinate and its derivatives	2270	7430	9	83600	38000	44700	1.76481	17.1284	4.09832	up
Hov1233	N-Acetylglucosamine 1-phosphate	Others	42100	18400	32500	111000	115000	147000	1.11403	4.01075	2.00387	up
Hov898	Glucarate O-Phosphoric acid	Carbohydrates	34800	61100	11500	159000	111000	115000	1.05678	3.58473	1.84186	up
Hov782	LysoPE 16:0	Lipids_Glycerophospholipids	236000000	210000000	237000000	16000000	15700000	71600000	1.34053	0.151245	-2.72505	down
Hov1308	N-p-Coumaroyl hydroxydehydroagmatine	Phenolamides	89200	1060000	58600	9720000	10100000	10900000	1.84424	25.4347	4.66872	up
Hov1278	L-Cysteinyl-L-leucylglycyl-L-alanylglycylglycyl-L-alanylglycyl-L-cysteine	Amino acid derivatives	46900	24100	34400	3610	7430	13200	1.12577	0.229981	-2.12041	down
Hov1222	Guanosine 5'-monophosphate	Nucleotide and its derivates	106000	197000	96600	14400	27500	25800	1.23725	0.169419	-2.56133	down
Hov1197	4-Hydroxy-7-methoxycoumarin-beta-rhamnoside	Coumarins	28100	33700	21200	5500	11200	8180	1.02399	0.299759	-1.73812	down
Hov300	Succinyladenosine	Nucleotide and its derivates	2410000	5040000	1780000	9380000	7430000	17900000	1.03168	3.76056	1.91095	up
Hov912	Adenosine	Nucleotide and its derivates	9	74100	9	173000	234000	232000	2.21981	8.62139	3.10792	up
Hov152	LysoPC 16:0 (2n isomer)	Lipids_Glycerophospholipids	213000000	187000000	242000000	23500000	30200000	69900000	1.22695	0.192523	-2.37689	down
Hov184	LysoPC 18:0	Lipids_Glycerophospholipids	23600000	21100000	34300000	790000	963000	3290000	1.60434	0.0638354	-3.9695	down
Hov185	LysoPC 20:1 (2n isomer)	Lipids_Glycerophospholipids	11900000	11600000	16100000	1780000	2400000	1490000	1.32848	0.143182	-2.80408	down
Hov186	LysoPC 20:1	Lipids_Glycerophospholipids	13800000	11200000	16200000	1870000	2720000	1450000	1.3204	0.146602	-2.77002	down
Hov914	LysoPE 14:0 (2n isomer)	Lipids_Glycerophospholipids	2550000	2550000	2920000	153000	213000	846000	1.34221	0.151122	-2.72621	down
Hov784	LysoPE 16:0 (2n isomer)	Lipids_Glycerophospholipids	189000000	172000000	183000000	16600000	16600000	76400000	1.23221	0.201471	-2.31136	down
Hov106	Hesperetin 7-O-neohesperidoside (Neohesperidin)	Flavanone	123000	121000	91800	481000	388000	349000	1.07629	3.62716	1.85884	up
Hov772	L-(+)-Lysine	Amino acids	6370000	6720000	12500000	1180000	1100000	426000	1.4107	0.105744	-3.24135	down
Hov90	Cytosine	Nucleotide and its derivates	3930000	7600000	15100000	1830000	2880000	762000	1.08868	0.205483	-2.28291	down
Hov93	5-Methylcytosine	Nucleotide and its derivates	5380000	7700000	10500000	913000	1560000	850000	1.31787	0.140925	-2.82701	down
Hov303	¦Ã-Glu-Cys	Amino acid derivatives	1640000	1850000	1330000	383000	268000	425000	1.16225	0.223237	-2.16336	down
Hov502	Asp-phe	Amino acid derivatives	13900000	20200000	21700000	739000	1450000	1590000	1.56692	0.067724	-3.88419	down
Hov666	Methyl indole-3-acetate	Phytohormones	218000	103000	182000	9	124000	106000	1.24698	0.457274	-1.12887	down
Hov638	¦Â-Nicotinamide mononucleotide	Nucleotide and its derivates	9	40200	37500	145000	190000	188000	1.54641	6.73024	2.75066	up
Hov607	2-Hydroxy-6-aminopurine	Nucleotide and its derivates	66700000	85700000	80400000	14800000	16100000	12200000	1.23959	0.185137	-2.43333	down
Hov50	N-Glycyl-L-leucine	Amino acid derivatives	47400000	63400000	74900000	5370000	9630000	6030000	1.40553	0.113247	-3.14245	down
Hov716	L-Glutamine	Amino acids	28100000	33800000	56300000	5290000	6500000	3360000	1.34541	0.128173	-2.96384	down
Hov54	Quercetin 3-O-rutinoside (Rutin)	Flavonol	57400	142000	98700	72300	9	47100	1.24272	0.400567	-1.31988	down
Hov506	Methyl jasmonate	Phytohormones	52300	91300	30800	9	9	43600	1.96125	0.250103	-1.9994	down
Hov1160	2¨Cfuranoic acid	Organic acids	9	88400	9	65100	61600	96100	1.94543	2.51985	1.33334	up
Hov636	5-Methyluridine	Nucleotide and its derivates	3360000	4350000	5420000	1120000	1050000	982000	1.12608	0.240061	-2.05853	down
Hov397	Thymidine	Nucleotide and its derivates	8490000	9400000	13700000	2200000	2690000	2020000	1.16158	0.21874	-2.19271	down
Hov1348	Sebacate	Organic acids	7170	8440	8960	2930	3040	1970	1.00701	0.323158	-1.62969	down
Hov1133	Ferulic acid	Hydroxycinnamoyl derivatives	13400000	13800000	18600000	2970000	2010000	2030000	1.30441	0.153057	-2.70786	down
Hov790	Chlorogenic acid (3-O-Caffeoylquinic acid)	Quinate and its derivatives	9	9	9	31000	46600	64500	2.79569	5262.96	12.3617	up
Hov220	Vanillin	Benzoic acid derivatives	962000	994000	628000	2900000	4020000	2520000	1.06563	3.65325	1.86918	up
Hov962	3-(4-Hydroxyphenyl)propionic acid	Hydroxycinnamoyl derivatives	122000	139000	188000	22000	48900	30100	1.15284	0.224944	-2.15236	down
Hov963	3-Hydroxy-4-methoxycinnamic acid	Hydroxycinnamoyl derivatives	12600000	13500000	17300000	2560000	1960000	1890000	1.31829	0.147696	-2.7593	down
Hov1289	3,4,5-Trimethoxycinnamic acid	Hydroxycinnamoyl derivatives	46300	25900	45600	12300	10000	7920	1.07964	0.256537	-1.96276	down
Hov315	L-Theanine	Amino acids	471000	496000	245000	110000	110000	78800	1.08406	0.246535	-2.02014	down
Hov119	N-Methylnicotinamide	Nicotinic acid derivatives	33500	31200	9	59900	40500	102000	1.28047	3.12785	1.64517	up
Hov965	Nicotinic acid	Nicotinic acid derivatives	2310000	3000000	2810000	575000	521000	242000	1.27954	0.164778	-2.6014	down
Hov970	D-(+)-Sucrose	Carbohydrates	5020	3370	9	492000	644000	480000	2.3357	192.404	7.58799	up
Hov1336	3-Chloro-L-tyrosine	Amino acid derivatives	9	9	2670	4980	2820	5860	1.71323	5.08185	2.34535	up
Hov701	Deoxyguanosine	Nucleotide and its derivates	23500000	31600000	47400000	3460000	6160000	3420000	1.35134	0.12722	-2.97461	down
Hov531	Deoxycytidine	Nucleotide and its derivates	31000000	46300000	53400000	5050000	7890000	4150000	1.35141	0.130757	-2.93503	down
Hov695	L-Methionine	Amino acids	6430000	7380000	9910000	2870000	2120000	1400000	1.07359	0.269393	-1.89222	down
Hov630	S-(methyl)glutathione	Amino acid derivatives	566000	861000	1490000	158000	152000	166000	1.23096	0.163181	-2.61545	down
Hov1302	Pyridoxine 5'-phosphate	Vitamins	19400	30900	30000	9	9	9	2.70519	0.000336239	-11.5382	down
Hov317	1-Methyladenosine	Nucleotide and its derivates	59000	215000	34000	9	9	9	2.86982	8.76623e-05	-13.4777	down
Hov60	Delphinidin 3-O-glucoside (Mirtillin)	Anthocyanins	9	413000	206000	1070000	769000	625000	1.49028	3.98056	1.99297	up
Hov538	L-Methionine methyl ester	Amino acid derivatives	927000	745000	1090000	214000	160000	153000	1.22246	0.190804	-2.38984	down
Hov602	p-Coumaric acid	Hydroxycinnamoyl derivatives	2640000	3970000	2990000	954000	553000	500000	1.18389	0.209063	-2.25799	down
Hov539	Kumatakenin	Flavonol	451000	629000	722000	2020000	1550000	2010000	1.00378	3.09656	1.63067	up
Hov999	Baicalein (5,6,7-Trihydroxyflavone)	Flavone	19400	70100	22800	3840	3590	4220	1.33839	0.10374	-3.26896	down
Hov805	Hesperetin 5-O-glucoside	Flavanone	30400	54600	31900	204000	109000	183000	1.11646	4.24294	2.08507	up
Hov1009	7-O-Methyleriodictyol	Flavanone	9	9	3050	3620	3260	4790	1.65641	3.80378	1.92743	up
Hov1015	Pinoresinol	Hydroxycinnamoyl derivatives	71700	140000	69900	10300	9500	18800	1.31696	0.137074	-2.86697	down
Hov806	Salicylic acid (SA)	Phytohormones	17800000	9610000	10900000	1590000	1390000	1600000	1.37309	0.119551	-3.0643	down
Hov421	D-Pantothenic dcid	Organic acids	109000	160000	228000	30500	28900	49900	1.1377	0.21992	-2.18495	down
Hov1021	2,5-dihydroxybenzoic acid (Gentisic acid)	Benzoic acid derivatives	72800	43600	118000	13400	9	9	2.19148	0.057244	-4.12673	down
Hov335	2-Aminoethanesulfonic acid	Organic acids	2020000	2900000	4720000	410000	1040000	372000	1.19515	0.189004	-2.40351	down
Hov337	N6-Isopentenyladenine (iP)	Phytohormones	798000	1370000	1670000	104000	92200	83200	1.52665	0.0727983	-3.77995	down
Hov100	cis-Zeatin (cZ)	Phytohormones	2080000	2520000	2830000	136000	148000	188000	1.5877	0.0635262	-3.9765	down
Hov424	Dihydrozeatin (DZ)	Phytohormones	522000	638000	1320000	9	9	9	3.2253	1.08871e-05	-16.487	down
Hov1328	Gibberellin A4 (GA4)	Phytohormones	1850	9	1930	9	9	9	1.52064	0.00712589	-7.13271	down
Hov101	Histamine	Amino acid derivatives	2950000	6330000	9420000	1310000	1980000	834000	1.08062	0.220535	-2.18092	down
Hov1040	L-Gulonic-¦Ã-lactone	Carbohydrates	13800	9	11600	22700	32800	13800	1.18864	2.72738	1.44752	up
Hov1223	Guanosine monophosphate	Nucleotide and its derivates	145000	339000	154000	41500	35600	46900	1.16172	0.194357	-2.36322	down
Hov1172	Mandelic acid	Organic acids	12600	9	9400	22600	34400	23300	1.29818	3.64851	1.86731	up
Hov347	5-Hydroxyindole-3-acetic acid	Indole derivatives	9	9	9	917000	1310000	796000	3.26322	111963	16.7727	up
Hov625	Enterodiol	Alcohols and polyols	9	9	9	128000	71500	136000	2.93481	12425.9	13.6011	up
Hov1221	Vitamin D3	Vitamins	9	9	6330	7300	11900	5930	1.74941	3.95873	1.98504	up
Hov561	N-Acetylputrescine	Phenolamides	1330000	2080000	2470000	628000	799000	352000	1.00054	0.302551	-1.72475	down
Hov669	Phe-Phe	Amino acid derivatives	16000000	17500000	21900000	1730000	3010000	2770000	1.34892	0.13556	-2.883	down
Hov1057	2,3-Dihydroxybenzoic acid	Organic acids	139000	74900	147000	34700	59500	9	1.38255	0.261039	-1.93766	down
Hov570	Dihydromyricetin	Flavonol	9	9	9	906000	550000	1810000	3.2585	120963	16.8842	up
Hov1212	(-)-Sinigrin hydrate	Others	9	16000	9	10800	21000	16500	1.7891	3.01536	1.59233	up
Hov1064	Hesperetin 7-rutinoside (Hesperidin)	Flavanone	17000	34800	21800	106000	87600	87500	1.0993	3.81929	1.93331	up
Hov1072	2-(Formylamino)benzoic acid	Organic acids	10400000	8440000	15600000	919000	5050000	2340000	1.11546	0.24126	-2.05134	down
Hov811	Quercetin 4'-O-glucoside (Spiraeoside)	Flavonol	18900	49300	14700	199000	92000	160000	1.21588	5.44029	2.44368	up
Hov1078	D-Sedoheptuiose 7-phosphate	Carbohydrates	9	86000	9	164000	111000	92500	2.06841	4.27236	2.09503	up
Hov1186	Uridine 5'-monophosphate	Nucleotide and its derivates	3740000	6060000	3450000	589000	853000	618000	1.28473	0.155472	-2.68528	down
Hov580	Cyclic AMP	Nucleotide and its derivates	9	9	9	3930000	1630000	9	2.32911	205926	17.6518	up
Hov812	Quercetin 3-O-glucoside (Isotrifoliin)	Flavonol	25300	49200	29400	200000	127000	181000	1.19015	4.88932	2.28963	up
Hov105	Vitexin 2''-O-beta-L-rhamnoside	Flavone C-glycosides	1290000	1010000	1380000	256000	319000	224000	1.17541	0.21712	-2.20344	down
Hov1084	Calycosin	Isoflavone	9	9	5860	8640	6320	10900	1.77608	4.39946	2.13733	up
Hov1086	Glycitein	Isoflavone	9	3820	5710	9970	6000	11500	1.16553	2.87976	1.52595	up
Hov799	Afzelechin (3,5,7,4'-Tetrahydroxyflavan)	Flavanone	827000	733000	1010000	122000	85200	168000	1.32266	0.145992	-2.77604	down
Hov1093	Tricetin	Flavone	9	9	9	17400	6100	8690	2.52821	1192.22	10.2194	up
Hov585	1,4-dihydro-1-Methyl-4-oxo-3-pyridinecarboxamide	Pyridine derivatives	10100000	14700000	13600000	3110000	3230000	4020000	1.0821	0.269792	-1.89008	down
Hov366	N6-Succinyl Adenosine	Nucleotide and its derivates	2500000	4860000	1740000	8880000	7380000	16500000	1.01856	3.6	1.848	up
Hov1143	Aminophylline	Alkaloids	9	9	9	29800	27600	30500	2.72486	3255.56	11.6687	up
Hov599	6-Methoxy-7,8-DihydroxyCoumarin	Coumarins	128000	126000	144000	420000	400000	486000	1.04001	3.28141	1.71431	up
Hov1104	Eudesmic acid (3,4,5-trimethoxybenzoic acid)	Benzoic acid derivatives	35500	18700	27600	9	9	9	2.70563	0.000330073	-11.5649	down
Hov214	Cytidine	Nucleotide and its derivates	20900000	46800000	73900000	11700000	15500000	6730000	1.02357	0.239619	-2.06119	down
Hov720	Deoxyadenosine	Nucleotide and its derivates	46300000	45000000	61000000	8950000	23200000	14300000	1.02194	0.30499	-1.71317	down
