# Supplementary material for: Time-Course Comparative Metabolite Profiling under Osmotic Stress in Tolerant and Sensitive Tibetan Hulless Barley
Source: Biomed Res Int. 2018 Dec 23;2018:9415409. doi: 10.1155/2018/9415409 (PMC6323448; doi:10.1155/2018/9415409)
Supplement: Supplementary Materials — Supplementary Table S1: list of metabolites composing the core metabolome responsive to osmotic stress in hulless barley. Supplementary Table S2: list of the differentially changed metabolites between XL and D at 1 h. Supplementary Table S3: list of the differentially changed metabolites between XL and D at 4 h. Supplementary Table S4: list of the differentially changed metabolites between XL and D at 8 h. Supplementary Table S5: list of the differentially changed metabolites between XL and D at 24 h. Supplementary Table S6: list of the differentially changed metabolites between XL and D at 48 h. Supplementary Table S7: shared and specific differentially changed metabolites between XL and D at the different time points. Supplementary Figure S1: the top 20 differentially changed metabolites during the different time points in D. Supplementary Figure S2: the top 20 differentially changed metabolites during the different time points in XL. Supplementary Figure S3: KEGG enrichment of differentially changed metabolites at 1 h between XL and D. Supplementary Figure S4: KEGG enrichment of differentially changed metabolites at 4 h between XL and D. Supplementary Figure S5: KEGG enrichment of differentially changed metabolites at 8 h between XL and D. Supplementary Figure S6: KEGG enrichment of differentially changed metabolites at 24 h between XL and D. Supplementary Figure S7: KEGG enrichment of differentially changed metabolites at 48 h between XL and D. [file 9415409.f1.zip › 9415409.f5.xlsx]

## Sheet: Feuil1
Index	Compounds	Class	DS_24h_1	DS_24h_2	DS_24h_3	XLS_24h_1	XLS_24h_2	XLS_24h_3	VIP	Fold_Change	LogFC	type
Hov191	N-Caffeoyl agmatine	Phenolamides	1190000	802000	800000	381000	482000	281000	1.20382	0.409742	-1.28721	down
Hov236	N-sinapoyl hydroxycoumarin	Coumarins	13700000	10400000	5300000	3930000	2890000	2260000	1.31557	0.308844	-1.69505	down
Hov195	O-Sinapoyl quinic acid	Quinate and its derivatives	262000	346000	270000	125000	151000	141000	1.12398	0.474943	-1.07417	down
Hov474	Selgin 5-O-hexoside	Flavone	505000	2530000	629000	1450000	2950000	4700000	1.13162	2.48362	1.31245	up
Hov741	Chrysoeriol 5-O-hexoside	Flavone	8290000	20800000	13300000	27300000	26900000	43000000	1.12983	2.29299	1.19723	up
Hov129	Ayanin	Flavonol	190000	417000	475000	933000	677000	1100000	1.19897	2.50462	1.32459	up
Hov755	Tricin 4'-O-(¦Â-guaiacylglyceryl) ether-O-rutinoside	Flavonolignan	107000	72500	113000	20600	19000	28400	1.59009	0.232479	-2.10483	down
Hov823	Velutin	Flavone	88900	176000	339000	289000	403000	688000	1.05731	2.28515	1.19229	up
Hov825	E-3,4,5'-Trihydroxy-3'-glucopyranosylstilbene	Others	25600	14300	10500	9920	7730	4750	1.02579	0.444444	-1.16993	down
Hov230	Isorhamnetin O-hexoside	Flavonol	1060000	1480000	1460000	2690000	2570000	3560000	1.14733	2.205	1.14078	up
Hov223	Benzamide	Others	6990000	7660000	5890000	22700000	14300000	15800000	1.25179	2.57059	1.3621	up
Hov406	N-Acetyl tryptamine	Phenolamides	1250000	1320000	1280000	6690000	3640000	7720000	1.59256	4.68831	2.22907	up
Hov166	MAG (18:4) isomer1	Lipids_Glycerolipids	334000	986000	603000	433000	266000	140000	1.003	0.436297	-1.19662	down
Hov478	PC 16:1/14:1	Lipids_Glycerophospholipids	777000	524000	754000	425000	211000	253000	1.16672	0.432603	-1.20888	down
Hov691	O-Feruloyl coumarin	Coumarins	180000	11800000	206000	8310000	9440000	13700000	1.79658	2.58083	1.36784	up
Hov51	Tricin	Flavone	32900000	16100000	42800000	3380000	6520000	13700000	1.45837	0.257081	-1.95971	down
Hov117	Luteolin O-feruloylhexoside	Flavone C-glycosides	194000	165000	111000	386000	392000	347000	1.22704	2.39362	1.25919	up
Hov377	O-Feruloyl 4-hydroxylcoumarin	Coumarins	5880000	4390000	4010000	1990000	2180000	1750000	1.21694	0.414566	-1.27033	down
Hov482	Aspartic acid di-O-glucoside	Amino acid derivatives	156000	303000	180000	610000	1100000	311000	1.23345	3.16275	1.66118	up
Hov391	Spermidine	Phenolamides	6650000	8660000	10100000	2500000	2810000	2660000	1.41324	0.313656	-1.67274	down
Hov704	N'-p-Coumaroyl agmatine	Phenolamides	9580000	7570000	10200000	2230000	1700000	5490000	1.35163	0.344424	-1.53774	down
Hov692	N-Feruloyl agmatine	Phenolamides	16500000	22000000	23300000	2750000	5730000	12300000	1.35485	0.336246	-1.57241	down
Hov52	N-(4'-O-glycosyl)-p-coumaroyl agmatine	Phenolamides	27200000	26900000	38700000	5220000	12600000	9330000	1.44084	0.292565	-1.77317	down
Hov133	N-(4'-O-glycosyl)-feruloyl agmatine	Phenolamides	16000000	32800000	32400000	5550000	7480000	12900000	1.33095	0.319335	-1.64686	down
Hov693	N-p-Coumaroyl agmatine	Phenolamides	12600000	10800000	12700000	2990000	2710000	7040000	1.34035	0.352909	-1.50263	down
Hov171	Nicotinic acid adenine dinucleotide	Nucleotide and its derivates	3010000	3180000	2300000	11300	149000	603000	2.20151	0.0899058	-3.47544	down
Hov264	Syringetin 5-O-hexoside	Flavone	503000	1250000	809000	1850000	1340000	2210000	1.05986	2.10773	1.07569	up
Hov115	Luteolin O-hexoside O-feruloylpentoside	Flavone	435000	372000	499000	227000	103000	228000	1.18168	0.427259	-1.22682	down
Hov232	Isorhamnetin 5-O-hexoside	Flavonol	997000	1270000	1130000	2570000	2560000	3790000	1.27274	2.62585	1.39278	up
Hov268	Syringetin 7-O-hexoside	Flavone	474000	1530000	935000	2580000	1640000	2650000	1.14053	2.33753	1.22498	up
Hov39	Apigenin 6-C-hexosyl-8-C-hexosyl-O-hexoside	Flavone C-glycosides	5890000	5120000	8520000	2310000	2380000	2300000	1.31203	0.357911	-1.48233	down
Hov486	C-hexosyl-isorhamnetin O-hexoside	Flavone C-glycosides	1240000	1330000	230000	9	9	9	4.47296	9.64286e-06	-16.6621	down
Hov71	C-hexosyl-luteolin O-hexoside	Flavone C-glycosides	183000	132000	56000	37000	66300	48100	1.01305	0.408086	-1.29305	down
Hov270	6-C-hexosyl-luteolin O-hexoside	Flavone C-glycosides	66400000	56600000	21400000	12000000	22800000	24000000	1.01766	0.407202	-1.29618	down
Hov225	C-hexosyl-apigenin O-feruloylhexoside-O-hexoside	Flavone C-glycosides	877000	1120000	1490000	329000	485000	707000	1.13814	0.436192	-1.19697	down
Hov135	6-C-hexosyl luteolin O-pentoside	Flavone C-glycosides	217000	161000	222000	9	9	9	4.22286	4.5e-05	-14.4397	down
Hov763	C-hexosyl-apigenin O-pentoside	Flavone C-glycosides	5320000	5050000	8560000	9	9	9	4.89432	1.42631e-06	-19.4193	down
Hov385	di-C,C-hexosyl-apigenin	Flavone C-glycosides	13800000	11400000	13100000	9	9	9	5.02564	7.04961e-07	-20.436	down
Hov444	8-C-hexosyl-chrysoeriol O-feruloylhexoside	Flavone C-glycosides	8930000	8330000	11000000	1250000	3850000	6780000	1.18244	0.420382	-1.25023	down
Hov45	6-C-hexosyl-chrysoeriol O-feruloylhexoside	Flavone C-glycosides	3800000	3160000	2100000	824000	1730000	1840000	1.01296	0.484989	-1.04398	down
Hov130	Tricin 7-O-feruloylhexoside	Flavone	9	9	61900	85700	60200	81000	2.76769	3.66452	1.87363	up
Hov756	Tricin O-sinapoylhexoside	Flavone	3790000	2210000	8560000	366000	785000	3950000	1.27693	0.350343	-1.51316	down
Hov448	Tricin 7-O-¦Â-guaiacylglycerol	Flavonolignan	45800	41800	126000	9	9	9	3.96713	0.000126404	-12.9497	down
Hov677	Tricin O-phenylformic acid	Flavone	834000	557000	1130000	176000	241000	520000	1.2422	0.371678	-1.42788	down
Hov721	Tricin 4'-O-syringyl alcohol	Flavonolignan	2220000	1280000	2820000	273000	572000	1240000	1.31996	0.329905	-1.59988	down
Hov53	Tricin 4'-O-¦Â-guaiacylglycerol	Flavonolignan	35300000	16700000	48200000	1160000	4310000	8700000	1.81359	0.141417	-2.82197	down
Hov37	N-Feruloyl tryptamine	Tryptamine derivatives	381000	1350000	452000	1260000	2000000	2180000	1.21307	2.49198	1.31729	up
Hov768	LysoPE 18:2 (2n isomer)	Lipids_Glycerophospholipids	6760000	9000000	21400000	3800000	6350000	3960000	1.08161	0.379709	-1.39703	down
Hov25	LysoPE 18:0 (2n isomer)	Lipids_Glycerophospholipids	52500	40400	178000	12000	20300	5140	1.69285	0.138206	-2.85511	down
Hov291	iP7G	Nucleotide and its derivates	350000	589000	145000	938000	889000	1220000	1.31247	2.81089	1.49102	up
Hov178	O-Feruloyl 3-hydroxylcoumarin	Coumarins	2430000	2140000	3660000	865000	1040000	1380000	1.21751	0.399149	-1.325	down
Hov438	Tricin 4'-O-syringic acid	Flavonolignan	775000	362000	1350000	41800	154000	209000	1.67531	0.162766	-2.61913	down
Hov180	MAG (18:4) isomer3	Lipids_Glycerolipids	1190000	2040000	1010000	7720000	2010000	4130000	1.22382	3.26887	1.70879	up
Hov698	MAG (18:3) isomer3	Lipids_Glycerolipids	1330000	2050000	3400000	896000	1320000	590000	1.08708	0.413864	-1.27277	down
Hov151	MGMG (18:2) isomer1	Lipids_Glycerolipids	16800000	22400000	52000000	9150000	20300000	7080000	1.05585	0.400548	-1.31995	down
Hov757	LysoPC 10:0	Lipids_Glycerophospholipids	69500	25600	9	38600	9	9	1.2985	0.406039	-1.30031	down
Hov297	LysoPC 15:1	Lipids_Glycerophospholipids	540000	631000	918000	369000	256000	277000	1.16072	0.431786	-1.21161	down
Hov598	PC 19:2/16:0	Lipids_Glycerophospholipids	211000	174000	283000	104000	107000	28900	1.27278	0.359132	-1.47741	down
Hov1213	N-Acetylmethionine	Amino acid derivatives	328000	479000	550000	107000	153000	292000	1.19335	0.40678	-1.29768	down
Hov829	Acetyl tryptophan	Amino acid derivatives	1440000	726000	1150000	506000	382000	461000	1.18032	0.406815	-1.29755	down
Hov831	3,4-Dimethoxycinnamic acid	Hydroxycinnamoyl derivatives	23800	36900	56900	20600	15800	15600	1.05913	0.442177	-1.1773	down
Hov836	Anthranilate O-hexosyl-O-hexoside	Benzoic acid derivatives	17600	26600	24800	9	15000	12900	1.629	0.404478	-1.30587	down
Hov1153	Argininosuccinate	Organic acids	15000	20400	17200	8100	4760	8630	1.22611	0.408555	-1.2914	down
Hov1126	Protocatechuic acid O-glucoside	Catechin derivatives	18900000	12700000	12500000	8480000	5610000	4490000	1.17984	0.421315	-1.24703	down
Hov853	L-Glutamic acid O-glucoside	Amino acid derivatives	11500	8310	11300	2710	5460	5850	1.12509	0.450659	-1.14989	down
Hov855	Kynurenic acid O-hexside	Organic acids	269000	252000	194000	894000	801000	751000	1.47492	3.42098	1.77441	up
Hov788	2,5-dihydroxy benzoic acid O-hexside	Benzoic acid derivatives	10600000	9370000	9170000	5340000	4290000	3970000	1.15158	0.466712	-1.09939	down
Hov858	Gallic acid O-Hexoside	Benzoic acid derivatives	7930000	6060000	4390000	4850000	2630000	1200000	1.04557	0.472252	-1.08237	down
Hov859	Caftaric acid	Hydroxycinnamoyl derivatives	623000	775000	938000	123000	241000	410000	1.3564	0.331336	-1.59363	down
Hov860	Disinapoyl hexoside	Hydroxycinnamoyl derivatives	524000	409000	848000	137000	201000	210000	1.37286	0.307692	-1.70044	down
Hov1297	2'-Deoxyinosine	Nucleotide and its derivates	9	9	9	13500	9	9	1.384	500.667	8.96771	up
Hov1141	Hesperetin O-malonylhexoside	Flavanone	9	9	9	53300	59700	94700	3.98537	7692.59	12.9093	up
Hov1275	Acetyl-eriodictyol O-hexoside	Flavone	122000	116000	146000	14700	25800	37200	1.67744	0.202344	-2.30512	down
Hov869	Luteolin O-hexosyl-O-gluconic acid	Flavone	1720	2270	3390	9	9	9	3.14948	0.00365854	-8.09452	down
Hov873	Chrysoeriol O-hexosyl-O-hexosyl-O-Glucuronic acid	Flavone	678000	546000	403000	112000	232000	240000	1.28194	0.358943	-1.47817	down
Hov881	Chrysoeriol O-homovanillic acid	Flavone	23800	32800	19800	9	9	9	3.75709	0.000353403	-11.4664	down
Hov882	Eriodictyol C-hexoside	Flavone C-glycosides	9	15400	16900	9510	21100	36300	1.49439	2.07094	1.05029	up
Hov1340	Tricin O-malonyl rhamnoside	Flavone	82500	46900	108000	4600	8740	23500	1.79537	0.155181	-2.68797	down
Hov1159	Tricin 4'-O-(syringyl alcohol) ether 5-O-hexoside	Flavonolignan	289000	214000	459000	112000	141000	117000	1.20599	0.384615	-1.37851	down
Hov1277	Tricin O-eudesmic acid	Flavone	175000	172000	265000	30900	58300	114000	1.35072	0.332026	-1.59063	down
Hov896	O-p-Coumaroyl quinic acid O-rutinoside derivative	Quinate and its derivatives	143000	102000	134000	51500	51400	53100	1.23585	0.411609	-1.28065	down
Hov901	Esculetin O-quinacyl esculetin O-quinic acid	Coumarins	7360000	7970000	2680000	2690000	1760000	2900000	1.02276	0.408107	-1.29298	down
Hov908	Glutathione oxidized	Amino acid derivatives	4250000	2450000	5140000	320000	883000	762000	1.73903	0.165963	-2.59107	down
Hov1308	N-p-Coumaroyl hydroxydehydroagmatine	Phenolamides	667000	3170000	546000	6660000	6980000	9390000	1.75659	5.25439	2.39352	up
Hov1278	L-Cysteinyl-L-leucylglycyl-L-alanylglycylglycyl-L-alanylglycyl-L-cysteine	Amino acid derivatives	32800	17200	31300	2870	1680	7700	1.82626	0.150677	-2.73047	down
Hov1222	Guanosine 5'-monophosphate	Nucleotide and its derivates	19700	21300	43000	8600	10400	6670	1.35062	0.305595	-1.71031	down
Hov1197	4-Hydroxy-7-methoxycoumarin-beta-rhamnoside	Coumarins	23300	21300	18000	6640	5700	12400	1.2522	0.395208	-1.33932	down
Hov713	Adenosine O-ribose	Nucleotide and its derivates	5370000	5490000	4750000	12300000	7300000	16100000	1.08445	2.287	1.19345	up
Hov205	(+)-Jasmonic acid (JA)	Phytohormones	58100	61400	101000	10400	11800	26000	1.61263	0.218594	-2.19367	down
Hov184	LysoPC 18:0	Lipids_Glycerophospholipids	3350000	3160000	7880000	2840000	2540000	514000	1.08638	0.40959	-1.28775	down
Hov732	L-Proline	Amino acids	4250000	4210000	1950000	15500000	8080000	4160000	1.0665	2.66475	1.414	up
Hov918	L-Glutamic acid	Amino acids	1860000	2620000	2090000	560000	982000	1180000	1.19887	0.414307	-1.27123	down
Hov666	Methyl indole-3-acetate	Phytohormones	96700	87200	323000	38800	18900	36800	1.53632	0.186427	-2.42331	down
Hov1202	L-Cysteine	Amino acids	844000	1080000	446000	2830000	1410000	2170000	1.23564	2.70464	1.43544	up
Hov468	Kaempferol	Flavonol	47000	20400	34600	10300	11800	15000	1.23214	0.363725	-1.45908	down
Hov506	Methyl jasmonate	Phytohormones	9	29700	43600	9	9	9	2.64285	0.000368304	-11.4068	down
Hov640	Azelaic acid	Organic acids	245000	259000	116000	864000	632000	479000	1.37703	3.18548	1.67151	up
Hov509	N-Acetyl-l-leucine	Amino acid derivatives	317000	300000	279000	730000	516000	572000	1.08877	2.02902	1.02078	up
Hov397	Thymidine	Nucleotide and its derivates	2050000	2120000	1390000	4770000	3360000	3330000	1.07933	2.06115	1.04345	up
Hov945	2-Methylsuccinic acid	Organic acids	4540000	3290000	5090000	1250000	1970000	1730000	1.26376	0.383127	-1.38411	down
Hov306	Cinnamic acid	Hydroxycinnamoyl derivatives	64800	83900	67100	395000	184000	145000	1.32125	3.35496	1.74629	up
Hov1173	Methyl gallate	Benzoic acid derivatives	15300	15700	17800	12400	9	11000	1.57234	0.479693	-1.05982	down
Hov521	Chrysoeriol	Flavone	830000	407000	1120000	106000	157000	391000	1.40638	0.277471	-1.84959	down
Hov790	Chlorogenic acid (3-O-Caffeoylquinic acid)	Quinate and its derivatives	68800	79400	70700	26100	9	64200	1.7875	0.412558	-1.27733	down
Hov220	Vanillin	Benzoic acid derivatives	1340000	1300000	1150000	3370000	3020000	3220000	1.28446	2.53562	1.34234	up
Hov1289	3,4,5-Trimethoxycinnamic acid	Hydroxycinnamoyl derivatives	9720	9770	16700	6390	5820	4880	1.06779	0.47223	-1.08244	down
Hov971	Gluconic acid	Carbohydrates	384000	350000	457000	189000	181000	209000	1.11693	0.486146	-1.04054	down
Hov976	Glutathione reduced form	Amino acid derivatives	69700	43700	76600	23700	25900	18900	1.29017	0.360526	-1.47182	down
Hov97	6-hydroxynicotinic acid	Vitamins	427000	400000	294000	1200000	842000	737000	1.21895	2.47904	1.30978	up
Hov701	Deoxyguanosine	Nucleotide and its derivates	2180000	2800000	2250000	8230000	3670000	4290000	1.04489	2.23928	1.16304	up
Hov986	Xanthosine	Nucleotide and its derivates	2540000	2230000	3370000	967000	1100000	1450000	1.18074	0.432064	-1.21068	down
Hov60	Delphinidin 3-O-glucoside (Mirtillin)	Anthocyanins	9	170000	71000	329000	382000	315000	2.06742	4.2571	2.08987	up
Hov538	L-Methionine methyl ester	Amino acid derivatives	311000	575000	592000	94300	192000	222000	1.28474	0.343911	-1.53989	down
Hov996	Formononetin (4'-O-methyldaidzein)	Isoflavone	24100	30100	25800	5510	9480	13300	1.32679	0.353625	-1.49971	down
Hov805	Hesperetin 5-O-glucoside	Flavanone	43300	53700	82200	112000	155000	262000	1.27018	2.95201	1.5617	up
Hov1012	Arctiin	Others	110000	86000	65400	43300	24600	28900	1.27566	0.370314	-1.43318	down
Hov1013	Coniferyl alcohol	Hydroxycinnamoyl derivatives	16300	26700	37700	9	6800	10400	1.88568	0.213247	-2.22941	down
Hov1015	Pinoresinol	Hydroxycinnamoyl derivatives	24600	14900	23000	6130	10900	7490	1.22702	0.39232	-1.3499	down
Hov330	Indole 3-acetic acid (IAA)	Phytohormones	145000	181000	148000	1180000	193000	268000	1.01296	3.46203	1.79162	up
Hov806	Salicylic acid (SA)	Phytohormones	4360000	2890000	4260000	1200000	1440000	1000000	1.39955	0.316247	-1.66088	down
Hov542	sakuranetin	Flavone	565000	811000	1390000	1560000	1860000	2900000	1.10423	2.28489	1.19212	up
Hov421	D-Pantothenic dcid	Organic acids	79100	100000	148000	34300	44100	33100	1.32241	0.340874	-1.55269	down
Hov1018	3-Hydroxy-3-methyl butyric acid	Organic acids	1100000	1070000	1210000	4310000	3150000	1980000	1.25796	2.7929	1.48176	up
Hov1020	D-Erythronolactone	Organic acids	24600	33000	16400	102000	83100	114000	1.56144	4.04189	2.01503	up
Hov1021	2,5-dihydroxybenzoic acid (Gentisic acid)	Benzoic acid derivatives	12200	13600	14300	9	9	9	3.60839	0.000673317	-10.5364	down
Hov424	Dihydrozeatin (DZ)	Phytohormones	264000	114000	65800	9	9	9	4.11666	6.08382e-05	-14.0047	down
Hov1328	Gibberellin A4 (GA4)	Phytohormones	1810	2080	9	9	9	9	2.10827	0.00692485	-7.174	down
Hov1032	N-[(-)-Jasmonoyl]-(L)-Isoleucine (JA-L-Ile)	Phytohormones	1550000	1570000	2550000	564000	781000	850000	1.23863	0.387125	-1.36913	down
Hov1034	(S)-(-)-2-Hydroxyisocaproic acid	Organic acids	56100	61200	44700	161000	97100	92300	1.08397	2.16296	1.11301	up
Hov1140	Citraconic acid	Organic acids	253000	372000	382000	148000	121000	232000	1.04132	0.497517	-1.00718	down
Hov1040	L-Gulonic-¦Ã-lactone	Carbohydrates	8570	8040	6900	31700	17400	25900	1.38339	3.19013	1.67362	up
Hov1041	D-Arabitol	Alcohols and polyols	13600	11000	13800	8720	4330	9	1.68225	0.340078	-1.55606	down
Hov1223	Guanosine monophosphate	Nucleotide and its derivates	33600	23700	74100	15600	22100	10400	1.12646	0.366058	-1.44986	down
Hov656	Hesperetin	Flavanone	150000	216000	206000	273000	304000	1000000	1.01787	2.75699	1.4631	up
Hov760	Phenethylamine	Others	5790000	5230000	4360000	17800000	8810000	12900000	1.2061	2.56892	1.36116	up
Hov776	N-Methyltryptamine	Tryptamine derivatives	15000000	71100000	19500000	88900000	46800000	176000000	1.21277	2.9517	1.56155	up
Hov1221	Vitamin D3	Vitamins	4080	9140	12000	9	9	9	3.46125	0.00107058	-9.86739	down
Hov1057	2,3-Dihydroxybenzoic acid	Organic acids	76400	53400	49900	38300	9	9	2.80886	0.213233	-2.2295	down
Hov562	Indole-3-carboxaldehyde	Indole derivatives	12300000	8550000	6280000	23400000	14700000	21500000	1.10904	2.19683	1.13542	up
Hov349	S-(5'-Adenosyl)-L-methionine	Amino acid derivatives	16000000	13400000	20800000	6740000	7220000	7530000	1.19325	0.428088	-1.22402	down
Hov809	Flavin adenine dinucleotide (FAD)	Nucleotide and its derivates	457000	321000	654000	73400	97000	78900	1.72214	0.174092	-2.52208	down
Hov566	N-Acetyl-5-hydroxytryptamine	Tryptamine derivatives	2010000	2350000	3000000	1260000	1300000	1070000	1.07923	0.493207	-1.01974	down
Hov1064	Hesperetin 7-rutinoside (Hesperidin)	Flavanone	21500	31600	40600	44600	61600	137000	1.07689	2.59552	1.37602	up
Hov1070	Uridine 5¡¯-diphosphate	Nucleotide and its derivates	29600	16200	24900	7700	6400	5330	1.4705	0.274823	-1.86342	down
Hov578	GIBBERELLIN A9	Phytohormones	40800	9	9	9	9	9	1.49385	0.000661473	-10.562	down
Hov811	Quercetin 4'-O-glucoside (Spiraeoside)	Flavonol	32100	49600	60700	69600	126000	187000	1.16524	2.6868	1.42589	up
Hov1077	D-Glucose 6-phosphate	Carbohydrates	815000	712000	915000	239000	335000	297000	1.3404	0.356675	-1.48732	down
Hov1186	Uridine 5'-monophosphate	Nucleotide and its derivates	991000	1450000	1810000	605000	553000	322000	1.30143	0.348153	-1.52221	down
Hov1189	N-acetylglycine	Amino acid derivatives	14400	7820	9420	23600	21100	19800	1.08648	2.03856	1.02755	up
Hov1081	trans,trans-Muconic acid	Organic acids	873000	798000	715000	1190000	3010000	1980000	1.16404	2.59011	1.37301	up
Hov812	Quercetin 3-O-glucoside (Isotrifoliin)	Flavonol	32500	48300	67200	86100	112000	212000	1.20056	2.77095	1.47038	up
Hov105	Vitexin 2''-O-beta-L-rhamnoside	Flavone C-glycosides	3140000	2520000	4250000	193000	139000	294000	2.21408	0.0631685	-3.98465	down
Hov799	Afzelechin (3,5,7,4'-Tetrahydroxyflavan)	Flavanone	387000	218000	317000	157000	107000	64200	1.28681	0.355965	-1.49019	down
Hov1093	Tricetin	Flavone	9	9	9	9	9	21900	1.42515	811.778	9.66494	up
Hov1094	p-Coumaryl alcohol	Hydroxycinnamoyl derivatives	17600	11900	30500	9	11100	16800	1.53957	0.46515	-1.10423	down
Hov1167	D-Fructose 6-phosphate	Carbohydrates	244000	201000	264000	64800	87700	77100	1.40351	0.323836	-1.62666	down
Hov586	8-Hydroxy-2-deoxyguanosine	Nucleotide and its derivates	116000	130000	56000	417000	230000	294000	1.35728	3.11589	1.63965	up
Hov1104	Eudesmic acid (3,4,5-trimethoxybenzoic acid)	Benzoic acid derivatives	13800	11900	21800	9	9	9	3.64145	0.000568421	-10.7808	down
Hov1108	p-Coumaraldehyde	Hydroxycinnamoyl derivatives	7790	6000	9670	9	4320	6810	1.48211	0.474808	-1.07458	down
Hov1109	Homoeriodictyol	Flavanone	17100	28600	19400	50100	59100	138000	1.39685	3.79724	1.92495	up
Hov1110	Isosakuranetin (4'-Methylnaringenin)	Flavanone	3160	3750	5520	9240	8660	14100	1.23173	2.57442	1.36425	up
Hov374	Pantetheine	Vitamins	5390000	4030000	4480000	941000	1450000	2140000	1.38423	0.325971	-1.61718	down
Hov1114	Myricetin 3-O-galactoside	Flavonol	21300	15200	55400	9	11600	7310	1.8584	0.205865	-2.28023	down
Hov376	2-(dimethylamino)guanosine	Nucleotide and its derivates	1940000	2540000	2290000	7440000	4570000	4720000	1.20979	2.4712	1.30521	up
