# Supplementary material for: Time-Course Comparative Metabolite Profiling under Osmotic Stress in Tolerant and Sensitive Tibetan Hulless Barley
Source: Biomed Res Int. 2018 Dec 23;2018:9415409. doi: 10.1155/2018/9415409 (PMC6323448; doi:10.1155/2018/9415409)
Supplement: Supplementary Materials — Supplementary Table S1: list of metabolites composing the core metabolome responsive to osmotic stress in hulless barley. Supplementary Table S2: list of the differentially changed metabolites between XL and D at 1 h. Supplementary Table S3: list of the differentially changed metabolites between XL and D at 4 h. Supplementary Table S4: list of the differentially changed metabolites between XL and D at 8 h. Supplementary Table S5: list of the differentially changed metabolites between XL and D at 24 h. Supplementary Table S6: list of the differentially changed metabolites between XL and D at 48 h. Supplementary Table S7: shared and specific differentially changed metabolites between XL and D at the different time points. Supplementary Figure S1: the top 20 differentially changed metabolites during the different time points in D. Supplementary Figure S2: the top 20 differentially changed metabolites during the different time points in XL. Supplementary Figure S3: KEGG enrichment of differentially changed metabolites at 1 h between XL and D. Supplementary Figure S4: KEGG enrichment of differentially changed metabolites at 4 h between XL and D. Supplementary Figure S5: KEGG enrichment of differentially changed metabolites at 8 h between XL and D. Supplementary Figure S6: KEGG enrichment of differentially changed metabolites at 24 h between XL and D. Supplementary Figure S7: KEGG enrichment of differentially changed metabolites at 48 h between XL and D. [file 9415409.f1.zip › 9415409.f6.xlsx]

## Sheet: Feuil1
Index	Compounds	Class	DS_48h_1	DS_48h_2	DS_48h_3	XLS_48h_1	XLS_48h_2	XLS_48h_3	VIP	Fold_Change	LogFC	type
Hov191	N-Caffeoyl agmatine	Phenolamides	794000	1020000	958000	302000	396000	249000	1.31539	0.341631	-1.54949	down
Hov474	Selgin 5-O-hexoside	Flavone	434000	543000	381000	5200000	1770000	1610000	1.6022	6.31811	2.65949	up
Hov445	Cinnamoyl tyramine	Tryptamine derivatives	9	9	9	8180	9	9	1.29732	303.63	8.24617	up
Hov755	Tricin 4'-O-(¦Â-guaiacylglyceryl) ether-O-rutinoside	Flavonolignan	45200	55300	68400	49600	22100	11600	1.00427	0.493191	-1.01978	down
Hov823	Velutin	Flavone	61800	71400	66200	1340000	421000	323000	1.81482	10.4514	3.38562	up
Hov825	E-3,4,5'-Trihydroxy-3'-glucopyranosylstilbene	Others	8530	11700	15500	5530	7200	3360	1.05236	0.450322	-1.15097	down
Hov223	Benzamide	Others	4130000	5060000	3800000	13200000	11200000	12200000	1.30337	2.81755	1.49444	up
Hov406	N-Acetyl tryptamine	Phenolamides	2700000	2350000	1510000	8940000	4030000	5270000	1.19119	2.78049	1.47534	up
Hov691	O-Feruloyl coumarin	Coumarins	192000	185000	157000	15500000	13000000	11400000	2.67109	74.7191	6.22341	up
Hov745	MAG (18:1) isomer2	Lipids_Glycerolipids	2540000	1740000	4320000	6930000	8140000	17000000	1.367	3.72907	1.89882	up
Hov169	Aminopurine	Others	9	9	9	6640000	3240000	1500000	4.59733	421481	18.6851	up
Hov425	N-formylmethionine	Amino acid derivatives	4040000	5880000	5250000	13700000	6840000	15000000	1.05695	2.34278	1.22822	up
Hov704	N'-p-Coumaroyl agmatine	Phenolamides	11100000	9170000	8670000	1840000	4370000	3020000	1.35059	0.318936	-1.64866	down
Hov52	N-(4'-O-glycosyl)-p-coumaroyl agmatine	Phenolamides	20700000	32100000	30200000	13400000	10600000	6020000	1.24121	0.361687	-1.46719	down
Hov133	N-(4'-O-glycosyl)-feruloyl agmatine	Phenolamides	17300000	14700000	17900000	5430000	7170000	6820000	1.23906	0.389178	-1.3615	down
Hov693	N-p-Coumaroyl agmatine	Phenolamides	11700000	10300000	10000000	2340000	5230000	3720000	1.28948	0.352812	-1.50303	down
Hov144	Malvidin	Anthocyanins	1290000	1310000	943000	3960000	2590000	2260000	1.16117	2.48659	1.31417	up
Hov71	C-hexosyl-luteolin O-hexoside	Flavone C-glycosides	54600	55200	84900	75800	9	9	2.59802	0.389409	-1.36064	down
Hov135	6-C-hexosyl luteolin O-pentoside	Flavone C-glycosides	169000	128000	135000	9	9	9	4.00519	6.25e-05	-13.9658	down
Hov763	C-hexosyl-apigenin O-pentoside	Flavone C-glycosides	5770000	5030000	5800000	9	9	9	4.70097	1.62651e-06	-19.2298	down
Hov385	di-C,C-hexosyl-apigenin	Flavone C-glycosides	8100000	8420000	7410000	9	9	9	4.76501	1.12829e-06	-19.7574	down
Hov74	Luteolin C-hexosyl-O-rhamnoside O-hexoside	Flavone C-glycosides	154000	156000	217000	457000	823000	337000	1.247	3.06831	1.61744	up
Hov154	Quercetin 7-O-rutinoside	Flavonol	98800	69800	68600	166000	481000	92200	1.00983	3.11636	1.63986	up
Hov118	Tricin 5-O-hexosyl-O-hexoside	Flavone	499000	661000	830000	5610000	1200000	1600000	1.25804	4.22613	2.07934	up
Hov624	Tricin di-O-hexoside	Flavone	281000	202000	240000	1330000	415000	630000	1.22228	3.28492	1.71586	up
Hov175	Tricin O-malonylhexoside	Flavone	745000	576000	602000	1760000	1180000	1270000	1.09408	2.18929	1.13046	up
Hov130	Tricin 7-O-feruloylhexoside	Flavone	9	9	25300	305000	65700	104000	3.01541	18.7495	4.22878	up
Hov756	Tricin O-sinapoylhexoside	Flavone	2120000	2640000	3770000	1320000	918000	751000	1.25681	0.35041	-1.51288	down
Hov448	Tricin 7-O-¦Â-guaiacylglycerol	Flavonolignan	19400	12900	17400	9	9	9	3.52721	0.00054326	-10.8461	down
Hov749	D-erythro-Dihydrosphingosine	Others	1730000	725000	1030000	20500000	4540000	12800000	1.85193	10.858	3.44068	up
Hov722	N-Feruloyl serotonin	Tryptamine derivatives	1730000	2100000	3240000	19700000	8440000	20000000	1.71497	6.80905	2.76745	up
Hov441	N-Feruloyl tyramine	Phenolamides	4920000	2980000	5600000	3650000	45500000	12600000	1.01877	4.57407	2.19348	up
Hov37	N-Feruloyl tryptamine	Tryptamine derivatives	9	112000	150000	4760000	1970000	1150000	2.63696	30.0753	4.91051	up
Hov725	LysoPC 18:1 (2n isomer)	Lipids_Glycerophospholipids	1860000	1940000	2610000	6150000	9580000	6060000	1.38711	3.39938	1.76527	up
Hov82	LysoPE 18:1	Lipids_Glycerophospholipids	2890000	2780000	3330000	9770000	11300000	10900000	1.44616	3.55222	1.82872	up
Hov207	Tricin 4'-O-(¦Â-guaiacylglyceryl) ether 5-O-hexosyl-O-hexoside	Flavonolignan	361000	343000	228000	910000	495000	691000	1.07216	2.24893	1.16924	up
Hov182	4-Hydroxysphinganine	Lipids_Fatty acids	20400000	9390000	14500000	133000000	30600000	65100000	1.45627	5.16369	2.3684	up
Hov296	Phytocassane C	Terpenoids	2670000	1300000	1940000	18800000	4090000	8560000	1.45843	5.32149	2.41183	up
Hov26	LysoPC 19:0	Lipids_Glycerophospholipids	945000	769000	1110000	2800000	4700000	2590000	1.39774	3.57295	1.83711	up
Hov297	LysoPC 15:1	Lipids_Glycerophospholipids	762000	664000	777000	522000	241000	229000	1.10816	0.450295	-1.15106	down
Hov752	MAG (18:1) isomer1	Lipids_Glycerolipids	2860000	1980000	4760000	7490000	8260000	16900000	1.319	3.40104	1.76598	up
Hov6	MGMG (18:2) isomer2	Lipids_Glycerolipids	2380000	1210000	3900000	5530000	4970000	7080000	1.12221	2.34713	1.2309	up
Hov89	LysoPC 18:0 (2n isomer)	Lipids_Glycerophospholipids	8010000	10400000	12800000	15900000	36000000	25700000	1.11142	2.48638	1.31405	up
Hov1126	Protocatechuic acid O-glucoside	Catechin derivatives	14800000	19000000	23600000	2870000	9010000	4380000	1.40816	0.283275	-1.81972	down
Hov853	L-Glutamic acid O-glucoside	Amino acid derivatives	9	4150	9	4440	5650	2030	2.14979	2.90787	1.53996	up
Hov855	Kynurenic acid O-hexside	Organic acids	210000	238000	250000	896000	758000	495000	1.31409	3.0788	1.62237	up
Hov788	2,5-dihydroxy benzoic acid O-hexside	Benzoic acid derivatives	9880000	12500000	15500000	3610000	6070000	3310000	1.28957	0.342925	-1.54403	down
Hov858	Gallic acid O-Hexoside	Benzoic acid derivatives	5600000	8060000	7390000	1850000	4170000	2550000	1.16818	0.407126	-1.29645	down
Hov860	Disinapoyl hexoside	Hydroxycinnamoyl derivatives	627000	452000	708000	410000	268000	175000	1.02829	0.477336	-1.06692	down
Hov1141	Hesperetin O-malonylhexoside	Flavanone	9	9	9	217000	27600	47800	3.82315	10829.6	13.4027	up
Hov1275	Acetyl-eriodictyol O-hexoside	Flavone	49900	63500	77800	32100	25800	30500	1.08226	0.462343	-1.11296	down
Hov869	Luteolin O-hexosyl-O-gluconic acid	Flavone	4490	3110	3450	9	9	1710	2.33206	0.15638	-2.67687	down
Hov870	Apigenin O-hexosyl-O-rutinoside	Flavone	24000	15500	27000	72200	50800	47200	1.19588	2.5594	1.3558	up
Hov882	Eriodictyol C-hexoside	Flavone C-glycosides	9	10300	9	43600	21500	18200	2.68032	8.07327	3.01315	up
Hov892	5-O-p-coumaroyl quinic acid O-hexoside	Quinate and its derivatives	12200	9	9	9	15600	25200	1.25957	3.34007	1.73988	up
Hov894	3-O-p-coumaroyl quinic acid O-hexoside	Quinate and its derivatives	2.24	20900	9	11600	54900	61500	2.73059	6.12111	2.61379	up
Hov1148	5-O-p-coumaroyl shikimic acid O-hexoside	Quinate and its derivatives	13500	8420	9880	20700	22300	23400	1.07819	2.08805	1.06216	up
Hov897	3-O-p-Coumaroyl shikimic acid	Quinate and its derivatives	9	9	9	9	8080	3430	2.22789	426.63	8.73684	up
Hov901	Esculetin O-quinacyl esculetin O-quinic acid	Coumarins	6050000	5770000	6050000	2400000	1360000	701000	1.50458	0.249636	-2.0021	down
Hov907	LysoPE 18:1 (2n isomer)	Lipids_Glycerophospholipids	3080000	2960000	3530000	11800000	12500000	12200000	1.48886	3.814	1.93131	up
Hov1308	N-p-Coumaroyl hydroxydehydroagmatine	Phenolamides	590000	644000	372000	6910000	10300000	6320000	2.09591	14.6513	3.87296	up
Hov1197	4-Hydroxy-7-methoxycoumarin-beta-rhamnoside	Coumarins	20600	17800	20000	17500	5070	3880	1.11799	0.452911	-1.1427	down
Hov730	LysoPC 20:4	Lipids_Glycerophospholipids	719000	844000	1120000	1440000	2730000	1750000	1.05032	2.20649	1.14175	up
Hov912	Adenosine	Nucleotide and its derivates	22900	13700	23500	114000	69800	26000	1.1841	3.49085	1.80358	up
Hov152	LysoPC 16:0 (2n isomer)	Lipids_Glycerophospholipids	42900000	25300000	28800000	90700000	44000000	91300000	1.04957	2.3299	1.22027	up
Hov184	LysoPC 18:0	Lipids_Glycerophospholipids	2390000	797000	882000	7480000	1680000	5090000	1.20602	3.50209	1.80822	up
Hov185	LysoPC 20:1 (2n isomer)	Lipids_Glycerophospholipids	1490000	1320000	1540000	2860000	4660000	3850000	1.22038	2.61379	1.38614	up
Hov186	LysoPC 20:1	Lipids_Glycerophospholipids	1450000	1390000	1740000	2600000	5460000	4220000	1.18875	2.68122	1.42289	up
Hov106	Hesperetin 7-O-neohesperidoside (Neohesperidin)	Flavanone	120000	118000	159000	667000	262000	361000	1.27827	3.24937	1.70016	up
Hov405	Purine	Nucleotide and its derivates	2820000	2240000	3120000	9630000	6790000	5570000	1.22527	2.68826	1.42667	up
Hov493	Thymine	Nucleotide and its derivates	1530000	772000	496000	150000	345000	97200	1.49855	0.211651	-2.24024	down
Hov54	Quercetin 3-O-rutinoside (Rutin)	Flavonol	67600	58400	63900	128000	430000	99200	1.12593	3.46077	1.79109	up
Hov506	Methyl jasmonate	Phytohormones	9	27000	31600	9	9	20400	1.26048	0.348377	-1.52128	down
Hov509	N-Acetyl-l-leucine	Amino acid derivatives	326000	270000	299000	430000	865000	840000	1.08908	2.38547	1.25428	up
Hov947	Benzoylformic acid	Organic acids	25700	23300	14300	32800	70800	79700	1.19225	2.89573	1.53393	up
Hov306	Cinnamic acid	Hydroxycinnamoyl derivatives	104000	78000	90100	139000	255000	239000	1.09585	2.32635	1.21807	up
Hov311	Naringenin	Flavanone	126000	173000	110000	1380000	394000	391000	1.46237	5.2934	2.40419	up
Hov790	Chlorogenic acid (3-O-Caffeoylquinic acid)	Quinate and its derivatives	14600	11700	14100	76400	28500	32100	1.27149	3.39109	1.76175	up
Hov985	Homogentisic acid	Organic acids	733000	1330000	1320000	382000	650000	454000	1.06511	0.439255	-1.18687	down
Hov986	Xanthosine	Nucleotide and its derivates	2970000	3070000	3140000	2010000	1050000	1140000	1.10703	0.457516	-1.1281	down
Hov537	8-Hydroxyguanosine	Nucleotide and its derivates	1120000	1020000	871000	2060000	2520000	2770000	1.1948	2.44105	1.2875	up
Hov60	Delphinidin 3-O-glucoside (Mirtillin)	Anthocyanins	9	9	9	489000	334000	137000	4.13729	35555.6	15.1178	up
Hov538	L-Methionine methyl ester	Amino acid derivatives	216000	394000	642000	103000	180000	159000	1.13523	0.353035	-1.50212	down
Hov996	Formononetin (4'-O-methyldaidzein)	Isoflavone	23300	26900	36800	15800	12300	11100	1.09448	0.450575	-1.15016	down
Hov539	Kumatakenin	Flavonol	180000	238000	160000	2800000	1120000	829000	1.74961	8.21626	3.03848	up
Hov999	Baicalein (5,6,7-Trihydroxyflavone)	Flavone	9	9	3660	9	9	9	1.21156	0.00734095	-7.08982	down
Hov1001	Isorhamnetin 3-O-neohesperidoside	Flavonol	6510	5600	12700	75600	26100	23500	1.48261	5.04635	2.33524	up
Hov323	Acacetin	Flavone	37800	48800	47000	302000	145000	79900	1.31388	3.94386	1.97961	up
Hov1007	Eriodictyol	Flavanone	1220	5410	1440	23000	5770	5190	1.31807	4.20818	2.0732	up
Hov805	Hesperetin 5-O-glucoside	Flavanone	22500	24200	20500	337000	125000	128000	1.80357	8.77976	3.13418	up
Hov1009	7-O-Methyleriodictyol	Flavanone	9	9	9	6450	3250	2190	3.14166	440.37	8.78257	up
Hov816	Kaempferol 3-O-glucoside (Astragalin)	Flavonol	9	9	6840	20500	14300	13800	2.59193	7.08661	2.8251	up
Hov542	sakuranetin	Flavone	232000	232000	148000	2540000	1080000	774000	1.6882	7.17974	2.84393	up
Hov1021	2,5-dihydroxybenzoic acid (Gentisic acid)	Benzoic acid derivatives	9	16000	24900	9	10200	9	1.29422	0.249774	-2.00131	down
Hov717	serotonin	Tryptamine derivatives	12000000	18000000	14700000	41300000	19500000	43700000	1.04398	2.33781	1.22516	up
Hov1034	(S)-(-)-2-Hydroxyisocaproic acid	Organic acids	54100	63600	51400	93000	152000	140000	1.11207	2.27676	1.18698	up
Hov213	Trigonelline	Alkaloids	35500000	40400000	42700000	10000000	19500000	15900000	1.2337	0.382799	-1.38534	down
Hov656	Hesperetin	Flavanone	29200	37100	28000	1600000	261000	267000	2.0371	22.5663	4.4961	up
Hov760	Phenethylamine	Others	3920000	4570000	3390000	11300000	9040000	9410000	1.21881	2.50421	1.32435	up
Hov625	Enterodiol	Alcohols and polyols	9	9	9	185000	128000	108000	3.99458	15592.6	13.9286	up
Hov776	N-Methyltryptamine	Tryptamine derivatives	27500000	29800000	28700000	140000000	51500000	62400000	1.17669	2.95233	1.56185	up
Hov1057	2,3-Dihydroxybenzoic acid	Organic acids	51100	67000	93800	19300	36900	9	1.82975	0.265262	-1.91451	down
Hov570	Dihydromyricetin	Flavonol	9	9	504000	602000	526000	481000	2.94904	3.19235	1.67462	up
Hov1064	Hesperetin 7-rutinoside (Hesperidin)	Flavanone	17200	13900	17300	177000	54300	81100	1.63743	6.45455	2.69032	up
Hov353	Naringenin chalcone	Flavanone	94600	157000	130000	1350000	353000	371000	1.46057	5.43501	2.44228	up
Hov650	N-Acetylcysteine	Amino acid derivatives	471000	437000	439000	1190000	1360000	4710000	1.45231	5.38976	2.43022	up
Hov1270	Gibberellin A53	Phytohormones	12100	9	9	20900	21500	19600	2.54493	5.11636	2.35512	up
Hov578	GIBBERELLIN A9	Phytohormones	9	9	9	9	38300	34400	2.5477	2692.93	11.395	up
Hov811	Quercetin 4'-O-glucoside (Spiraeoside)	Flavonol	12600	17100	13900	295000	83300	102000	1.8723	11.0161	3.46154	up
Hov682	L-Palmitoylcarnitine	Others	6460	9	9	89300	4930	26800	2.66469	18.6832	4.22367	up
Hov1077	D-Glucose 6-phosphate	Carbohydrates	141000	151000	186000	354000	366000	262000	1.05494	2.05439	1.03871	up
Hov359	2'-Deoxyadenosine-5'-monophosphate	Nucleotide and its derivates	4650000	5390000	5790000	4220000	1480000	2010000	1.03171	0.48705	-1.03786	down
Hov580	Cyclic AMP	Nucleotide and its derivates	9	9	3480000	731000	238000	9	1.09556	0.278449	-1.84451	down
Hov360	1-methylguanidine	Nucleotide and its derivates	821000	737000	689000	123000	485000	365000	1.11428	0.433022	-1.20749	down
Hov812	Quercetin 3-O-glucoside (Isotrifoliin)	Flavonol	16900	18300	9740	331000	95900	114000	1.9172	12.036	3.58929	up
Hov105	Vitexin 2''-O-beta-L-rhamnoside	Flavone C-glycosides	3510000	2920000	3350000	238000	130000	113000	2.24164	0.049182	-4.34573	down
Hov361	Biochanin A	Isoflavone	27300	42500	35300	252000	110000	65200	1.32484	4.0647	2.02315	up
Hov1086	Glycitein	Isoflavone	2970	3720	9	22500	8360	4270	1.71266	5.24407	2.39069	up
Hov799	Afzelechin (3,5,7,4'-Tetrahydroxyflavan)	Flavanone	305000	275000	329000	129000	181000	87900	1.13514	0.437734	-1.19187	down
Hov1091	Prunetin	Isoflavone	177000	250000	182000	1160000	526000	334000	1.20893	3.31691	1.72984	up
Hov1093	Tricetin	Flavone	9	9	9	26600	3080	9800	3.36575	1462.22	10.5139	up
Hov366	N6-Succinyl Adenosine	Nucleotide and its derivates	9300000	10300000	8600000	12800000	21700000	24100000	1.00126	2.07801	1.05521	up
Hov1098	Rhamnetin (7-O-methxyl quercetin)	Flavonol	6790	9880	10300	63800	25200	15100	1.25785	3.85984	1.94854	up
Hov367	Sissotrin	Isoflavone	9	40200	19300	146000	78000	62700	1.94647	4.81776	2.26836	up
Hov1100	Syringetin	Flavonol	5690	4560	4220	49600	10600	7120	1.16809	4.65238	2.21797	up
Hov1104	Eudesmic acid (3,4,5-trimethoxybenzoic acid)	Benzoic acid derivatives	15900	16000	18700	9	9	9	3.5339	0.000533597	-10.872	down
Hov592	Butein	Flavanone	9	9	9	93400	9	9	1.51151	3459.93	11.7565	up
Hov1109	Homoeriodictyol	Flavanone	13700	13100	11800	159000	44700	54900	1.61951	6.69948	2.74405	up
Hov1110	Isosakuranetin (4'-Methylnaringenin)	Flavanone	1710	1580	1280	13200	5220	4690	1.51149	5.05689	2.33825	up
Hov593	Butin	Flavone	126000	163000	106000	1370000	360000	382000	1.45133	5.34684	2.41869	up
Hov374	Pantetheine	Vitamins	2720000	5230000	4650000	2210000	2550000	9	1.95643	0.377778	-1.40439	down
