# Supplementary material for: Time-Course Comparative Metabolite Profiling under Osmotic Stress in Tolerant and Sensitive Tibetan Hulless Barley
Source: Biomed Res Int. 2018 Dec 23;2018:9415409. doi: 10.1155/2018/9415409 (PMC6323448; doi:10.1155/2018/9415409)
Supplement: Supplementary Materials — Supplementary Table S1: list of metabolites composing the core metabolome responsive to osmotic stress in hulless barley. Supplementary Table S2: list of the differentially changed metabolites between XL and D at 1 h. Supplementary Table S3: list of the differentially changed metabolites between XL and D at 4 h. Supplementary Table S4: list of the differentially changed metabolites between XL and D at 8 h. Supplementary Table S5: list of the differentially changed metabolites between XL and D at 24 h. Supplementary Table S6: list of the differentially changed metabolites between XL and D at 48 h. Supplementary Table S7: shared and specific differentially changed metabolites between XL and D at the different time points. Supplementary Figure S1: the top 20 differentially changed metabolites during the different time points in D. Supplementary Figure S2: the top 20 differentially changed metabolites during the different time points in XL. Supplementary Figure S3: KEGG enrichment of differentially changed metabolites at 1 h between XL and D. Supplementary Figure S4: KEGG enrichment of differentially changed metabolites at 4 h between XL and D. Supplementary Figure S5: KEGG enrichment of differentially changed metabolites at 8 h between XL and D. Supplementary Figure S6: KEGG enrichment of differentially changed metabolites at 24 h between XL and D. Supplementary Figure S7: KEGG enrichment of differentially changed metabolites at 48 h between XL and D. [file 9415409.f1.zip › 9415409.f7.xlsx]

## Sheet: Feuil1
		Down-regulated							Up-regulated
Names	Total	Cod	Compounds	Class			Names	Total	Code	Compounds	Class
1h 24h 48h 4h 8h	10	Hov506	Methyl jasmonate	Phytohormones			1h 24h 48h 4h 8h	12	Hov805	Hesperetin 5-O-glucoside	Flavanone
		Hov763	C-hexosyl-apigenin O-pentoside	Flavone C-glycosides					Hov1141	Hesperetin O-malonylhexoside	Flavanone
		Hov1021	2,5-dihydroxybenzoic acid (Gentisic acid)	Benzoic acid derivatives					Hov37	N-Feruloyl tryptamine	Tryptamine derivatives
		Hov1197	4-Hydroxy-7-methoxycoumarin-beta-rhamnoside	Coumarins					Hov130	Tricin 7-O-feruloylhexoside	Flavone
		Hov1057	2,3-Dihydroxybenzoic acid	Organic acids					Hov1308	N-p-Coumaroyl hydroxydehydroagmatine	Phenolamides
		Hov799	Afzelechin (3,5,7,4'-Tetrahydroxyflavan)	Flavanone					Hov60	Delphinidin 3-O-glucoside (Mirtillin)	Anthocyanins
		Hov135	6-C-hexosyl luteolin O-pentoside	Flavone C-glycosides					Hov812	Quercetin 3-O-glucoside (Isotrifoliin)	Flavonol
		Hov869	Luteolin O-hexosyl-O-gluconic acid	Flavone					Hov406	N-Acetyl tryptamine	Phenolamides
		Hov1104	Eudesmic acid (3,4,5-trimethoxybenzoic acid)	Benzoic acid derivatives					Hov1093	Tricetin	Flavone
		Hov385	di-C,C-hexosyl-apigenin	Flavone C-glycosides					Hov474	Selgin 5-O-hexoside	Flavone
1h 24h 4h 8h	4	Hov1278	L-Cysteinyl-L-leucylglycyl-L-alanylglycylglycyl-L-alanylglycyl-L-cysteine	Amino acid derivatives					Hov691	O-Feruloyl coumarin	Coumarins
		Hov1328	Gibberellin A4 (GA4)	Phytohormones					Hov811	Quercetin 4'-O-glucoside (Spiraeoside)	Flavonol
		Hov806	Salicylic acid (SA)	Phytohormones			1h 24h 4h 8h	5	Hov741	Chrysoeriol 5-O-hexoside	Flavone
		Hov424	Dihydrozeatin (DZ)	Phytohormones					Hov268	Syringetin 7-O-hexoside	Flavone
1h 24h 48h 4h	2	Hov374	Pantetheine	Vitamins					Hov264	Syringetin 5-O-hexoside	Flavone
		Hov1126	Protocatechuic acid O-glucoside	Catechin derivatives					Hov230	Isorhamnetin O-hexoside	Flavonol
1h 24h 48h 8h	3	Hov448	Tricin 7-O-¦Â-guaiacylglycerol	Flavonolignan					Hov232	Isorhamnetin 5-O-hexoside	Flavonol
		Hov105	Vitexin 2''-O-beta-L-rhamnoside	Flavone C-glycosides			1h 48h 4h 8h	4	Hov118	Tricin 5-O-hexosyl-O-hexoside	Flavone
		Hov1275	Acetyl-eriodictyol O-hexoside	Flavone					Hov539	Kumatakenin	Flavonol
1h 24h 8h	1	Hov1186	Uridine 5'-monophosphate	Nucleotide and its derivates					Hov144	Malvidin	Anthocyanins
1h 24h 48h	7	Hov986	Xanthosine	Nucleotide and its derivates					Hov1086	Glycitein	Isoflavone
		Hov191	N-Caffeoyl agmatine	Phenolamides			1h 24h 48h 4h	3	Hov656	Hesperetin	Flavanone
		Hov858	Gallic acid O-Hexoside	Benzoic acid derivatives					Hov776	N-Methyltryptamine	Tryptamine derivatives
		Hov788	2,5-dihydroxy benzoic acid O-hexside	Benzoic acid derivatives					Hov542	sakuranetin	Flavone
		Hov901	Esculetin O-quinacyl esculetin O-quinic acid	Coumarins			24h 48h 4h 8h	3	Hov823	Velutin	Flavone
		Hov52	N-(4'-O-glycosyl)-p-coumaroyl agmatine	Phenolamides					Hov1064	Hesperetin 7-rutinoside (Hesperidin)	Flavanone
		Hov825	E-3,4,5'-Trihydroxy-3'-glucopyranosylstilbene	Others					Hov882	Eriodictyol C-hexoside	Flavone C-glycosides
24h 4h 8h	2	Hov486	C-hexosyl-isorhamnetin O-hexoside	Flavone C-glycosides			1h 4h 8h	3	Hov1132	1-O-p-Coumaroyl quinic acid	Quinate and its derivatives
		Hov1289	3,4,5-Trimethoxycinnamic acid	Hydroxycinnamoyl derivatives					Hov281	Tricin 7-O-hexosyl-O-hexoside	Flavone
48h 4h 8h	1	Hov999	Baicalein (5,6,7-Trihydroxyflavone)	Flavone					Hov1143	Aminophylline	Alkaloids
24h 48h 4h	1	Hov860	Disinapoyl hexoside	Hydroxycinnamoyl derivatives			1h 24h 4h	1	Hov129	Ayanin	Flavonol
24h 48h 8h	3	Hov538	L-Methionine methyl ester	Amino acid derivatives			1h 48h 4h	7	Hov367	Sissotrin	Isoflavone
		Hov297	LysoPC 15:1	Lipids_Glycerophospholipids					Hov593	Butin	Flavone
		Hov755	Tricin 4'-O-(¦Â-guaiacylglyceryl) ether-O-rutinoside	Flavonolignan					Hov353	Naringenin chalcone	Flavanone
1h 8h	3	Hov1348	Sebacate	Organic acids					Hov323	Acacetin	Flavone
		Hov317	1-Methyladenosine	Nucleotide and its derivates					Hov361	Biochanin A	Isoflavone
		Hov830	7-hydroxycoumarin-beta-rhamnoside	Coumarins					Hov184	LysoPC 18:0	Lipids_Glycerophospholipids
1h 24h	12	Hov809	Flavin adenine dinucleotide (FAD)	Nucleotide and its derivates					Hov311	Naringenin	Flavanone
		Hov377	O-Feruloyl 4-hydroxylcoumarin	Coumarins			1h 48h 8h	2	Hov625	Enterodiol	Alcohols and polyols
		Hov1153	Argininosuccinate	Organic acids					Hov1009	7-O-Methyleriodictyol	Flavanone
		Hov1013	Coniferyl alcohol	Hydroxycinnamoyl derivatives			1h 24h 48h	2	Hov223	Benzamide	Others
		Hov831	3,4-Dimethoxycinnamic acid	Hydroxycinnamoyl derivatives					Hov760	Phenethylamine	Others
		Hov976	Glutathione reduced form	Amino acid derivatives			24h 4h 8h	2	Hov291	iP7G	Nucleotide and its derivates
		Hov873	Chrysoeriol O-hexosyl-O-hexosyl-O-Glucuronic acid	Flavone					Hov117	Luteolin O-feruloylhexoside	Flavone C-glycosides
		Hov1140	Citraconic acid	Organic acids			48h 4h 8h	6	Hov570	Dihydromyricetin	Flavonol
		Hov1077	D-Glucose 6-phosphate	Carbohydrates					Hov722	N-Feruloyl serotonin	Tryptamine derivatives
		Hov1167	D-Fructose 6-phosphate	Carbohydrates					Hov106	Hesperetin 7-O-neohesperidoside (Neohesperidin)	Flavanone
		Hov578	GIBBERELLIN A9	Phytohormones					Hov892	5-O-p-coumaroyl quinic acid O-hexoside	Quinate and its derivatives
		Hov1070	Uridine 5¡¯-diphosphate	Nucleotide and its derivates					Hov207	Tricin 4'-O-(¦Â-guaiacylglyceryl) ether 5-O-hexosyl-O-hexoside	Flavonolignan
1h 48h	1	Hov493	Thymine	Nucleotide and its derivates					Hov894	3-O-p-coumaroyl quinic acid O-hexoside	Quinate and its derivatives
4h 8h	3	Hov841	9-HOTrE	Lipids_Fatty acids			24h 48h 4h	3	Hov1109	Homoeriodictyol	Flavanone
		Hov847	13-HPODE	Lipids_Fatty acids					Hov509	N-Acetyl-l-leucine	Amino acid derivatives
		Hov846	12,13-EODE	Lipids_Fatty acids					Hov855	Kynurenic acid O-hexside	Organic acids
24h 4h	2	Hov1221	Vitamin D3	Vitamins			1h 4h	4	Hov881	Chrysoeriol O-homovanillic acid	Flavone
		Hov1012	Arctiin	Others					Hov558	(5-L-Glutamyl)-L-amino acid	Amino acid derivatives
24h 8h	11	Hov1015	Pinoresinol	Hydroxycinnamoyl derivatives					Hov123	Apigenin 6-C-pentoside	Flavone C-glycosides
		Hov421	D-Pantothenic dcid	Organic acids					Hov499	5-Aminovaleric acid	Amino acid derivatives
		Hov598	PC 19:2/16:0	Lipids_Glycerophospholipids			1h 8h	1	Hov1084	Calycosin	Isoflavone
		Hov666	Methyl indole-3-acetate	Phytohormones			1h 24h	2	Hov1081	trans,trans-Muconic acid	Organic acids
		Hov1159	Tricin 4'-O-(syringyl alcohol) ether 5-O-hexoside	Flavonolignan					Hov1189	N-acetylglycine	Amino acid derivatives
		Hov1223	Guanosine monophosphate	Nucleotide and its derivates			1h 48h	2	Hov650	N-Acetylcysteine	Amino acid derivatives
		Hov184	LysoPC 18:0	Lipids_Glycerophospholipids					Hov749	D-erythro-Dihydrosphingosine	Others
		Hov768	LysoPE 18:2 (2n isomer)	Lipids_Glycerophospholipids			4h 8h	9	Hov580	Cyclic AMP	Nucleotide and its derivates
		Hov25	LysoPE 18:0 (2n isomer)	Lipids_Glycerophospholipids					Hov1078	D-Sedoheptuiose 7-phosphate	Carbohydrates
		Hov757	LysoPC 10:0	Lipids_Glycerophospholipids					Hov61	3',4',5'-Dihydrotricetin O-hexosyl-O-hexoside	Flavone
		Hov1222	Guanosine 5'-monophosphate	Nucleotide and its derivates					Hov79	Tricin 7-O-hexoside	Flavone
24h 48h	6	Hov693	N-p-Coumaroyl agmatine	Phenolamides					Hov970	D-(+)-Sucrose	Carbohydrates
		Hov704	N'-p-Coumaroyl agmatine	Phenolamides					Hov898	Glucarate O-Phosphoric acid	Carbohydrates
		Hov756	Tricin O-sinapoylhexoside	Flavone					Hov119	N-Methylnicotinamide	Nicotinic acid derivatives
		Hov996	Formononetin (4'-O-methyldaidzein)	Isoflavone					Hov179	Phellodensin F	Others
		Hov71	C-hexosyl-luteolin O-hexoside	Flavone C-glycosides					Hov836	Anthranilate O-hexosyl-O-hexoside	Benzoic acid derivatives
		Hov133	N-(4'-O-glycosyl)-feruloyl agmatine	Phenolamides			24h 4h	3	Hov586	8-Hydroxy-2-deoxyguanosine	Nucleotide and its derivates
1h	23	Hov292	Indole	Indole derivatives					Hov376	2-(dimethylamino)guanosine	Nucleotide and its derivates
		Hov316	Pantothenol	Alcohols and polyols					Hov330	Indole 3-acetic acid (IAA)	Phytohormones
		Hov897	3-O-p-Coumaroyl shikimic acid	Quinate and its derivatives			48h 4h	13	Hov26	LysoPC 19:0	Lipids_Glycerophospholipids
		Hov1051	3-Hydroxypropanoic acid	Organic acids					Hov752	MAG (18:1) isomer1	Lipids_Glycerolipids
		Hov42	Isoquinoline	Alkaloids					Hov74	Luteolin C-hexosyl-O-rhamnoside O-hexoside	Flavone C-glycosides
		Hov1240	L-Pipecolic acid	Amino acid derivatives					Hov897	3-O-p-Coumaroyl shikimic acid	Quinate and its derivatives
		Hov845	4-Methoxycinnamic acid	Hydroxycinnamoyl derivatives					Hov624	Tricin di-O-hexoside	Flavone
		Hov893	Eudesmoyl quinic acid	Quinate and its derivatives					Hov175	Tricin O-malonylhexoside	Flavone
		Hov895	3-O-p-coumaroyl shikimic acid O-hexoside	Quinate and its derivatives					Hov1270	Gibberellin A53	Phytohormones
		Hov1050	3,4-Dihydroxybenzeneacetic acid	Organic acids					Hov592	Butein	Flavanone
		Hov732	L-Proline	Amino acids					Hov1007	Eriodictyol	Flavanone
		Hov1107	Sinapinaldehyde	Hydroxycinnamoyl derivatives					Hov578	GIBBERELLIN A9	Phytohormones
		Hov898	Glucarate O-Phosphoric acid	Carbohydrates					Hov745	MAG (18:1) isomer2	Lipids_Glycerolipids
		Hov780	Citric acid	Organic acids					Hov682	L-Palmitoylcarnitine	Others
		Hov661	Phenylacetyl-L-glutamine	Amino acid derivatives					Hov405	Purine	Nucleotide and its derivates
		Hov445	Cinnamoyl tyramine	Tryptamine derivatives			24h 8h	3	Hov1040	L-Gulonic-¦Ã-lactone	Carbohydrates
		Hov848	Citramalate	Organic acids					Hov220	Vanillin	Benzoic acid derivatives
		Hov1280	Pyrrole-2-carboxylic acid	Amino acid derivatives					Hov482	Aspartic acid di-O-glucoside	Amino acid derivatives
		Hov1030	2-Hydroxybutanoic acid	Organic acids			48h 8h	4	Hov366	N6-Succinyl Adenosine	Nucleotide and its derivates
		Hov902	Diethyl phosphate	Organic acids					Hov790	Chlorogenic acid (3-O-Caffeoylquinic acid)	Quinate and its derivatives
		Hov1207	(+)-Dihydrojasmonic acid	Phytohormones					Hov912	Adenosine	Nucleotide and its derivates
		Hov1299	O-Phosphorylethanolamine	Others					Hov169	Aminopurine	Others
		Hov139	N-Cinnamoyl serotonin	Tryptamine derivatives			24h 48h	3	Hov306	Cinnamic acid	Hydroxycinnamoyl derivatives
4h	3	Hov1040	L-Gulonic-¦Ã-lactone	Carbohydrates					Hov1034	(S)-(-)-2-Hydroxyisocaproic acid	Organic acids
		Hov165	Caffeic aldehyde	Hydroxycinnamoyl derivatives					Hov1110	Isosakuranetin (4'-Methylnaringenin)	Flavanone
		Hov1169	Cucurbitacin E	Terpenoids			1h	4	Hov243	N-sinapoyl cadaverine	Phenolamides
8h	60	Hov100	cis-Zeatin (cZ)	Phytohormones					Hov96	Menaquinone (K2)	Vitamins
		Hov412	Tricin O-vanilloylhexoside	Flavone					Hov257	Sinapoylcholine	Cholines
		Hov782	LysoPE 16:0	Lipids_Glycerophospholipids					Hov999	Baicalein (5,6,7-Trihydroxyflavone)	Flavone
		Hov185	LysoPC 20:1 (2n isomer)	Lipids_Glycerophospholipids			4h	61	Hov292	Indole	Indole derivatives
		Hov531	Deoxycytidine	Nucleotide and its derivates					Hov412	Tricin O-vanilloylhexoside	Flavone
		Hov724	LysoPC 16:0	Lipids_Glycerophospholipids					Hov142	C-hexosyl-chrysoeriol O-rutinoside	Flavone C-glycosides
		Hov335	2-Aminoethanesulfonic acid	Organic acids					Hov310	Apigenin 7-rutinoside (Isorhoifolin)	Flavone
		Hov479	N2-methylguanosine	Nucleotide and its derivates					Hov903	2-Isopropylmalate	Organic acids
		Hov1302	Pyridoxine 5'-phosphate	Vitamins					Hov261	Adenosine 3'-monophosphate	Nucleotide and its derivates
		Hov716	L-Glutamine	Amino acids					Hov444	8-C-hexosyl-chrysoeriol O-feruloylhexoside	Flavone C-glycosides
		Hov303	¦Ã-Glu-Cys	Amino acid derivatives					Hov265	Apigenin O-hexosyl-O-pentoside	Flavone
		Hov50	N-Glycyl-L-leucine	Amino acid derivatives					Hov801	3-O-p-Coumaroyl quinic acid	Quinate and its derivatives
		Hov88	LysoPC 15:0	Lipids_Glycerophospholipids					Hov161	Kaempferide	Flavonol
		Hov214	Cytidine	Nucleotide and its derivates					Hov440	C-hexosyl-chrysoeriol O-sinapoylhexoside	Flavone C-glycosides
		Hov839	9,10-EODE	Lipids_Fatty acids					Hov126	8-C-hexosyl-apigenin O-feruloylhexoside	Flavone C-glycosides
		Hov1185	L-Glutamine O-hexside	Amino acid derivatives					Hov42	Isoquinoline	Alkaloids
		Hov784	LysoPE 16:0 (2n isomer)	Lipids_Glycerophospholipids					Hov419	Tricin 4'-O-(¦Â-guaiacylglyceryl) ether 5-O-hexoside	Flavonolignan
		Hov561	N-Acetylputrescine	Phenolamides					Hov468	Kaempferol	Flavonol
		Hov337	N6-Isopentenyladenine (iP)	Phytohormones					Hov51	Tricin	Flavone
		Hov914	LysoPE 14:0 (2n isomer)	Lipids_Glycerophospholipids					Hov277	6-C-hexosyl-apigenin O-feruloylhexoside	Flavone C-glycosides
		Hov720	Deoxyadenosine	Nucleotide and its derivates					Hov70	Chrysoeriol O-hexosyl-O-hexoside	Flavone
		Hov630	S-(methyl)glutathione	Amino acid derivatives					Hov349	S-(5'-Adenosyl)-L-methionine	Amino acid derivatives
		Hov93	5-Methylcytosine	Nucleotide and its derivates					Hov164	Luteolin 6-C-glucoside	Flavone C-glycosides
		Hov772	L-(+)-Lysine	Amino acids					Hov94	Naringenin 7-O-glucoside (Prunin)	Flavanone
		Hov965	Nicotinic acid	Nicotinic acid derivatives					Hov740	Apigenin 7-O-glucoside (Cosmosiin)	Flavone
		Hov1139	13-HpOTrE(r)	Lipids_Fatty acids					Hov746	Chrysoeriol 7-O-rutinoside	Flavone
		Hov3	Punicic acid	Lipids_Fatty acids					Hov522	Apigenin	Flavone
		Hov152	LysoPC 16:0 (2n isomer)	Lipids_Glycerophospholipids					Hov631	Naringenin 7-O-neohesperidoside (Naringin)	Flavanone
		Hov602	p-Coumaric acid	Hydroxycinnamoyl derivatives					Hov21	Chrysoeriol O-hexosyl-O-rutinoside	Flavone
		Hov1133	Ferulic acid	Hydroxycinnamoyl derivatives					Hov121	C-pentosyl-chrysoeriol 7-O-feruloylhexoside	Flavone C-glycosides
		Hov289	LysoPC 14:0	Lipids_Glycerophospholipids					Hov427	Tricin O-glycerol	Flavone
		Hov962	3-(4-Hydroxyphenyl)propionic acid	Hydroxycinnamoyl derivatives					Hov34	Tricin 5-O-rutinoside	Flavone
		Hov723	LysoPC 18:3	Lipids_Glycerophospholipids					Hov146	C-hexosyl-apigenin O-cinnamoylhexoside	Flavone C-glycosides
		Hov181	Octadecadien-6-ynoic acid	Lipids_Fatty acids					Hov235	Genistein 7-O-Glucoside (Genistin)	Isoflavone
		Hov664	N',N"-p-coumaroyl-feruloyl putrescine	Phenolamides					Hov219	Kaempferol 3-O-rutinoside (Nicotiflorin)	Flavonol
		Hov751	LysoPE 14:0	Lipids_Glycerophospholipids					Hov177	Adenosine 5'-monophosphate	Nucleotide and its derivates
		Hov83	LysoPC 18:1	Lipids_Glycerophospholipids					Hov2	Tricin 4'-O-(¦Â-guaiacylglyceryl) ether O-hexoside	Flavonolignan
		Hov101	Histamine	Amino acid derivatives					Hov399	6-C-hexosyl-apigenin O-sinapoylhexoside	Flavone C-glycosides
		Hov1297	2'-Deoxyinosine	Nucleotide and its derivates					Hov756	Tricin O-sinapoylhexoside	Flavone
		Hov669	Phe-Phe	Amino acid derivatives					Hov63	Tricin O-glycerylhexoside	Flavone
		Hov585	1,4-dihydro-1-Methyl-4-oxo-3-pyridinecarboxamide	Pyridine derivatives					Hov472	Luteolin 7-O-glucoside (Cynaroside)	Flavone
		Hov296	Phytocassane C	Terpenoids					Hov383	Orotic acid	Vitamins
		Hov298	LysoPC 17:0	Lipids_Glycerophospholipids					Hov275	Chrysoeriol C-hexosyl-O-rhamnoside	Flavone C-glycosides
		Hov186	LysoPC 20:1	Lipids_Glycerophospholipids					Hov76	8-C-hexosyl chrysoeriol O-hexoside	Flavone C-glycosides
		Hov701	Deoxyguanosine	Nucleotide and its derivates					Hov221	Kaempferol 3-O-galactoside (Trifolin)	Flavonol
		Hov315	L-Theanine	Amino acids					Hov75	C-hexosyl-apigenin C-pentoside	Flavone C-glycosides
		Hov1072	2-(Formylamino)benzoic acid	Organic acids					Hov269	Chrysoeriol 6-C-hexoside 8-C-hexoside-O-hexoside	Flavone C-glycosides
		Hov54	Quercetin 3-O-rutinoside (Rutin)	Flavonol					Hov594	Anthranilic acid	Benzoic acid derivatives
		Hov695	L-Methionine	Amino acids					Hov209	N-Feruloyl spermidine	Phenolamides
		Hov749	D-erythro-Dihydrosphingosine	Others					Hov543	Nicotinic Acid Methyl Ester (Methyl Nicotinate)	Vitamins
		Hov90	Cytosine	Nucleotide and its derivates					Hov521	Chrysoeriol	Flavone
		Hov636	5-Methyluridine	Nucleotide and its derivates					Hov57	Chrysoeriol O-hexosyl-O-pentoside	Flavone
		Hov66	LysoPC 16:1	Lipids_Glycerophospholipids					Hov172	Peonidin	Anthocyanins
		Hov397	Thymidine	Nucleotide and its derivates					Hov721	Tricin 4'-O-syringyl alcohol	Flavonolignan
		Hov607	2-Hydroxy-6-aminopurine	Nucleotide and its derivates					Hov259	2-Aminoethylphosphonate	Others
		Hov502	Asp-phe	Amino acid derivatives					Hov272	Luteolin C-hexoside	Flavone C-glycosides
		Hov488	LysoPE 18:0	Lipids_Glycerophospholipids					Hov58	Chrysoeriol 7-O-hexoside	Flavone
		Hov842	9-KODE	Lipids_Fatty acids					Hov828	Syringaldehyde O-glucoside	Others
		Hov963	3-Hydroxy-4-methoxycinnamic acid	Hydroxycinnamoyl derivatives					Hov25	LysoPE 18:0 (2n isomer)	Lipids_Glycerophospholipids
		Hov182	4-Hydroxysphinganine	Lipids_Fatty acids					Hov488	LysoPE 18:0	Lipids_Glycerophospholipids
24h	46	Hov829	Acetyl tryptophan	Amino acid derivatives					Hov757	LysoPC 10:0	Lipids_Glycerophospholipids
		Hov39	Apigenin 6-C-hexosyl-8-C-hexosyl-O-hexoside	Flavone C-glycosides					Hov677	Tricin O-phenylformic acid	Flavone
		Hov566	N-Acetyl-5-hydroxytryptamine	Tryptamine derivatives					Hov174	Chrysoeriol 8-C-hexoside	Flavone C-glycosides
		Hov1173	Methyl gallate	Benzoic acid derivatives					Hov201	Tricin O-hexosyl-O-syringin alcohol	Flavone
		Hov166	MAG (18:4) isomer1	Lipids_Glycerolipids			8h	27	Hov347	5-Hydroxyindole-3-acetic acid	Indole derivatives
		Hov53	Tricin 4'-O-¦Â-guaiacylglycerol	Flavonolignan					Hov84	trans-zeatin 9-O-glucoside	Phytohormones
		Hov853	L-Glutamic acid O-glucoside	Amino acid derivatives					Hov283	O-Feruloyl quinic acid	Quinate and its derivatives
		Hov881	Chrysoeriol O-homovanillic acid	Flavone					Hov857	Uridine 5'-diphospho-D-glucose	Nucleotide and its derivates
		Hov790	Chlorogenic acid (3-O-Caffeoylquinic acid)	Quinate and its derivatives					Hov1336	3-Chloro-L-tyrosine	Amino acid derivatives
		Hov444	8-C-hexosyl-chrysoeriol O-feruloylhexoside	Flavone C-glycosides					Hov781	1-O-beta-D-Glucopyranosyl sinapate	Hydroxycinnamoyl derivatives
		Hov1041	D-Arabitol	Alcohols and polyols					Hov480	Hydroxy-methoxycinnamate	Hydroxycinnamoyl derivatives
		Hov908	Glutathione oxidized	Amino acid derivatives					Hov380	3-Hydroxykynurenine	Amino acid derivatives
		Hov1213	N-Acetylmethionine	Amino acid derivatives					Hov694	Niacinamide	Vitamins
		Hov692	N-Feruloyl agmatine	Phenolamides					Hov171	Nicotinic acid adenine dinucleotide	Nucleotide and its derivates
		Hov468	Kaempferol	Flavonol					Hov885	Tricin O-saccharic acid	Flavone
		Hov51	Tricin	Flavone					Hov893	Eudesmoyl quinic acid	Quinate and its derivatives
		Hov1108	p-Coumaraldehyde	Hydroxycinnamoyl derivatives					Hov826	2-Deoxyribose 1-phosphate	Carbohydrates
		Hov859	Caftaric acid	Hydroxycinnamoyl derivatives					Hov1172	Mandelic acid	Organic acids
		Hov236	N-sinapoyl hydroxycoumarin	Coumarins					Hov1221	Vitamin D3	Vitamins
		Hov349	S-(5'-Adenosyl)-L-methionine	Amino acid derivatives					Hov1233	N-Acetylglucosamine 1-phosphate	Others
		Hov171	Nicotinic acid adenine dinucleotide	Nucleotide and its derivates					Hov1142	Tricin 5-O-hexoside	Flavone
		Hov478	PC 16:1/14:1	Lipids_Glycerophospholipids					Hov849	3-O-Feruloyl quinic acid glucoside	Quinate and its derivatives
		Hov1094	p-Coumaryl alcohol	Hydroxycinnamoyl derivatives					Hov838	4-hydroxycoumarin di-glucoside	Coumarins
		Hov918	L-Glutamic acid	Amino acids					Hov1212	(-)-Sinigrin hydrate	Others
		Hov225	C-hexosyl-apigenin O-feruloylhexoside-O-hexoside	Flavone C-glycosides					Hov1160	2¨Cfuranoic acid	Organic acids
		Hov896	O-p-Coumaroyl quinic acid O-rutinoside derivative	Quinate and its derivatives					Hov599	6-Methoxy-7,8-DihydroxyCoumarin	Coumarins
		Hov438	Tricin 4'-O-syringic acid	Flavonolignan					Hov638	¦Â-Nicotinamide mononucleotide	Nucleotide and its derivates
		Hov698	MAG (18:3) isomer3	Lipids_Glycerolipids					Hov825	E-3,4,5'-Trihydroxy-3'-glucopyranosylstilbene	Others
		Hov971	Gluconic acid	Carbohydrates					Hov827	5-O-Feruloyl quinic acid glucoside	Quinate and its derivatives
		Hov1114	Myricetin 3-O-galactoside	Flavonol					Hov195	O-Sinapoyl quinic acid	Quinate and its derivatives
		Hov115	Luteolin O-hexoside O-feruloylpentoside	Flavone					Hov300	Succinyladenosine	Nucleotide and its derivates
		Hov45	6-C-hexosyl-chrysoeriol O-feruloylhexoside	Flavone C-glycosides			24h	12	Hov562	Indole-3-carboxaldehyde	Indole derivatives
		Hov391	Spermidine	Phenolamides					Hov180	MAG (18:4) isomer3	Lipids_Glycerolipids
		Hov270	6-C-hexosyl-luteolin O-hexoside	Flavone C-glycosides					Hov640	Azelaic acid	Organic acids
		Hov945	2-Methylsuccinic acid	Organic acids					Hov1020	D-Erythronolactone	Organic acids
		Hov521	Chrysoeriol	Flavone					Hov1297	2'-Deoxyinosine	Nucleotide and its derivates
		Hov1032	N-[(-)-Jasmonoyl]-(L)-Isoleucine (JA-L-Ile)	Phytohormones					Hov732	L-Proline	Amino acids
		Hov1340	Tricin O-malonyl rhamnoside	Flavone					Hov713	Adenosine O-ribose	Nucleotide and its derivates
		Hov205	(+)-Jasmonic acid (JA)	Phytohormones					Hov97	6-hydroxynicotinic acid	Vitamins
		Hov721	Tricin 4'-O-syringyl alcohol	Flavonolignan					Hov701	Deoxyguanosine	Nucleotide and its derivates
		Hov836	Anthranilate O-hexosyl-O-hexoside	Benzoic acid derivatives					Hov1202	L-Cysteine	Amino acids
		Hov178	O-Feruloyl 3-hydroxylcoumarin	Coumarins					Hov1018	3-Hydroxy-3-methyl butyric acid	Organic acids
		Hov151	MGMG (18:2) isomer1	Lipids_Glycerolipids					Hov397	Thymidine	Nucleotide and its derivates
		Hov677	Tricin O-phenylformic acid	Flavone			48h	28	Hov185	LysoPC 20:1 (2n isomer)	Lipids_Glycerophospholipids
		Hov195	O-Sinapoyl quinic acid	Quinate and its derivatives					Hov1148	5-O-p-coumaroyl shikimic acid O-hexoside	Quinate and its derivatives
		Hov1277	Tricin O-eudesmic acid	Flavone					Hov6	MGMG (18:2) isomer2	Lipids_Glycerolipids
48h	5	Hov213	Trigonelline	Alkaloids					Hov853	L-Glutamic acid O-glucoside	Amino acid derivatives
		Hov580	Cyclic AMP	Nucleotide and its derivates					Hov1100	Syringetin	Flavonol
		Hov359	2'-Deoxyadenosine-5'-monophosphate	Nucleotide and its derivates					Hov537	8-Hydroxyguanosine	Nucleotide and its derivates
		Hov360	1-methylguanidine	Nucleotide and its derivates					Hov152	LysoPC 16:0 (2n isomer)	Lipids_Glycerophospholipids
		Hov985	Homogentisic acid	Organic acids					Hov730	LysoPC 20:4	Lipids_Glycerophospholipids
									Hov425	N-formylmethionine	Amino acid derivatives
									Hov870	Apigenin O-hexosyl-O-rutinoside	Flavone
									Hov89	LysoPC 18:0 (2n isomer)	Lipids_Glycerophospholipids
									Hov296	Phytocassane C	Terpenoids
									Hov947	Benzoylformic acid	Organic acids
									Hov907	LysoPE 18:1 (2n isomer)	Lipids_Glycerophospholipids
									Hov186	LysoPC 20:1	Lipids_Glycerophospholipids
									Hov1077	D-Glucose 6-phosphate	Carbohydrates
									Hov1091	Prunetin	Isoflavone
									Hov816	Kaempferol 3-O-glucoside (Astragalin)	Flavonol
									Hov445	Cinnamoyl tyramine	Tryptamine derivatives
									Hov1001	Isorhamnetin 3-O-neohesperidoside	Flavonol
									Hov717	serotonin	Tryptamine derivatives
									Hov1098	Rhamnetin (7-O-methxyl quercetin)	Flavonol
									Hov441	N-Feruloyl tyramine	Phenolamides
									Hov725	LysoPC 18:1 (2n isomer)	Lipids_Glycerophospholipids
									Hov54	Quercetin 3-O-rutinoside (Rutin)	Flavonol
									Hov82	LysoPE 18:1	Lipids_Glycerophospholipids
									Hov154	Quercetin 7-O-rutinoside	Flavonol
									Hov182	4-Hydroxysphinganine	Lipids_Fatty acids
